# Supplementary material for: Single-cell RNA-seq reveals trans-sialidase-like superfamily gene expression heterogeneity in Trypanosoma cruzi populations
Source: eLife. 2026 Apr 7;14:RP105822. doi: 10.7554/eLife.105822 (PMC13056360; doi:10.7554/eLife.105822)
Supplement: Supplementary file 4. — (a) All trypomastigote cells, (b) Trypomastigote cells corresponding to the trypo_ 0 cluster and (c) Trypomastigote cells corresponding to the trypo_ 1 cluster. [file elife-105822-supp4.xlsx]

## Sheet: a) All trypomastigotes
Supplementary File 4. Percentage of cells in which each TcTS is expressed in trypomastigote cell population
a) All trypomastigote cells
Gene	Percent_Expressed	Genomic Location	Product Description
C4B63_84g32	82.0536	PRFA01000084:112,926..115,919(+)	trans-sialidase, Group VIII
C4B63_260g23	70.6043	PRFA01000260:12,692..15,079(-)	trans-sialidase, Group II
C4B63_156g20	69.1504	PRFA01000156:62,715..65,828(+)	trans-sialidase, Group VIII
C4B63_22g135	68.06	PRFA01000022:368,932..371,229(+)	trans-sialidase, Group V
C4B63_86g95	66.5152	PRFA01000086:19,909..22,740(-)	trans-sialidase, Group III
C4B63_40g138	57.701	PRFA01000040:281,437..283,686(+)	trans-sialidase, Group II
C4B63_14g229	56.9741	PRFA01000014:514,917..517,280(+)	trans-sialidase, Group II
C4B63_419g2	53.7029	PRFA01000419:7,079..9,895(+)	trans-sialidase
C4B63_135g26	53.7029	PRFA01000135:56,137..58,578(-)	trans-sialidase, Group V
C4B63_361g15	50.0682	PRFA01000361:7,220..9,532(-)	trans-sialidase, Group V
C4B63_65g71	49.1595	PRFA01000065:109,450..111,816(+)	trans-sialidase, Group II
C4B63_145g11	49.0686	PRFA01000145:18,864..21,878(+)	trans-sialidase, Group III
C4B63_51g210	47.8873	PRFA01000051:83,519..85,831(-)	trans-sialidase, Group V
C4B63_568g1	46.1154	PRFA01000568:701..3,013(+)	trans-sialidase, Group II
C4B63_49g210	45.3885	PRFA01000049:41,857..44,958(-)	trans-sialidase, Group VIII
C4B63_47g122	43.8891	PRFA01000047:276,278..279,022(+)	trans-sialidase
C4B63_1g480	43.7074	PRFA01000001:1,136,009..1,138,369(+)	trans-sialidase, Group V
C4B63_47g92	42.617	PRFA01000047:221,928..224,669(+)	trans-sialidase
C4B63_145g23	42.2535	PRFA01000145:44,960..47,980(+)	trans-sialidase, Group III
C4B63_156g18	40.7996	PRFA01000156:46,341..49,283(+)	trans-sialidase
C4B63_1g82	40.7088	PRFA01000001:172,679..175,297(+)	trans-sialidase, Group II
C4B63_35g193	40.5725	PRFA01000035:399,901..403,020(+)	trans-sialidase, Group VIII
C4B63_8g108	39.3458	PRFA01000008:385,177..387,945(+)	trans-sialidase, Group VI
C4B63_35g347	39.1186	PRFA01000035:98,010..101,138(-)	trans-sialidase, Group VIII
C4B63_8g282	37.8919	PRFA01000008:699,125..701,524(-)	trans-sialidase, Group V
C4B63_8g77	37.7101	PRFA01000008:322,968..325,751(+)	trans-sialidase, Group VI
C4B63_72g38	37.4375	PRFA01000072:171,093..173,552(+)	trans-sialidase, Group II
C4B63_1g788	36.3017	PRFA01000001:1,471,299..1,474,469(-)	trans-sialidase, Group VIII
C4B63_41g261	35.8019	PRFA01000041:100,724..103,444(-)	trans-sialidase, Group IV
C4B63_387g16	35.2567	PRFA01000387:11,197..13,446(-)	trans-sialidase, Group II
C4B63_73g11	35.2113	PRFA01000073:19,000..21,672(+)	trans-sialidase, Group IV
C4B63_124g40	31.9855	PRFA01000124:73,808..76,945(+)	trans-sialidase, Group VIII
C4B63_77g67	31.3948	PRFA01000077:131,426..134,452(+)	trans-sialidase, Group III
C4B63_68g103	31.0768	PRFA01000068:89,317..91,599(-)	trans-sialidase, Group II
C4B63_77g40	30.577	PRFA01000077:83,041..86,067(+)	trans-sialidase, Group III
C4B63_31g119	30.259	PRFA01000031:348,644..350,296(+)	trans-sialidase, Group II
C4B63_1g1102	30.1227	PRFA01000001:746,689..749,064(-)	trans-sialidase, Group V
C4B63_455g9	30.0318	PRFA01000455:8,884..11,385(+)	trans-sialidase, Group VII
C4B63_5g740	29.8955	PRFA01000005:141,333..143,702(-)	trans-sialidase, Group V
C4B63_155g17	29.3503	PRFA01000155:55,219..57,597(+)	trans-sialidase, Group II
C4B63_156g6	29.3503	PRFA01000156:11,865..14,609(+)	trans-sialidase
C4B63_1g368	29.2594	PRFA01000001:870,745..873,915(+)	trans-sialidase, Group VIII
C4B63_131g42	28.8051	PRFA01000131:68,466..70,952(-)	trans-sialidase, Group II
C4B63_164g14	28.6234	PRFA01000164:36,856..39,270(+)	trans-sialidase, Group II
C4B63_145g21	27.3966	PRFA01000145:36,872..39,640(+)	trans-sialidase, Group IV
C4B63_67g26	27.3966	PRFA01000067:42,473..44,839(+)	trans-sialidase, Group II
C4B63_34g137	27.124	PRFA01000034:376,631..379,315(+)	trans-sialidase, Group IV
C4B63_105g53	26.9877	PRFA01000105:59,307..62,435(-)	trans-sialidase, Group VIII
C4B63_75g105	26.7151	PRFA01000075:20,689..23,199(-)	trans-sialidase, Group II
C4B63_35g363	26.5788	PRFA01000035:64,808..68,272(-)	trans-sialidase, Group VIII
C4B63_5g393	25.3975	PRFA01000005:861,389..863,737(+)	trans-sialidase, Group V
C4B63_64g80	24.8069	PRFA01000064:142,317..144,785(+)	trans-sialidase, Group V
C4B63_119g19	24.7615	PRFA01000119:44,859..47,987(+)	trans-sialidase, Group VIII
C4B63_77g50	24.7615	PRFA01000077:101,051..103,819(+)	trans-sialidase, Group IV
C4B63_42g262	24.6706	PRFA01000042:17,498..20,617(-)	trans-sialidase, Group VIII
C4B63_27g266	24.3526	PRFA01000027:178,047..180,377(-)	trans-sialidase, Group V
C4B63_157g46	23.7619	PRFA01000157:4,994..7,174(-)	trans-sialidase, Group II
C4B63_1g201	23.5802	PRFA01000001:439,502..441,838(+)	trans-sialidase, Group V
C4B63_154g5	23.3076	PRFA01000154:9,166..11,688(+)	trans-sialidase, Group II
C4B63_50g98	23.3076	PRFA01000050:274,407..276,740(+)	trans-sialidase, Group V
C4B63_5g433	23.035	PRFA01000005:879,574..881,370(-)	trans-sialidase, Group V
C4B63_5g493	22.9441	PRFA01000005:732,084..734,423(-)	trans-sialidase, Group V
C4B63_131g47	22.0354	PRFA01000131:45,359..47,881(-)	trans-sialidase, Group II
C4B63_1g473	21.8083	PRFA01000001:1,118,975..1,121,704(+)	trans-sialidase
C4B63_37g415	21.8083	PRFA01000037:14,305..17,439(-)	trans-sialidase, Group VIII
C4B63_162g7	21.2176	PRFA01000162:30,539..33,244(+)	trans-sialidase, Group II
C4B63_69g34	21.0359	PRFA01000069:71,267..73,945(+)	trans-sialidase, Group I
C4B63_14g138	20.4907	PRFA01000014:308,216..310,573(+)	trans-sialidase, Group I
C4B63_260g20	20.1726	PRFA01000260:21,258..23,423(-)	trans-sialidase, Group II
C4B63_5g376	19.7183	PRFA01000005:818,787..821,297(+)	trans-sialidase, Group V
C4B63_71g189	19.6274	PRFA01000071:51,916..54,288(-)	trans-sialidase, Group II
C4B63_23g158	19.4457	PRFA01000023:465,478..468,426(-)	trans-sialidase
C4B63_311g19	19.1731	PRFA01000311:19,592..22,063(-)	trans-sialidase, Group V
C4B63_305g8	18.0827	PRFA01000305:21,580..23,763(+)	trans-sialidase, Group II
C4B63_105g66	17.7647	PRFA01000105:19,602..22,724(-)	trans-sialidase, Group VIII
C4B63_360g18	17.3103	PRFA01000360:4,370..6,733(-)	trans-sialidase, Group II
C4B63_64g142	16.8105	PRFA01000064:163,872..165,713(-)	trans-sialidase, Group V
C4B63_111g19	16.7651	PRFA01000111:39,478..42,114(+)	trans-sialidase, Group V
C4B63_105g45	16.6742	PRFA01000105:96,607..99,732(-)	trans-sialidase, Group VIII
C4B63_105g61	16.1745	PRFA01000105:38,825..41,008(-)	trans-sialidase, Group II
C4B63_59g52	16.0836	PRFA01000059:53,109..55,514(+)	trans-sialidase, Group V
C4B63_10g538	15.7201	PRFA01000010:13,600..15,972(-)	trans-sialidase, Group II
C4B63_35g136	15.5384	PRFA01000035:284,751..287,267(+)	trans-sialidase, Group V
C4B63_109g61	15.493	PRFA01000109:56,679..58,856(-)	trans-sialidase, Group II
C4B63_119g31	14.8114	PRFA01000119:63,765..66,887(+)	trans-sialidase, Group VIII
C4B63_34g140	14.1754	PRFA01000034:387,220..389,931(+)	trans-sialidase, Group IV
C4B63_5g356	14.0845	PRFA01000005:776,490..778,823(+)	trans-sialidase, Group V
C4B63_95g6	13.9028	PRFA01000095:10,668..13,016(+)	trans-sialidase, Group V
C4B63_39g233	13.4939	PRFA01000039:291,339..294,047(-)	trans-sialidase, Group V
C4B63_174g27	13.3121	PRFA01000174:39,635..42,118(-)	trans-sialidase, Group V
C4B63_32g172	12.9487	PRFA01000032:428,939..431,188(+)	trans-sialidase, Group II
C4B63_134g49	12.9487	PRFA01000134:42,534..45,068(-)	trans-sialidase, Group V
C4B63_119g5	12.7669	PRFA01000119:12,073..15,201(+)	trans-sialidase, Group VIII
C4B63_134g54	12.6761	PRFA01000134:31,543..34,077(-)	trans-sialidase, Group V
C4B63_35g131	12.358	PRFA01000035:273,505..275,994(+)	trans-sialidase, Group V
C4B63_35g143	11.1313	PRFA01000035:295,763..298,270(+)	trans-sialidase, Group V
C4B63_75g91	11.1313	PRFA01000075:59,858..62,374(-)	trans-sialidase, Group II
C4B63_27g327	10.7224	PRFA01000027:47,628..50,108(-)	trans-sialidase, Group V
C4B63_47g128	10.6315	PRFA01000047:299,654..302,398(+)	trans-sialidase
C4B63_1g748	10.4044	PRFA01000001:1,569,094..1,572,237(-)	trans-sialidase, Group VIII
C4B63_31g233	10.1772	PRFA01000031:106,345..108,942(-)	trans-sialidase, Group V
C4B63_111g12	9.99546	PRFA01000111:23,438..26,056(+)	trans-sialidase, Group V
C4B63_12g268	9.90459	PRFA01000012:345,535..348,372(-)	trans-sialidase, Group VI
C4B63_27g282	9.81372	PRFA01000027:136,078..138,537(-)	trans-sialidase, Group V
C4B63_60g110	9.76829	PRFA01000060:172,043..174,670(-)	trans-sialidase, Group V
C4B63_148g10	9.58655	PRFA01000148:13,536..16,949(+)	trans-sialidase, Group VIII
C4B63_5g131	9.58655	PRFA01000005:303,345..305,744(+)	trans-sialidase, Group V
C4B63_31g250	9.35938	PRFA01000031:62,906..65,686(-)	trans-sialidase, Group V
C4B63_146g45	9.22308	PRFA01000146:22,084..24,801(-)	trans-sialidase, Group VI
C4B63_60g89	9.22308	PRFA01000060:206,350..209,010(-)	trans-sialidase, Group V
C4B63_39g377	9.22308	PRFA01000039:1,682..4,558(-)	trans-sialidase, Group VIII
C4B63_131g50	9.08678	PRFA01000131:28,317..30,872(-)	trans-sialidase, Group I
C4B63_31g230	8.99591	PRFA01000031:117,214..119,808(-)	trans-sialidase, Group V
C4B63_1g794	8.81418	PRFA01000001:1,445,059..1,447,425(-)	trans-sialidase, Group V
C4B63_31g257	8.72331	PRFA01000031:45,089..47,716(-)	trans-sialidase, Group V
C4B63_91g81	8.58701	PRFA01000091:39,926..42,382(-)	trans-sialidase, Group II
C4B63_1g176	8.49614	PRFA01000001:374,385..377,222(+)	trans-sialidase
C4B63_141g33	8.49614	PRFA01000141:69,994..72,696(+)	trans-sialidase, Group I
C4B63_3g1037	8.1781	PRFA01000003:214,189..216,876(-)	trans-sialidase, Group V
C4B63_118g10	7.99637	PRFA01000118:37,211..39,394(+)	trans-sialidase, Group II
C4B63_37g206	7.99637	PRFA01000037:388,570..391,191(+)	trans-sialidase, Group VI
C4B63_68g134	7.86006	PRFA01000068:10,310..12,529(-)	trans-sialidase, Group II
C4B63_109g58	7.7692	PRFA01000109:65,971..68,802(-)	trans-sialidase, Group V
C4B63_31g260	7.49659	PRFA01000031:34,220..36,823(-)	trans-sialidase, Group V
C4B63_35g154	7.49659	PRFA01000035:317,819..320,602(+)	trans-sialidase, Group V
C4B63_37g106	7.22399	PRFA01000037:239,436..242,204(+)	trans-sialidase, Group VI
C4B63_37g189	7.04225	PRFA01000037:369,320..372,184(+)	trans-sialidase, Group VI
C4B63_8g285	6.99682	PRFA01000008:690,013..692,379(-)	trans-sialidase, Group V
C4B63_5g44	6.95139	PRFA01000005:99,687..102,368(+)	trans-sialidase, Group V
C4B63_31g238	6.95139	PRFA01000031:95,678..98,278(-)	trans-sialidase, Group V
C4B63_180g6	6.95139	PRFA01000180:8,959..11,220(+)	trans-sialidase, Group II
C4B63_39g154	6.81508	PRFA01000039:361,021..363,426(+)	trans-sialidase, Group V
C4B63_11g376	6.72422	PRFA01000011:358,411..361,422(-)	trans-sialidase, Group VI
C4B63_37g89	6.72422	PRFA01000037:203,044..205,914(+)	trans-sialidase, Group VI
C4B63_305g1	6.67878	PRFA01000305:3,828..6,011(+)	trans-sialidase, Group II
C4B63_53g223	6.63335	PRFA01000053:67,486..70,131(-)	trans-sialidase
C4B63_1g782	6.40618	PRFA01000001:1,482,436..1,484,955(-)	trans-sialidase, Group V
C4B63_75g84	6.40618	PRFA01000075:74,499..77,009(-)	trans-sialidase, Group VII
C4B63_31g255	6.36075	PRFA01000031:51,974..54,586(-)	trans-sialidase, Group V
C4B63_49g199	6.36075	PRFA01000049:71,490..73,673(-)	trans-sialidase, Group II
C4B63_5g328	6.13358	PRFA01000005:718,572..721,232(+)	trans-sialidase, Group VI
C4B63_41g277	6.08814	PRFA01000041:61,004..63,181(-)	trans-sialidase, Group II
C4B63_6g579	5.95184	PRFA01000006:62,302..64,377(-)	trans-sialidase, Group I
C4B63_1g702	5.95184	PRFA01000001:1,599,069..1,601,807(+)	trans-sialidase, Group V
C4B63_27g306	5.86097	PRFA01000027:85,847..88,330(-)	trans-sialidase, Group V
C4B63_61g27	5.72467	PRFA01000061:105,507..107,753(+)	trans-sialidase, Group I
C4B63_134g39	5.54294	PRFA01000134:64,917..67,412(-)	trans-sialidase, Group V
C4B63_106g19	5.4975	PRFA01000106:36,145..38,850(+)	trans-sialidase, Group V
C4B63_17g208	5.4975	PRFA01000017:474,010..477,420(-)	trans-sialidase, Group VIII
C4B63_77g53	5.3612	PRFA01000077:112,536..115,550(+)	trans-sialidase, Group III
C4B63_46g113	5.31577	PRFA01000046:314,707..317,025(+)	trans-sialidase, Group V
C4B63_136g6	5.27033	PRFA01000136:12,982..15,984(+)	trans-sialidase, Group I
C4B63_35g148	5.2249	PRFA01000035:306,763..309,273(+)	trans-sialidase, Group V
C4B63_108g29	4.95229	PRFA01000108:63,381..65,555(+)	trans-sialidase, Group II
C4B63_67g29	4.58882	PRFA01000067:46,850..49,465(+)	trans-sialidase, Group VI
C4B63_68g111	4.58882	PRFA01000068:53,256..55,460(-)	trans-sialidase, Group II
C4B63_71g178	4.54339	PRFA01000071:63,111..65,753(-)	trans-sialidase, Group VI
C4B63_146g39	4.40709	PRFA01000146:39,496..42,354(-)	trans-sialidase, Group V
C4B63_39g55	4.36165	PRFA01000039:144,094..146,433(+)	trans-sialidase, Group V
C4B63_17g205	4.27079	PRFA01000017:483,248..486,661(-)	trans-sialidase, Group VIII
C4B63_134g59	4.27079	PRFA01000134:20,603..23,098(-)	trans-sialidase, Group V
C4B63_29g223	4.27079	PRFA01000029:436,970..439,138(+)	trans-sialidase, Group II
C4B63_3g1132	4.17992	PRFA01000003:27,211..29,661(-)	trans-sialidase, Group I
C4B63_29g292	4.13448	PRFA01000029:301,383..303,998(-)	trans-sialidase, Group V
C4B63_29g141	4.13448	PRFA01000029:282,353..285,058(+)	trans-sialidase, Group V
C4B63_94g89	4.08905	PRFA01000094:23,028..25,244(-)	trans-sialidase, Group II
C4B63_88g29	4.04362	PRFA01000088:63,137..65,938(+)	trans-sialidase, Group V
C4B63_37g381	3.90731	PRFA01000037:99,345..101,534(-)	trans-sialidase, Group II
C4B63_134g44	3.90731	PRFA01000134:53,726..56,215(-)	trans-sialidase, Group V
C4B63_43g83	3.86188	PRFA01000043:324,804..327,029(+)	trans-sialidase, Group II
C4B63_96g38	3.77101	PRFA01000096:82,277..84,898(+)	trans-sialidase, Group V
C4B63_50g193	3.77101	PRFA01000050:107,484..110,093(-)	trans-sialidase, Group VI
C4B63_21g168	3.72558	PRFA01000021:454,990..457,206(+)	trans-sialidase, Group II
C4B63_66g146	3.72558	PRFA01000066:113,285..115,564(-)	trans-sialidase, Group V
C4B63_1g585	3.68015	PRFA01000001:1,338,439..1,341,192(+)	trans-sialidase, Group V
C4B63_8g240	3.63471	PRFA01000008:672,820..675,600(+)	trans-sialidase, Group VI
C4B63_16g181	3.58928	PRFA01000016:474,095..477,115(+)	trans-sialidase, Group VIII
C4B63_13g14	3.40754	PRFA01000013:36,346..38,766(+)	trans-sialidase, Group V
C4B63_64g133	3.0895	PRFA01000064:174,092..176,785(-)	trans-sialidase, Group V
C4B63_66g57	3.0895	PRFA01000066:140,104..142,950(+)	trans-sialidase, Group VI
C4B63_3g1069	3.0895	PRFA01000003:144,195..146,816(-)	trans-sialidase, Group V
C4B63_124g14	3.04407	PRFA01000124:19,259..21,700(+)	trans-sialidase, Group V
C4B63_77g60	2.90777	PRFA01000077:122,003..125,029(+)	trans-sialidase, Group III
C4B63_60g204	2.86234	PRFA01000060:3,003..6,158(-)	trans-sialidase
C4B63_27g322	2.8169	PRFA01000027:57,467..60,064(-)	trans-sialidase, Group V
C4B63_166g26	2.8169	PRFA01000166:57,228..60,299(+)	trans-sialidase, Group VIII
C4B63_21g182	2.72603	PRFA01000021:489,376..491,592(+)	trans-sialidase, Group II
C4B63_240g10	2.58973	PRFA01000240:25,502..27,745(+)	trans-sialidase, Group II
C4B63_132g20	2.45343	PRFA01000132:55,925..58,396(+)	trans-sialidase, Group V
C4B63_16g197	2.45343	PRFA01000016:526,611..529,733(+)	trans-sialidase, Group VIII
C4B63_26g358	2.408	PRFA01000026:4,310..7,117(-)	trans-sialidase, Group VI
C4B63_158g35	2.36256	PRFA01000158:46,073..48,439(-)	trans-sialidase, Group II
C4B63_67g177	2.31713	PRFA01000067:67,772..70,612(-)	trans-sialidase, Group VI
C4B63_72g4	2.27169	PRFA01000072:7,177..9,411(+)	trans-sialidase, Group II
C4B63_88g97	2.22626	PRFA01000088:42,203..44,686(-)	trans-sialidase, Group V
C4B63_223g5	2.18083	PRFA01000223:7,799..10,426(+)	trans-sialidase, Group VI
C4B63_33g167	2.13539	PRFA01000033:368,510..370,675(+)	trans-sialidase, Group II
C4B63_56g144	2.08996	PRFA01000056:49,562..51,958(-)	trans-sialidase, Group V
C4B63_72g6	2.04453	PRFA01000072:13,146..15,506(+)	trans-sialidase, Group II
C4B63_72g19	1.99909	PRFA01000072:108,008..110,512(+)	trans-sialidase, Group II
C4B63_15g389	1.99909	PRFA01000015:312,409..314,898(-)	trans-sialidase, Group II
C4B63_99g72	1.90822	PRFA01000099:83,462..84,658(-)	trans-sialidase, Group V
C4B63_98g22	1.86279	PRFA01000098:51,172..52,926(+)	trans-sialidase
C4B63_88g102	1.86279	PRFA01000088:31,196..33,796(-)	trans-sialidase, Group V
C4B63_39g111	1.81736	PRFA01000039:268,190..270,583(+)	trans-sialidase, Group V
C4B63_155g10	1.77192	PRFA01000155:22,472..24,649(+)	trans-sialidase
C4B63_99g97	1.77192	PRFA01000099:32,257..34,839(-)	trans-sialidase, Group V
C4B63_299g15	1.77192	PRFA01000299:19,555..22,236(-)	trans-sialidase, Group V
C4B63_60g203	1.77192	PRFA01000060:8,389..10,779(-)	trans-sialidase, Group II
C4B63_29g108	1.72649	PRFA01000029:210,837..213,728(+)	trans-sialidase, Group V
C4B63_296g27	1.72649	PRFA01000296:4,538..6,862(-)	trans-sialidase, Group V
C4B63_39g66	1.68105	PRFA01000039:165,864..168,182(+)	trans-sialidase, Group V
C4B63_71g196	1.63562	PRFA01000071:32,848..35,460(-)	trans-sialidase, Group VI
C4B63_31g263	1.59019	PRFA01000031:23,429..26,176(-)	trans-sialidase, Group V
C4B63_37g98	1.54475	PRFA01000037:217,495..220,128(+)	trans-sialidase, Group VI
C4B63_13g176	1.49932	PRFA01000013:564,130..566,337(+)	trans-sialidase, Group VIII
C4B63_11g198	1.45388	PRFA01000011:472,746..475,766(+)	trans-sialidase, Group VI
C4B63_15g419	1.45388	PRFA01000015:253,587..256,349(-)	trans-sialidase, Group V
C4B63_33g38	1.45388	PRFA01000033:85,763..88,132(+)	trans-sialidase, Group V
C4B63_116g59	1.45388	PRFA01000116:62,097..64,934(-)	trans-sialidase, Group VI
C4B63_27g337	1.40845	PRFA01000027:27,838..30,174(-)	trans-sialidase, Group V
C4B63_43g92	1.40845	PRFA01000043:345,624..348,758(+)	trans-sialidase, Group VIII
C4B63_27g292	1.27215	PRFA01000027:115,024..117,609(-)	trans-sialidase, Group V
C4B63_3g567	1.22672	PRFA01000003:1,195,129..1,197,474(-)	trans-sialidase, Group V
C4B63_58g227	1.22672	PRFA01000058:28,956..32,099(-)	trans-sialidase, Group VIII
C4B63_130g39	1.22672	PRFA01000130:29,592..32,090(-)	trans-sialidase, Group II
C4B63_191g3	1.22672	PRFA01000191:15,588..18,446(+)	trans-sialidase, Group VI
C4B63_3g760	1.18128	PRFA01000003:779,145..781,583(-)	trans-sialidase, Group V
C4B63_5g374	1.18128	PRFA01000005:810,877..813,537(+)	trans-sialidase
C4B63_1g666	1.13585	PRFA01000001:1,528,593..1,531,019(+)	trans-sialidase, Group V
C4B63_27g332	1.13585	PRFA01000027:36,671..39,268(-)	trans-sialidase, Group V
C4B63_126g15	1.13585	PRFA01000126:34,352..37,081(+)	trans-sialidase, Group V
C4B63_13g367	1.09041	PRFA01000013:77,359..80,046(-)	trans-sialidase, Group V
C4B63_25g331	1.04498	PRFA01000025:7,231..9,360(-)	trans-sialidase, Group I
C4B63_41g263	1.04498	PRFA01000041:95,679..98,399(-)	trans-sialidase, Group IV
C4B63_1g806	1.04498	PRFA01000001:1,424,024..1,426,450(-)	trans-sialidase, Group V
C4B63_223g15	1.04498	PRFA01000223:19,069..21,462(+)	trans-sialidase, Group V
C4B63_154g15	0.999546	PRFA01000154:36,403..38,817(+)	trans-sialidase, Group I
C4B63_75g82	0.999546	PRFA01000075:79,061..81,775(-)	trans-sialidase, Group IV
C4B63_5g426	0.999546	PRFA01000005:889,913..892,417(-)	trans-sialidase, Group II
C4B63_50g188	0.999546	PRFA01000050:120,750..123,167(-)	trans-sialidase, Group V
C4B63_3g943	0.954112	PRFA01000003:399,286..401,730(-)	trans-sialidase, Group V
C4B63_5g121	0.954112	PRFA01000005:280,559..283,225(+)	trans-sialidase, Group V
C4B63_5g349	0.954112	PRFA01000005:759,408..762,176(+)	trans-sialidase
C4B63_15g269	0.908678	PRFA01000015:541,746..544,508(+)	trans-sialidase, Group V
C4B63_26g55	0.908678	PRFA01000026:101,992..104,616(+)	trans-sialidase, Group V
C4B63_3g621	0.863244	PRFA01000003:1,068,211..1,070,631(-)	trans-sialidase, Group V
C4B63_35g334	0.863244	PRFA01000035:131,305..134,436(-)	trans-sialidase, Group VIII
C4B63_39g175	0.863244	PRFA01000039:400,674..403,397(-)	trans-sialidase, Group V
C4B63_88g112	0.863244	PRFA01000088:11,255..13,573(-)	trans-sialidase, Group V
C4B63_136g3	0.863244	PRFA01000136:2,972..5,830(+)	trans-sialidase, Group V
C4B63_25g269	0.81781	PRFA01000025:147,303..149,504(-)	trans-sialidase, Group II
C4B63_11g338	0.81781	PRFA01000011:435,810..438,578(-)	trans-sialidase, Group V
C4B63_23g10	0.81781	PRFA01000023:24,644..27,766(+)	trans-sialidase, Group VIII
C4B63_36g364	0.81781	PRFA01000036:27,036..29,462(-)	trans-sialidase, Group V
C4B63_37g122	0.81781	PRFA01000037:267,103..269,520(+)	trans-sialidase, Group V
C4B63_46g181	0.81781	PRFA01000046:23,225..26,356(-)	trans-sialidase, Group VIII
C4B63_117g67	0.81781	PRFA01000117:23,547..26,312(-)	trans-sialidase, Group VIII
C4B63_1g164	0.772376	PRFA01000001:344,645..347,239(+)	trans-sialidase, Group V
C4B63_1g780	0.772376	PRFA01000001:1,497,214..1,499,622(-)	trans-sialidase, Group V
C4B63_3g815	0.772376	PRFA01000003:657,099..659,867(-)	trans-sialidase, Group V
C4B63_3g646	0.772376	PRFA01000003:1,000,130..1,002,976(-)	trans-sialidase, Group V
C4B63_11g425	0.772376	PRFA01000011:251,963..254,827(-)	trans-sialidase, Group VI
C4B63_15g83	0.772376	PRFA01000015:155,134..157,929(+)	trans-sialidase, Group V
C4B63_50g133	0.772376	PRFA01000050:247,425..249,839(-)	trans-sialidase, Group V
C4B63_54g93	0.772376	PRFA01000054:222,852..225,488(+)	trans-sialidase, Group V
C4B63_60g82	0.772376	PRFA01000060:217,271..219,787(-)	trans-sialidase, Group V
C4B63_74g55	0.772376	PRFA01000074:109,921..112,644(+)	trans-sialidase, Group V
C4B63_78g60	0.772376	PRFA01000078:135,231..138,008(+)	trans-sialidase, Group V
C4B63_121g88	0.772376	PRFA01000121:15,470..18,058(-)	trans-sialidase, Group V
C4B63_136g25	0.772376	PRFA01000136:49,782..52,400(+)	trans-sialidase, Group V
C4B63_197g26	0.772376	PRFA01000197:23,058..25,829(-)	trans-sialidase, Group V
C4B63_38g189	0.726942	PRFA01000038:393,107..395,422(+)	trans-sialidase, Group II
C4B63_3g791	0.726942	PRFA01000003:713,840..716,278(-)	trans-sialidase, Group V
C4B63_8g82	0.726942	PRFA01000008:331,806..334,568(+)	trans-sialidase, Group V
C4B63_29g134	0.726942	PRFA01000029:265,459..268,287(+)	trans-sialidase, Group VI
C4B63_33g278	0.726942	PRFA01000033:230,495..233,389(-)	trans-sialidase, Group VI
C4B63_15g332	0.681508	PRFA01000015:445,563..448,286(-)	trans-sialidase, Group V
C4B63_75g77	0.681508	PRFA01000075:89,671..92,166(-)	trans-sialidase, Group II
C4B63_3g300	0.636075	PRFA01000003:678,889..681,321(+)	trans-sialidase, Group V
C4B63_21g180	0.636075	PRFA01000021:483,980..487,126(+)	trans-sialidase, Group VIII
C4B63_47g125	0.636075	PRFA01000047:287,975..290,725(+)	trans-sialidase
C4B63_408g15	0.590641	PRFA01000408:8,827..11,952(-)	trans-sialidase, Group VIII
C4B63_3g467	0.590641	PRFA01000003:1,049,114..1,051,942(+)	trans-sialidase, Group VI
C4B63_5g125	0.590641	PRFA01000005:288,704..291,121(+)	trans-sialidase, Group V
C4B63_15g308	0.590641	PRFA01000015:496,654..499,080(-)	trans-sialidase, Group V
C4B63_24g250	0.590641	PRFA01000024:258,226..260,565(-)	trans-sialidase, Group V
C4B63_27g302	0.590641	PRFA01000027:96,382..98,700(-)	trans-sialidase, Group V
C4B63_28g340	0.590641	PRFA01000028:21,847..25,014(-)	trans-sialidase, Group VIII
C4B63_53g228	0.590641	PRFA01000053:58,002..60,710(-)	trans-sialidase, Group V
C4B63_209g8	0.590641	PRFA01000209:22,653..24,860(+)	trans-sialidase, Group II
C4B63_310g9	0.590641	PRFA01000310:18,676..21,033(+)	trans-sialidase, Group I
C4B63_417g17	0.590641	PRFA01000417:10,113..12,431(-)	trans-sialidase, Group V
C4B63_240g3	0.545207	PRFA01000240:7,695..9,899(+)	trans-sialidase, Group II
C4B63_1g953	0.545207	PRFA01000001:1,059,998..1,062,358(-)	trans-sialidase, Group V
C4B63_1g819	0.545207	PRFA01000001:1,400,040..1,402,877(-)	trans-sialidase, Group VI
C4B63_9g109	0.545207	PRFA01000009:383,649..386,207(+)	trans-sialidase, Group V
C4B63_36g147	0.545207	PRFA01000036:317,078..319,876(+)	trans-sialidase, Group V
C4B63_62g98	0.545207	PRFA01000062:186,458..189,598(+)	trans-sialidase, Group VIII
C4B63_159g15	0.545207	PRFA01000159:43,145..46,288(+)	trans-sialidase, Group VIII
C4B63_5g551	0.499773	PRFA01000005:620,860..623,235(-)	trans-sialidase, Group II
C4B63_105g48	0.499773	PRFA01000105:86,128..88,809(-)	trans-sialidase, Group IV
C4B63_1g436	0.499773	PRFA01000001:1,020,171..1,022,861(+)	trans-sialidase
C4B63_3g957	0.499773	PRFA01000003:369,104..371,902(-)	trans-sialidase, Group VI
C4B63_3g575	0.499773	PRFA01000003:1,176,684..1,179,530(-)	trans-sialidase, Group VI
C4B63_5g752	0.499773	PRFA01000005:118,763..121,180(-)	trans-sialidase, Group V
C4B63_5g538	0.499773	PRFA01000005:645,772..648,177(-)	trans-sialidase, Group V
C4B63_5g298	0.499773	PRFA01000005:660,351..663,050(+)	trans-sialidase, Group V
C4B63_8g313	0.499773	PRFA01000008:640,743..643,469(-)	trans-sialidase
C4B63_22g131	0.499773	PRFA01000022:356,510..359,647(+)	trans-sialidase, Group VIII
C4B63_39g147	0.499773	PRFA01000039:346,738..349,041(+)	trans-sialidase, Group V
C4B63_60g90	0.499773	PRFA01000060:202,644..205,256(-)	trans-sialidase, Group V
C4B63_64g186	0.499773	PRFA01000064:48,361..50,751(-)	trans-sialidase, Group V
C4B63_91g93	0.499773	PRFA01000091:10,336..13,449(-)	trans-sialidase, Group VIII
C4B63_98g38	0.499773	PRFA01000098:104,681..107,059(+)	trans-sialidase, Group II
C4B63_167g33	0.499773	PRFA01000167:38,564..41,086(-)	trans-sialidase, Group II
C4B63_169g40	0.499773	PRFA01000169:20,273..23,149(-)	trans-sialidase, Group VI
C4B63_1g1079	0.454339	PRFA01000001:800,976..803,354(-)	trans-sialidase, Group V
C4B63_3g580	0.454339	PRFA01000003:1,153,054..1,155,921(-)	trans-sialidase, Group VI
C4B63_5g75	0.454339	PRFA01000005:175,807..178,440(+)	trans-sialidase, Group V
C4B63_11g401	0.454339	PRFA01000011:309,664..312,369(-)	trans-sialidase, Group V
C4B63_29g85	0.454339	PRFA01000029:156,081..158,852(+)	trans-sialidase, Group V
C4B63_33g194	0.454339	PRFA01000033:419,910..423,053(+)	trans-sialidase
C4B63_36g369	0.454339	PRFA01000036:14,565..17,399(-)	trans-sialidase, Group VI
C4B63_43g95	0.454339	PRFA01000043:351,035..353,503(+)	trans-sialidase, Group II
C4B63_53g214	0.454339	PRFA01000053:88,917..92,054(-)	trans-sialidase, Group VIII
C4B63_134g38	0.454339	PRFA01000134:68,740..71,205(-)	trans-sialidase, Group V
C4B63_150g12	0.454339	PRFA01000150:43,990..46,857(+)	trans-sialidase, Group V
C4B63_311g10	0.408905	PRFA01000311:9,680..12,058(+)	trans-sialidase, Group V
C4B63_3g1046	0.408905	PRFA01000003:202,145..204,976(-)	trans-sialidase, Group VI
C4B63_3g112	0.408905	PRFA01000003:267,639..270,449(+)	trans-sialidase, Group VI
C4B63_3g1003	0.408905	PRFA01000003:278,419..281,196(-)	trans-sialidase, Group V
C4B63_5g227	0.408905	PRFA01000005:524,130..526,802(+)	trans-sialidase, Group V
C4B63_11g373	0.408905	PRFA01000011:366,611..369,316(-)	trans-sialidase, Group V
C4B63_15g34	0.408905	PRFA01000015:65,751..68,099(+)	trans-sialidase, Group V
C4B63_15g253	0.408905	PRFA01000015:511,580..514,381(+)	trans-sialidase, Group V
C4B63_33g56	0.408905	PRFA01000033:132,818..135,724(+)	trans-sialidase, Group VI
C4B63_37g143	0.408905	PRFA01000037:292,745..295,495(+)	trans-sialidase, Group VI
C4B63_62g172	0.408905	PRFA01000062:87,106..89,847(-)	trans-sialidase, Group VI
C4B63_68g131	0.408905	PRFA01000068:14,729..17,206(-)	trans-sialidase, Group II
C4B63_74g138	0.408905	PRFA01000074:37,843..40,497(-)	trans-sialidase, Group V
C4B63_75g72	0.408905	PRFA01000075:100,520..103,231(-)	trans-sialidase, Group IV
C4B63_90g81	0.408905	PRFA01000090:76,306..79,011(-)	trans-sialidase, Group V
C4B63_169g33	0.408905	PRFA01000169:41,534..44,350(-)	trans-sialidase, Group VI
C4B63_172g39	0.408905	PRFA01000172:19,219..21,837(-)	trans-sialidase, Group V
C4B63_197g31	0.408905	PRFA01000197:14,138..16,909(-)	trans-sialidase, Group V
C4B63_1g1255	0.363471	PRFA01000001:417,964..420,345(-)	trans-sialidase, Group V
C4B63_1g1100	0.363471	PRFA01000001:755,676..759,026(-)	trans-sialidase, Group VIII
C4B63_3g105	0.363471	PRFA01000003:252,648..255,422(+)	trans-sialidase, Group V
C4B63_3g911	0.363471	PRFA01000003:459,296..462,148(-)	trans-sialidase, Group V
C4B63_3g211	0.363471	PRFA01000003:480,378..483,236(+)	trans-sialidase, Group VI
C4B63_3g776	0.363471	PRFA01000003:744,634..747,477(-)	trans-sialidase, Group VI
C4B63_3g582	0.363471	PRFA01000003:1,144,867..1,147,563(-)	trans-sialidase, Group V
C4B63_5g156	0.363471	PRFA01000005:350,247..352,892(+)	trans-sialidase, Group V
C4B63_15g224	0.363471	PRFA01000015:429,885..432,701(+)	trans-sialidase, Group VI
C4B63_26g53	0.363471	PRFA01000026:96,943..99,786(+)	trans-sialidase, Group VI
C4B63_33g293	0.363471	PRFA01000033:209,015..211,597(-)	trans-sialidase, Group V
C4B63_38g310	0.363471	PRFA01000038:19,484..22,597(-)	trans-sialidase, Group VIII
C4B63_39g144	0.363471	PRFA01000039:340,139..342,631(+)	trans-sialidase, Group V
C4B63_47g160	0.363471	PRFA01000047:14,170..17,295(-)	trans-sialidase, Group VIII
C4B63_49g193	0.363471	PRFA01000049:80,674..83,031(-)	trans-sialidase, Group II
C4B63_50g158	0.363471	PRFA01000050:186,960..189,743(-)	trans-sialidase, Group VI
C4B63_51g213	0.363471	PRFA01000051:72,522..74,618(-)	trans-sialidase, Group V
C4B63_54g100	0.363471	PRFA01000054:239,440..242,037(+)	trans-sialidase, Group V
C4B63_68g74	0.363471	PRFA01000068:177,160..180,297(-)	trans-sialidase, Group VIII
C4B63_74g14	0.363471	PRFA01000074:25,644..28,364(+)	trans-sialidase, Group V
C4B63_103g65	0.363471	PRFA01000103:48,989..51,736(-)	trans-sialidase, Group VI
C4B63_147g50	0.363471	PRFA01000147:36,449..38,938(-)	trans-sialidase, Group V
C4B63_259g18	0.363471	PRFA01000259:15,148..17,595(-)	trans-sialidase, Group II
C4B63_36g184	0.318037	PRFA01000036:381,208..383,640(+)	trans-sialidase, Group V
C4B63_209g4	0.318037	PRFA01000209:7,396..9,720(+)	trans-sialidase, Group II
C4B63_1g1397	0.318037	PRFA01000001:23,286..25,469(-)	trans-sialidase, Group II
C4B63_3g951	0.318037	PRFA01000003:382,103..384,862(-)	trans-sialidase, Group VI
C4B63_5g102	0.318037	PRFA01000005:219,635..222,274(+)	trans-sialidase, Group V
C4B63_5g588	0.318037	PRFA01000005:534,577..537,213(-)	trans-sialidase
C4B63_5g241	0.318037	PRFA01000005:544,855..547,620(+)	trans-sialidase, Group V
C4B63_11g151	0.318037	PRFA01000011:339,431..342,262(+)	trans-sialidase, Group VI
C4B63_14g120	0.318037	PRFA01000014:268,964..271,351(+)	trans-sialidase, Group V
C4B63_14g126	0.318037	PRFA01000014:284,930..287,284(+)	trans-sialidase, Group I
C4B63_21g165	0.318037	PRFA01000021:449,596..452,745(+)	trans-sialidase, Group VIII
C4B63_38g303	0.318037	PRFA01000038:50,741..53,128(-)	trans-sialidase, Group II
C4B63_50g170	0.318037	PRFA01000050:166,013..168,424(-)	trans-sialidase, Group V
C4B63_53g178	0.318037	PRFA01000053:157,620..160,289(-)	trans-sialidase, Group V
C4B63_62g3	0.318037	PRFA01000062:2,734..5,142(+)	trans-sialidase, Group V
C4B63_62g159	0.318037	PRFA01000062:104,566..107,274(-)	trans-sialidase, Group V
C4B63_67g71	0.318037	PRFA01000067:128,893..131,679(+)	trans-sialidase, Group VI
C4B63_69g42	0.318037	PRFA01000069:85,977..88,484(+)	trans-sialidase, Group V
C4B63_88g108	0.318037	PRFA01000088:21,140..23,926(-)	trans-sialidase, Group V
C4B63_99g80	0.318037	PRFA01000099:68,660..71,479(-)	trans-sialidase, Group VI
C4B63_125g62	0.318037	PRFA01000125:45,996..48,830(-)	trans-sialidase, Group V
C4B63_125g58	0.318037	PRFA01000125:54,737..57,685(-)	trans-sialidase, Group V
C4B63_325g12	0.318037	PRFA01000325:16,459..19,197(-)	trans-sialidase, Group V
C4B63_159g21	0.272603	PRFA01000159:60,691..63,129(+)	trans-sialidase, Group VIII
C4B63_1g86	0.272603	PRFA01000001:184,965..187,430(+)	trans-sialidase, Group V
C4B63_1g1161	0.272603	PRFA01000001:613,678..616,170(-)	trans-sialidase, Group II
C4B63_1g623	0.272603	PRFA01000001:1,429,413..1,431,923(+)	trans-sialidase, Group V
C4B63_3g981	0.272603	PRFA01000003:322,088..324,541(-)	trans-sialidase, Group V
C4B63_5g643	0.272603	PRFA01000005:382,226..384,967(-)	trans-sialidase, Group V
C4B63_5g222	0.272603	PRFA01000005:513,812..516,502(+)	trans-sialidase, Group V
C4B63_5g368	0.272603	PRFA01000005:797,225..799,906(+)	trans-sialidase, Group V
C4B63_8g93	0.272603	PRFA01000008:349,537..352,257(+)	trans-sialidase, Group V
C4B63_15g504	0.272603	PRFA01000015:95,946..98,780(-)	trans-sialidase, Group V
C4B63_15g460	0.272603	PRFA01000015:175,165..177,900(-)	trans-sialidase, Group V
C4B63_15g125	0.272603	PRFA01000015:218,125..220,956(+)	trans-sialidase, Group VI
C4B63_15g133	0.272603	PRFA01000015:235,571..238,006(+)	trans-sialidase, Group V
C4B63_15g219	0.272603	PRFA01000015:418,340..420,931(+)	trans-sialidase, Group V
C4B63_24g287	0.272603	PRFA01000024:177,254..179,605(-)	trans-sialidase, Group V
C4B63_27g262	0.272603	PRFA01000027:187,857..190,463(-)	trans-sialidase, Group V
C4B63_36g21	0.272603	PRFA01000036:41,068..43,494(+)	trans-sialidase, Group V
C4B63_36g60	0.272603	PRFA01000036:117,965..120,751(+)	trans-sialidase, Group V
C4B63_36g130	0.272603	PRFA01000036:281,647..284,436(+)	trans-sialidase, Group VI
C4B63_63g143	0.272603	PRFA01000063:11,858..14,545(-)	trans-sialidase, Group IV
C4B63_82g111	0.272603	PRFA01000082:18,424..21,192(-)	trans-sialidase, Group IV
C4B63_121g1	0.272603	PRFA01000121:5,338..7,926(+)	trans-sialidase, Group V
C4B63_121g77	0.272603	PRFA01000121:35,888..38,401(-)	trans-sialidase, Group V
C4B63_132g12	0.272603	PRFA01000132:35,008..37,494(+)	trans-sialidase, Group V
C4B63_138g13	0.272603	PRFA01000138:19,736..22,111(+)	trans-sialidase, Group V
C4B63_138g18	0.272603	PRFA01000138:32,424..34,775(+)	trans-sialidase, Group V
C4B63_144g19	0.272603	PRFA01000144:40,803..43,355(+)	trans-sialidase
C4B63_155g14	0.272603	PRFA01000155:45,509..47,569(+)	trans-sialidase, Group II
C4B63_231g14	0.272603	PRFA01000231:22,499..25,630(+)	trans-sialidase, Group VIII
C4B63_309g17	0.272603	PRFA01000309:3,884..5,890(-)	trans-sialidase, Group I
C4B63_117g59	0.227169	PRFA01000117:48,849..51,236(-)	trans-sialidase, Group II
C4B63_8g143	0.227169	PRFA01000008:448,196..450,850(+)	trans-sialidase, Group V
C4B63_1g1308	0.227169	PRFA01000001:309,008..311,614(-)	trans-sialidase
C4B63_3g1059	0.227169	PRFA01000003:163,304..166,105(-)	trans-sialidase, Group V
C4B63_3g865	0.227169	PRFA01000003:552,200..554,899(-)	trans-sialidase, Group V
C4B63_3g400	0.227169	PRFA01000003:896,031..898,712(+)	trans-sialidase, Group VI
C4B63_3g613	0.227169	PRFA01000003:1,088,776..1,091,586(-)	trans-sialidase, Group V
C4B63_5g319	0.227169	PRFA01000005:702,807..705,299(+)	trans-sialidase, Group VI
C4B63_15g397	0.227169	PRFA01000015:297,319..300,126(-)	trans-sialidase, Group V
C4B63_15g353	0.227169	PRFA01000015:404,106..406,940(-)	trans-sialidase, Group VI
C4B63_27g274	0.227169	PRFA01000027:156,366..158,951(-)	trans-sialidase, Group V
C4B63_27g269	0.227169	PRFA01000027:167,251..169,989(-)	trans-sialidase, Group V
C4B63_36g85	0.227169	PRFA01000036:167,148..169,838(+)	trans-sialidase, Group V
C4B63_36g108	0.227169	PRFA01000036:226,462..229,284(+)	trans-sialidase, Group VI
C4B63_53g72	0.227169	PRFA01000053:137,140..139,818(+)	trans-sialidase
C4B63_67g58	0.227169	PRFA01000067:106,515..108,926(+)	trans-sialidase, Group V
C4B63_68g91	0.227169	PRFA01000068:125,009..128,143(-)	trans-sialidase, Group VIII
C4B63_74g124	0.227169	PRFA01000074:69,363..72,014(-)	trans-sialidase
C4B63_94g87	0.227169	PRFA01000094:27,387..30,533(-)	trans-sialidase, Group VIII
C4B63_98g20	0.227169	PRFA01000098:45,238..48,405(+)	trans-sialidase, Group IV
C4B63_99g71	0.227169	PRFA01000099:84,510..86,063(-)	trans-sialidase, Group V
C4B63_115g33	0.227169	PRFA01000115:76,015..78,369(+)	trans-sialidase, Group V
C4B63_152g35	0.227169	PRFA01000152:25,645..27,801(-)	trans-sialidase, Group II
C4B63_157g44	0.227169	PRFA01000157:14,871..17,513(-)	trans-sialidase, Group IV
C4B63_157g40	0.227169	PRFA01000157:25,402..27,789(-)	trans-sialidase, Group II
C4B63_226g20	0.227169	PRFA01000226:18,692..21,841(-)	trans-sialidase, Group VIII
C4B63_14g140	0.181736	PRFA01000014:312,873..315,230(+)	trans-sialidase, Group I
C4B63_1g94	0.181736	PRFA01000001:201,704..204,193(+)	trans-sialidase, Group II
C4B63_1g1263	0.181736	PRFA01000001:399,835..402,318(-)	trans-sialidase, Group V
C4B63_1g1234	0.181736	PRFA01000001:461,729..464,377(-)	trans-sialidase
C4B63_1g352	0.181736	PRFA01000001:841,895..844,546(+)	trans-sialidase
C4B63_1g596	0.181736	PRFA01000001:1,367,788..1,370,457(+)	trans-sialidase
C4B63_3g996	0.181736	PRFA01000003:294,076..296,898(-)	trans-sialidase, Group VI
C4B63_3g205	0.181736	PRFA01000003:469,771..472,542(+)	trans-sialidase, Group VI
C4B63_3g756	0.181736	PRFA01000003:790,315..793,074(-)	trans-sialidase, Group V
C4B63_3g357	0.181736	PRFA01000003:805,024..807,723(+)	trans-sialidase, Group V
C4B63_5g544	0.181736	PRFA01000005:633,086..635,809(-)	trans-sialidase
C4B63_5g385	0.181736	PRFA01000005:845,886..848,555(+)	trans-sialidase, Group V
C4B63_11g419	0.181736	PRFA01000011:262,245..264,827(-)	trans-sialidase, Group V
C4B63_15g107	0.181736	PRFA01000015:196,887..199,667(+)	trans-sialidase, Group VI
C4B63_24g328	0.181736	PRFA01000024:99,777..102,011(-)	trans-sialidase, Group II
C4B63_29g38	0.181736	PRFA01000029:72,571..75,360(+)	trans-sialidase, Group VI
C4B63_29g60	0.181736	PRFA01000029:118,317..121,013(+)	trans-sialidase, Group V
C4B63_33g274	0.181736	PRFA01000033:246,366..249,164(-)	trans-sialidase, Group VI
C4B63_53g171	0.181736	PRFA01000053:180,099..182,711(-)	trans-sialidase, Group V
C4B63_57g39	0.181736	PRFA01000057:188,021..190,708(+)	trans-sialidase, Group V
C4B63_68g121	0.181736	PRFA01000068:32,935..35,403(-)	trans-sialidase, Group II
C4B63_71g6	0.181736	PRFA01000071:16,957..19,779(+)	trans-sialidase, Group VI
C4B63_107g93	0.181736	PRFA01000107:29,245..32,070(-)	trans-sialidase, Group VI
C4B63_107g30	0.181736	PRFA01000107:41,856..45,278(+)	trans-sialidase, Group VIII
C4B63_115g14	0.181736	PRFA01000115:27,481..30,345(+)	trans-sialidase, Group V
C4B63_125g16	0.181736	PRFA01000125:32,837..35,692(+)	trans-sialidase, Group VI
C4B63_126g4	0.181736	PRFA01000126:5,677..8,040(+)	trans-sialidase, Group V
C4B63_131g40	0.181736	PRFA01000131:73,203..75,728(-)	trans-sialidase, Group II
C4B63_141g8	0.181736	PRFA01000141:10,863..13,385(+)	trans-sialidase, Group II
C4B63_157g36	0.181736	PRFA01000157:34,395..36,569(-)	trans-sialidase, Group II
C4B63_159g4	0.181736	PRFA01000159:11,558..14,065(+)	trans-sialidase, Group II
C4B63_169g36	0.181736	PRFA01000169:32,421..35,144(-)	trans-sialidase, Group V
C4B63_1g240	0.136302	PRFA01000001:519,590..522,124(+)	trans-sialidase, Group V
C4B63_1g1091	0.136302	PRFA01000001:776,214..778,874(-)	trans-sialidase
C4B63_1g1075	0.136302	PRFA01000001:810,382..813,084(-)	trans-sialidase, Group V
C4B63_1g383	0.136302	PRFA01000001:916,531..919,029(+)	trans-sialidase, Group V
C4B63_1g388	0.136302	PRFA01000001:926,841..929,405(+)	trans-sialidase, Group V
C4B63_1g965	0.136302	PRFA01000001:1,031,046..1,033,706(-)	trans-sialidase
C4B63_1g935	0.136302	PRFA01000001:1,088,876..1,091,557(-)	trans-sialidase, Group V
C4B63_3g843	0.136302	PRFA01000003:596,302..599,070(-)	trans-sialidase, Group V
C4B63_3g495	0.136302	PRFA01000003:1,098,875..1,101,589(+)	trans-sialidase, Group VI
C4B63_5g26	0.136302	PRFA01000005:65,051..67,402(+)	trans-sialidase, Group V
C4B63_5g693	0.136302	PRFA01000005:242,164..244,839(-)	trans-sialidase, Group V
C4B63_5g248	0.136302	PRFA01000005:561,173..563,518(+)	trans-sialidase, Group V
C4B63_8g97	0.136302	PRFA01000008:358,557..361,184(+)	trans-sialidase, Group VI
C4B63_8g168	0.136302	PRFA01000008:500,768..503,344(+)	trans-sialidase, Group V
C4B63_15g494	0.136302	PRFA01000015:121,875..124,634(-)	trans-sialidase, Group VI
C4B63_15g77	0.136302	PRFA01000015:143,536..146,259(+)	trans-sialidase, Group V
C4B63_15g411	0.136302	PRFA01000015:270,887..273,598(-)	trans-sialidase, Group V
C4B63_15g314	0.136302	PRFA01000015:484,960..487,665(-)	trans-sialidase, Group V
C4B63_16g33	0.136302	PRFA01000016:65,468..67,915(+)	trans-sialidase, Group VIII
C4B63_16g202	0.136302	PRFA01000016:546,227..548,788(+)	trans-sialidase, Group II
C4B63_29g449	0.136302	PRFA01000029:21,292..24,078(-)	trans-sialidase, Group VI
C4B63_29g325	0.136302	PRFA01000029:255,152..257,977(-)	trans-sialidase, Group V
C4B63_33g308	0.136302	PRFA01000033:175,475..178,468(-)	trans-sialidase, Group V
C4B63_36g57	0.136302	PRFA01000036:108,707..111,454(+)	trans-sialidase, Group VI
C4B63_36g101	0.136302	PRFA01000036:200,890..203,553(+)	trans-sialidase, Group VI
C4B63_36g112	0.136302	PRFA01000036:236,314..239,136(+)	trans-sialidase, Group V
C4B63_50g228	0.136302	PRFA01000050:46,964..49,708(-)	trans-sialidase, Group VI
C4B63_50g208	0.136302	PRFA01000050:75,968..78,724(-)	trans-sialidase, Group VI
C4B63_50g148	0.136302	PRFA01000050:208,684..211,560(-)	trans-sialidase, Group V
C4B63_53g59	0.136302	PRFA01000053:112,117..114,762(+)	trans-sialidase
C4B63_58g229	0.136302	PRFA01000058:18,952..21,339(-)	trans-sialidase, Group II
C4B63_62g140	0.136302	PRFA01000062:134,851..137,487(-)	trans-sialidase, Group VI
C4B63_64g118	0.136302	PRFA01000064:212,311..214,998(-)	trans-sialidase, Group V
C4B63_65g19	0.136302	PRFA01000065:32,052..35,189(+)	trans-sialidase, Group VIII
C4B63_65g103	0.136302	PRFA01000065:160,338..163,001(+)	trans-sialidase, Group VI
C4B63_65g113	0.136302	PRFA01000065:172,113..174,512(+)	trans-sialidase, Group V
C4B63_67g15	0.136302	PRFA01000067:24,346..27,126(+)	trans-sialidase, Group VI
C4B63_68g107	0.136302	PRFA01000068:70,118..72,646(-)	trans-sialidase, Group II
C4B63_69g50	0.136302	PRFA01000069:105,048..107,204(+)	trans-sialidase, Group I
C4B63_71g133	0.136302	PRFA01000071:126,699..129,329(-)	trans-sialidase, Group VI
C4B63_107g78	0.136302	PRFA01000107:64,123..66,963(-)	trans-sialidase, Group VI
C4B63_109g60	0.136302	PRFA01000109:61,279..63,903(-)	trans-sialidase, Group IV
C4B63_115g23	0.136302	PRFA01000115:58,299..60,941(+)	trans-sialidase, Group V
C4B63_136g12	0.136302	PRFA01000136:27,750..30,608(+)	trans-sialidase, Group V
C4B63_144g11	0.136302	PRFA01000144:21,477..24,029(+)	trans-sialidase, Group V
C4B63_145g8	0.136302	PRFA01000145:10,715..13,483(+)	trans-sialidase, Group IV
C4B63_153g14	0.136302	PRFA01000153:44,717..47,857(+)	trans-sialidase, Group VIII
C4B63_160g23	0.136302	PRFA01000160:44,838..47,285(+)	trans-sialidase, Group VIII
C4B63_196g41	0.136302	PRFA01000196:22,503..24,860(-)	trans-sialidase, Group V
C4B63_319g8	0.136302	PRFA01000319:16,126..18,264(+)	trans-sialidase, Group II
C4B63_46g117	0.0908678	PRFA01000046:325,822..327,147(+)	trans-sialidase, Group V
C4B63_26g29	0.0908678	PRFA01000026:59,896..63,087(+)	trans-sialidase, Group I
C4B63_1g106	0.0908678	PRFA01000001:231,804..234,290(+)	trans-sialidase, Group II
C4B63_1g282	0.0908678	PRFA01000001:658,799..661,288(+)	trans-sialidase, Group V
C4B63_1g1122	0.0908678	PRFA01000001:701,698..704,346(-)	trans-sialidase, Group V
C4B63_1g998	0.0908678	PRFA01000001:978,056..979,687(-)	trans-sialidase, Group V
C4B63_1g941	0.0908678	PRFA01000001:1,078,012..1,080,369(-)	trans-sialidase, Group V
C4B63_1g931	0.0908678	PRFA01000001:1,097,723..1,100,407(-)	trans-sialidase, Group V
C4B63_1g546	0.0908678	PRFA01000001:1,268,981..1,271,719(+)	trans-sialidase, Group V
C4B63_1g564	0.0908678	PRFA01000001:1,298,212..1,301,373(+)	trans-sialidase, Group VIII
C4B63_1g791	0.0908678	PRFA01000001:1,458,769..1,461,327(-)	trans-sialidase
C4B63_1g729	0.0908678	PRFA01000001:1,610,714..1,613,038(-)	trans-sialidase, Group V
C4B63_3g799	0.0908678	PRFA01000003:697,715..700,489(-)	trans-sialidase, Group V
C4B63_3g767	0.0908678	PRFA01000003:765,223..768,033(-)	trans-sialidase, Group V
C4B63_3g392	0.0908678	PRFA01000003:877,940..880,777(+)	trans-sialidase, Group VI
C4B63_3g449	0.0908678	PRFA01000003:1,015,346..1,018,144(+)	trans-sialidase, Group V
C4B63_3g618	0.0908678	PRFA01000003:1,078,365..1,081,166(-)	trans-sialidase, Group V
C4B63_3g501	0.0908678	PRFA01000003:1,111,499..1,114,318(+)	trans-sialidase, Group VI
C4B63_5g778	0.0908678	PRFA01000005:31,798..34,140(-)	trans-sialidase, Group V
C4B63_5g117	0.0908678	PRFA01000005:269,107..272,274(+)	trans-sialidase, Group VIII
C4B63_5g307	0.0908678	PRFA01000005:678,652..681,366(+)	trans-sialidase, Group V
C4B63_9g97	0.0908678	PRFA01000009:364,216..366,936(+)	trans-sialidase, Group V
C4B63_11g122	0.0908678	PRFA01000011:279,605..282,316(+)	trans-sialidase, Group VI
C4B63_11g147	0.0908678	PRFA01000011:328,452..331,562(+)	trans-sialidase, Group VIII
C4B63_15g27	0.0908678	PRFA01000015:55,105..57,777(+)	trans-sialidase
C4B63_15g382	0.0908678	PRFA01000015:335,816..338,524(-)	trans-sialidase, Group VI
C4B63_15g370	0.0908678	PRFA01000015:363,236..365,935(-)	trans-sialidase, Group VI
C4B63_16g142	0.0908678	PRFA01000016:405,252..407,780(+)	trans-sialidase, Group II
C4B63_29g15	0.0908678	PRFA01000029:36,775..39,528(+)	trans-sialidase, Group V
C4B63_29g328	0.0908678	PRFA01000029:247,342..250,224(-)	trans-sialidase, Group VI
C4B63_32g139	0.0908678	PRFA01000032:377,181..380,183(+)	trans-sialidase, Group VI
C4B63_33g276	0.0908678	PRFA01000033:238,455..241,319(-)	trans-sialidase, Group VI
C4B63_36g54	0.0908678	PRFA01000036:102,343..105,114(+)	trans-sialidase, Group V
C4B63_36g195	0.0908678	PRFA01000036:399,262..402,051(+)	trans-sialidase, Group V
C4B63_39g128	0.0908678	PRFA01000039:310,125..312,812(+)	trans-sialidase, Group V
C4B63_50g180	0.0908678	PRFA01000050:143,431..145,842(-)	trans-sialidase, Group V
C4B63_50g142	0.0908678	PRFA01000050:224,822..227,233(-)	trans-sialidase, Group V
C4B63_67g211	0.0908678	PRFA01000067:13,691..16,297(-)	trans-sialidase, Group VI
C4B63_67g85	0.0908678	PRFA01000067:153,686..156,049(+)	trans-sialidase, Group II
C4B63_86g82	0.0908678	PRFA01000086:55,855..58,410(-)	trans-sialidase, Group V
C4B63_94g80	0.0908678	PRFA01000094:56,651..59,800(-)	trans-sialidase, Group VIII
C4B63_103g75	0.0908678	PRFA01000103:24,336..27,056(-)	trans-sialidase, Group VI
C4B63_105g64	0.0908678	PRFA01000105:30,619..33,087(-)	trans-sialidase, Group II
C4B63_120g24	0.0908678	PRFA01000120:33,749..36,334(+)	trans-sialidase, Group V
C4B63_121g82	0.0908678	PRFA01000121:24,631..27,396(-)	trans-sialidase, Group VI
C4B63_122g41	0.0908678	PRFA01000122:67,303..70,059(-)	trans-sialidase, Group V
C4B63_125g45	0.0908678	PRFA01000125:73,196..75,904(-)	trans-sialidase, Group V
C4B63_66g68	0.0454339	PRFA01000066:163,226..165,697(+)	trans-sialidase, Group V
C4B63_240g5	0.0454339	PRFA01000240:13,637..15,841(+)	trans-sialidase, Group II
C4B63_1g1312	0.0454339	PRFA01000001:298,097..300,733(-)	trans-sialidase
C4B63_1g226	0.0454339	PRFA01000001:491,561..494,215(+)	trans-sialidase, Group V
C4B63_1g302	0.0454339	PRFA01000001:713,493..715,808(+)	trans-sialidase, Group VIII
C4B63_1g1097	0.0454339	PRFA01000001:764,602..767,766(-)	trans-sialidase, Group VIII
C4B63_1g1052	0.0454339	PRFA01000001:860,465..863,113(-)	trans-sialidase, Group V
C4B63_1g508	0.0454339	PRFA01000001:1,193,105..1,195,450(+)	trans-sialidase, Group V
C4B63_1g604	0.0454339	PRFA01000001:1,387,028..1,389,694(+)	trans-sialidase
C4B63_3g1077	0.0454339	PRFA01000003:128,207..130,702(-)	trans-sialidase, Group V
C4B63_3g916	0.0454339	PRFA01000003:448,460..451,192(-)	trans-sialidase, Group V
C4B63_3g897	0.0454339	PRFA01000003:491,854..494,664(-)	trans-sialidase, Group VI
C4B63_3g405	0.0454339	PRFA01000003:907,102..909,897(+)	trans-sialidase, Group V
C4B63_3g561	0.0454339	PRFA01000003:1,205,452..1,208,154(-)	trans-sialidase
C4B63_5g782	0.0454339	PRFA01000005:21,136..23,484(-)	trans-sialidase, Group V
C4B63_5g152	0.0454339	PRFA01000005:341,940..344,591(+)	trans-sialidase, Group V
C4B63_8g186	0.0454339	PRFA01000008:547,399..550,056(+)	trans-sialidase
C4B63_8g254	0.0454339	PRFA01000008:726,875..729,700(+)	trans-sialidase, Group VI
C4B63_11g252	0.0454339	PRFA01000011:569,989..572,829(+)	trans-sialidase, Group VI
C4B63_15g137	0.0454339	PRFA01000015:242,876..245,635(+)	trans-sialidase, Group V
C4B63_15g360	0.0454339	PRFA01000015:380,347..383,175(-)	trans-sialidase, Group VI
C4B63_26g37	0.0454339	PRFA01000026:74,950..77,814(+)	trans-sialidase, Group V
C4B63_29g89	0.0454339	PRFA01000029:167,122..169,728(+)	trans-sialidase, Group V
C4B63_32g187	0.0454339	PRFA01000032:387,776..390,559(-)	trans-sialidase, Group V
C4B63_33g41	0.0454339	PRFA01000033:93,377..96,139(+)	trans-sialidase, Group V
C4B63_33g44	0.0454339	PRFA01000033:101,376..104,069(+)	trans-sialidase, Group V
C4B63_33g61	0.0454339	PRFA01000033:143,885..146,455(+)	trans-sialidase, Group V
C4B63_36g117	0.0454339	PRFA01000036:249,416..252,202(+)	trans-sialidase, Group V
C4B63_36g228	0.0454339	PRFA01000036:345,700..348,540(-)	trans-sialidase, Group VI
C4B63_37g68	0.0454339	PRFA01000037:175,326..177,977(+)	trans-sialidase, Group VI
C4B63_37g181	0.0454339	PRFA01000037:354,996..357,737(+)	trans-sialidase, Group VI
C4B63_49g216	0.0454339	PRFA01000049:30,073..32,253(-)	trans-sialidase, Group II
C4B63_50g176	0.0454339	PRFA01000050:152,737..155,499(-)	trans-sialidase, Group VI
C4B63_50g167	0.0454339	PRFA01000050:174,364..177,246(-)	trans-sialidase, Group V
C4B63_50g139	0.0454339	PRFA01000050:234,130..236,778(-)	trans-sialidase, Group VI
C4B63_51g225	0.0454339	PRFA01000051:39,854..40,951(-)	trans-sialidase, Group V
C4B63_52g93	0.0454339	PRFA01000052:267,382..269,550(-)	trans-sialidase
C4B63_59g231	0.0454339	PRFA01000059:63,141..65,747(-)	trans-sialidase, Group V
C4B63_64g57	0.0454339	PRFA01000064:97,929..100,406(+)	trans-sialidase, Group V
C4B63_65g151	0.0454339	PRFA01000065:185,588..188,218(-)	trans-sialidase, Group VI
C4B63_65g127	0.0454339	PRFA01000065:195,966..198,590(+)	trans-sialidase, Group VI
C4B63_71g118	0.0454339	PRFA01000071:153,176..155,929(-)	trans-sialidase, Group VI
C4B63_71g106	0.0454339	PRFA01000071:173,717..176,458(-)	trans-sialidase, Group VI
C4B63_74g119	0.0454339	PRFA01000074:79,714..82,380(-)	trans-sialidase, Group V
C4B63_93g4	0.0454339	PRFA01000093:5,685..7,958(+)	trans-sialidase, Group II
C4B63_96g82	0.0454339	PRFA01000096:37,556..40,369(-)	trans-sialidase, Group VI
C4B63_96g77	0.0454339	PRFA01000096:45,671..48,469(-)	trans-sialidase, Group V
C4B63_98g6	0.0454339	PRFA01000098:13,713..16,055(+)	trans-sialidase
C4B63_98g34	0.0454339	PRFA01000098:82,037..84,211(+)	trans-sialidase
C4B63_106g72	0.0454339	PRFA01000106:24,160..26,715(-)	trans-sialidase, Group V
C4B63_106g54	0.0454339	PRFA01000106:58,177..60,906(-)	trans-sialidase, Group V
C4B63_106g50	0.0454339	PRFA01000106:67,956..70,514(-)	trans-sialidase, Group V
C4B63_109g65	0.0454339	PRFA01000109:48,316..50,940(-)	trans-sialidase, Group IV
C4B63_126g23	0.0454339	PRFA01000126:51,573..54,305(+)	trans-sialidase, Group V
C4B63_139g40	0.0454339	PRFA01000139:58,847..61,636(-)	trans-sialidase, Group V
C4B63_151g45	0.0454339	PRFA01000151:30,993..33,581(-)	trans-sialidase, Group VI
C4B63_167g40	0.0454339	PRFA01000167:11,636..14,146(-)	trans-sialidase, Group I
C4B63_232g21	0.0454339	PRFA01000232:33,473..35,635(-)	trans-sialidase, Group I
C4B63_319g9	0.0454339	PRFA01000319:20,144..22,396(+)	trans-sialidase, Group II
C4B63_1g1147	0	PRFA01000001:641,015..643,501(-)	trans-sialidase
C4B63_1g402	0	PRFA01000001:949,433..951,931(+)	trans-sialidase, Group VI
C4B63_3g938	0	PRFA01000003:407,483..410,248(-)	trans-sialidase, Group VI
C4B63_3g888	0	PRFA01000003:511,751..514,615(-)	trans-sialidase, Group VI
C4B63_3g667	0	PRFA01000003:958,812..961,604(-)	trans-sialidase, Group V
C4B63_8g102	0	PRFA01000008:371,675..374,452(+)	trans-sialidase, Group V
C4B63_8g123	0	PRFA01000008:409,931..412,708(+)	trans-sialidase, Group V
C4B63_8g129	0	PRFA01000008:423,432..426,200(+)	trans-sialidase, Group VI
C4B63_8g134	0	PRFA01000008:432,284..435,055(+)	trans-sialidase, Group V
C4B63_8g148	0	PRFA01000008:456,830..459,484(+)	trans-sialidase, Group V
C4B63_8g152	0	PRFA01000008:465,481..468,219(+)	trans-sialidase, Group V
C4B63_8g156	0	PRFA01000008:474,210..476,894(+)	trans-sialidase, Group V
C4B63_8g159	0	PRFA01000008:482,941..485,679(+)	trans-sialidase, Group V
C4B63_9g94	0	PRFA01000009:354,482..357,196(+)	trans-sialidase, Group V
C4B63_11g169	0	PRFA01000011:381,232..384,072(+)	trans-sialidase, Group VI
C4B63_11g196	0	PRFA01000011:464,535..467,645(+)	trans-sialidase, Group VIII
C4B63_14g128	0	PRFA01000014:289,585..291,942(+)	trans-sialidase, Group I
C4B63_15g501	0	PRFA01000015:104,750..107,503(-)	trans-sialidase, Group V
C4B63_15g380	0	PRFA01000015:343,422..346,205(-)	trans-sialidase, Group V
C4B63_25g29	0	PRFA01000025:122,166..124,295(+)	trans-sialidase, Group I
C4B63_29g428	0	PRFA01000029:57,149..59,896(-)	trans-sialidase, Group V
C4B63_29g49	0	PRFA01000029:89,914..92,619(+)	trans-sialidase, Group V
C4B63_29g57	0	PRFA01000029:110,291..112,978(+)	trans-sialidase, Group V
C4B63_33g67	0	PRFA01000033:151,461..154,274(+)	trans-sialidase, Group V
C4B63_34g136	0	PRFA01000034:371,906..374,566(+)	trans-sialidase, Group V
C4B63_36g308	0	PRFA01000036:156,563..159,400(-)	trans-sialidase, Group VI
C4B63_36g87	0	PRFA01000036:174,832..177,543(+)	trans-sialidase, Group V
C4B63_36g92	0	PRFA01000036:186,262..189,051(+)	trans-sialidase, Group V
C4B63_36g122	0	PRFA01000036:261,764..264,559(+)	trans-sialidase, Group V
C4B63_36g171	0	PRFA01000036:356,299..359,010(+)	trans-sialidase, Group V
C4B63_36g177	0	PRFA01000036:367,718..370,150(+)	trans-sialidase, Group V
C4B63_37g376	0	PRFA01000037:113,008..115,200(-)	trans-sialidase, Group II
C4B63_40g167	0	PRFA01000040:339,527..341,773(+)	trans-sialidase, Group II
C4B63_40g169	0	PRFA01000040:343,671..345,917(+)	trans-sialidase, Group II
C4B63_40g171	0	PRFA01000040:347,805..349,976(+)	trans-sialidase, Group II
C4B63_40g175	0	PRFA01000040:356,070..358,319(+)	trans-sialidase, Group II
C4B63_40g176	0	PRFA01000040:360,202..362,454(+)	trans-sialidase, Group II
C4B63_40g178	0	PRFA01000040:368,467..370,719(+)	trans-sialidase, Group II
C4B63_40g179	0	PRFA01000040:372,595..374,847(+)	trans-sialidase, Group II
C4B63_50g240	0	PRFA01000050:26,337..29,087(-)	trans-sialidase, Group VI
C4B63_59g222	0	PRFA01000059:81,316..83,922(-)	trans-sialidase, Group V
C4B63_62g184	0	PRFA01000062:70,265..71,509(-)	trans-sialidase, Group VI
C4B63_62g100	0	PRFA01000062:191,734..194,241(+)	trans-sialidase, Group II
C4B63_62g102	0	PRFA01000062:196,452..198,959(+)	trans-sialidase, Group II
C4B63_62g108	0	PRFA01000062:205,890..208,397(+)	trans-sialidase, Group II
C4B63_65g44	0	PRFA01000065:67,665..70,034(+)	trans-sialidase, Group II
C4B63_66g53	0	PRFA01000066:127,409..130,255(+)	trans-sialidase, Group VI
C4B63_66g71	0	PRFA01000066:169,801..172,128(+)	trans-sialidase
C4B63_67g166	0	PRFA01000067:85,049..87,790(-)	trans-sialidase, Group VI
C4B63_71g168	0	PRFA01000071:85,103..87,766(-)	trans-sialidase, Group VI
C4B63_93g6	0	PRFA01000093:9,838..12,111(+)	trans-sialidase, Group II
C4B63_94g93	0	PRFA01000094:15,786..18,260(-)	trans-sialidase, Group II
C4B63_96g86	0	PRFA01000096:29,613..32,306(-)	trans-sialidase, Group V
C4B63_96g34	0	PRFA01000096:71,408..74,029(+)	trans-sialidase, Group V
C4B63_106g60	0	PRFA01000106:48,609..49,706(-)	trans-sialidase, Group V
C4B63_111g8	0	PRFA01000111:11,804..14,401(+)	trans-sialidase, Group V
C4B63_115g3	0	PRFA01000115:5,868..8,519(+)	trans-sialidase, Group V
C4B63_125g69	0	PRFA01000125:22,157..25,021(-)	trans-sialidase, Group VI
C4B63_132g23	0	PRFA01000132:62,500..64,827(+)	trans-sialidase
C4B63_135g24	0	PRFA01000135:60,711..63,152(-)	trans-sialidase, Group V
C4B63_139g8	0	PRFA01000139:18,325..21,027(+)	trans-sialidase, Group V
C4B63_139g14	0	PRFA01000139:35,484..38,189(+)	trans-sialidase, Group V
C4B63_139g34	0	PRFA01000139:71,522..74,359(-)	trans-sialidase, Group VI
C4B63_144g5	0	PRFA01000144:6,744..8,936(+)	trans-sialidase, Group I
C4B63_151g44	0	PRFA01000151:35,712..38,300(-)	trans-sialidase, Group VI
C4B63_173g10	0	PRFA01000173:16,520..17,683(+)	trans-sialidase, Group II
C4B63_244g6	0	PRFA01000244:10,600..12,729(+)	trans-sialidase, Group I
C4B63_244g7	0	PRFA01000244:13,906..16,035(+)	trans-sialidase, Group I
C4B63_244g8	0	PRFA01000244:17,211..19,340(+)	trans-sialidase, Group I
C4B63_244g9	0	PRFA01000244:20,515..22,644(+)	trans-sialidase, Group I
C4B63_305g4	0	PRFA01000305:12,691..14,874(+)	trans-sialidase, Group II
C4B63_387g18	0	PRFA01000387:7,056..9,305(-)	trans-sialidase, Group II
C4B63_387g14	0	PRFA01000387:15,340..17,589(-)	trans-sialidase, Group II

## Sheet: b) trypo 0
Supplementary File 4. Percentage of cells in which each TcTS is expressed in trypomastigote cell population
b) Trypomastigote cells corresponding to the trypo_ 0 cluster
Gene	Percent_Expressed	Genomic Location	Product Description
C4B63_84g32	88.9545	PRFA01000084:112,926..115,919(+)	trans-sialidase, Group VIII
C4B63_260g23	83.5582	PRFA01000260:12,692..15,079(-)	trans-sialidase, Group II
C4B63_86g95	74.6206	PRFA01000086:19,909..22,740(-)	trans-sialidase, Group III
C4B63_22g135	73.5245	PRFA01000022:368,932..371,229(+)	trans-sialidase, Group V
C4B63_156g20	73.5245	PRFA01000156:62,715..65,828(+)	trans-sialidase, Group VIII
C4B63_40g138	68.887	PRFA01000040:281,437..283,686(+)	trans-sialidase, Group II
C4B63_14g229	64.5025	PRFA01000014:514,917..517,280(+)	trans-sialidase, Group II
C4B63_419g2	63.575	PRFA01000419:7,079..9,895(+)	trans-sialidase
C4B63_65g71	60.0337	PRFA01000065:109,450..111,816(+)	trans-sialidase, Group II
C4B63_135g26	59.9494	PRFA01000135:56,137..58,578(-)	trans-sialidase, Group V
C4B63_145g11	57.6728	PRFA01000145:18,864..21,878(+)	trans-sialidase, Group III
C4B63_361g15	55.7336	PRFA01000361:7,220..9,532(-)	trans-sialidase, Group V
C4B63_1g480	55.1433	PRFA01000001:1,136,009..1,138,369(+)	trans-sialidase, Group V
C4B63_49g210	53.5413	PRFA01000049:41,857..44,958(-)	trans-sialidase, Group VIII
C4B63_51g210	53.3727	PRFA01000051:83,519..85,831(-)	trans-sialidase, Group V
C4B63_145g23	52.9511	PRFA01000145:44,960..47,980(+)	trans-sialidase, Group III
C4B63_47g92	52.6981	PRFA01000047:221,928..224,669(+)	trans-sialidase
C4B63_47g122	52.5295	PRFA01000047:276,278..279,022(+)	trans-sialidase
C4B63_568g1	50.8432	PRFA01000568:701..3,013(+)	trans-sialidase, Group II
C4B63_35g347	49.9157	PRFA01000035:98,010..101,138(-)	trans-sialidase, Group VIII
C4B63_156g18	49.4098	PRFA01000156:46,341..49,283(+)	trans-sialidase
C4B63_35g193	48.145	PRFA01000035:399,901..403,020(+)	trans-sialidase, Group VIII
C4B63_1g82	47.4705	PRFA01000001:172,679..175,297(+)	trans-sialidase, Group II
C4B63_72g38	47.0489	PRFA01000072:171,093..173,552(+)	trans-sialidase, Group II
C4B63_8g282	46.3744	PRFA01000008:699,125..701,524(-)	trans-sialidase, Group V
C4B63_8g108	45.4469	PRFA01000008:385,177..387,945(+)	trans-sialidase, Group VI
C4B63_41g261	44.1821	PRFA01000041:100,724..103,444(-)	trans-sialidase, Group IV
C4B63_8g77	43.5919	PRFA01000008:322,968..325,751(+)	trans-sialidase, Group VI
C4B63_73g11	43.4233	PRFA01000073:19,000..21,672(+)	trans-sialidase, Group IV
C4B63_1g788	42.9174	PRFA01000001:1,471,299..1,474,469(-)	trans-sialidase, Group VIII
C4B63_387g16	41.3153	PRFA01000387:11,197..13,446(-)	trans-sialidase, Group II
C4B63_124g40	39.5447	PRFA01000124:73,808..76,945(+)	trans-sialidase, Group VIII
C4B63_68g103	39.3761	PRFA01000068:89,317..91,599(-)	trans-sialidase, Group II
C4B63_77g67	38.4486	PRFA01000077:131,426..134,452(+)	trans-sialidase, Group III
C4B63_77g40	38.1113	PRFA01000077:83,041..86,067(+)	trans-sialidase, Group III
C4B63_156g6	37.9427	PRFA01000156:11,865..14,609(+)	trans-sialidase
C4B63_455g9	37.4368	PRFA01000455:8,884..11,385(+)	trans-sialidase, Group VII
C4B63_1g368	37.3524	PRFA01000001:870,745..873,915(+)	trans-sialidase, Group VIII
C4B63_131g42	36.9309	PRFA01000131:68,466..70,952(-)	trans-sialidase, Group II
C4B63_155g17	36.8465	PRFA01000155:55,219..57,597(+)	trans-sialidase, Group II
C4B63_164g14	36.3406	PRFA01000164:36,856..39,270(+)	trans-sialidase, Group II
C4B63_145g21	36.172	PRFA01000145:36,872..39,640(+)	trans-sialidase, Group IV
C4B63_5g740	36.0034	PRFA01000005:141,333..143,702(-)	trans-sialidase, Group V
C4B63_105g53	35.8347	PRFA01000105:59,307..62,435(-)	trans-sialidase, Group VIII
C4B63_1g1102	35.5818	PRFA01000001:746,689..749,064(-)	trans-sialidase, Group V
C4B63_34g137	35.0759	PRFA01000034:376,631..379,315(+)	trans-sialidase, Group IV
C4B63_31g119	33.8111	PRFA01000031:348,644..350,296(+)	trans-sialidase, Group II
C4B63_64g80	32.968	PRFA01000064:142,317..144,785(+)	trans-sialidase, Group V
C4B63_119g19	32.968	PRFA01000119:44,859..47,987(+)	trans-sialidase, Group VIII
C4B63_75g105	32.7993	PRFA01000075:20,689..23,199(-)	trans-sialidase, Group II
C4B63_77g50	32.5464	PRFA01000077:101,051..103,819(+)	trans-sialidase, Group IV
C4B63_67g26	32.3777	PRFA01000067:42,473..44,839(+)	trans-sialidase, Group II
C4B63_35g363	32.1248	PRFA01000035:64,808..68,272(-)	trans-sialidase, Group VIII
C4B63_42g262	31.5346	PRFA01000042:17,498..20,617(-)	trans-sialidase, Group VIII
C4B63_5g393	31.1973	PRFA01000005:861,389..863,737(+)	trans-sialidase, Group V
C4B63_27g266	30.1855	PRFA01000027:178,047..180,377(-)	trans-sialidase, Group V
C4B63_50g98	29.3423	PRFA01000050:274,407..276,740(+)	trans-sialidase, Group V
C4B63_5g433	29.1737	PRFA01000005:879,574..881,370(-)	trans-sialidase, Group V
C4B63_1g201	28.7521	PRFA01000001:439,502..441,838(+)	trans-sialidase, Group V
C4B63_1g473	28.4148	PRFA01000001:1,118,975..1,121,704(+)	trans-sialidase
C4B63_154g5	28.4148	PRFA01000154:9,166..11,688(+)	trans-sialidase, Group II
C4B63_162g7	28.4148	PRFA01000162:30,539..33,244(+)	trans-sialidase, Group II
C4B63_37g415	27.5717	PRFA01000037:14,305..17,439(-)	trans-sialidase, Group VIII
C4B63_157g46	27.4874	PRFA01000157:4,994..7,174(-)	trans-sialidase, Group II
C4B63_131g47	27.1501	PRFA01000131:45,359..47,881(-)	trans-sialidase, Group II
C4B63_5g493	26.1383	PRFA01000005:732,084..734,423(-)	trans-sialidase, Group V
C4B63_23g158	25.8853	PRFA01000023:465,478..468,426(-)	trans-sialidase
C4B63_5g376	25.7167	PRFA01000005:818,787..821,297(+)	trans-sialidase, Group V
C4B63_71g189	25.5481	PRFA01000071:51,916..54,288(-)	trans-sialidase, Group II
C4B63_311g19	25.4637	PRFA01000311:19,592..22,063(-)	trans-sialidase, Group V
C4B63_105g66	23.8617	PRFA01000105:19,602..22,724(-)	trans-sialidase, Group VIII
C4B63_105g45	23.1872	PRFA01000105:96,607..99,732(-)	trans-sialidase, Group VIII
C4B63_260g20	22.8499	PRFA01000260:21,258..23,423(-)	trans-sialidase, Group II
C4B63_69g34	22.7656	PRFA01000069:71,267..73,945(+)	trans-sialidase, Group I
C4B63_10g538	21.5008	PRFA01000010:13,600..15,972(-)	trans-sialidase, Group II
C4B63_111g19	21.1636	PRFA01000111:39,478..42,114(+)	trans-sialidase, Group V
C4B63_59g52	20.9949	PRFA01000059:53,109..55,514(+)	trans-sialidase, Group V
C4B63_14g138	20.8263	PRFA01000014:308,216..310,573(+)	trans-sialidase, Group I
C4B63_64g142	20.8263	PRFA01000064:163,872..165,713(-)	trans-sialidase, Group V
C4B63_360g18	20.742	PRFA01000360:4,370..6,733(-)	trans-sialidase, Group II
C4B63_119g31	20.5734	PRFA01000119:63,765..66,887(+)	trans-sialidase, Group VIII
C4B63_305g8	20.3204	PRFA01000305:21,580..23,763(+)	trans-sialidase, Group II
C4B63_34g140	20.2361	PRFA01000034:387,220..389,931(+)	trans-sialidase, Group IV
C4B63_35g136	19.4772	PRFA01000035:284,751..287,267(+)	trans-sialidase, Group V
C4B63_174g27	18.9713	PRFA01000174:39,635..42,118(-)	trans-sialidase, Group V
C4B63_105g61	18.4654	PRFA01000105:38,825..41,008(-)	trans-sialidase, Group II
C4B63_109g61	18.2125	PRFA01000109:56,679..58,856(-)	trans-sialidase, Group II
C4B63_119g5	17.7066	PRFA01000119:12,073..15,201(+)	trans-sialidase, Group VIII
C4B63_39g233	17.4536	PRFA01000039:291,339..294,047(-)	trans-sialidase, Group V
C4B63_35g131	17.2007	PRFA01000035:273,505..275,994(+)	trans-sialidase, Group V
C4B63_134g49	16.1046	PRFA01000134:42,534..45,068(-)	trans-sialidase, Group V
C4B63_134g54	15.8516	PRFA01000134:31,543..34,077(-)	trans-sialidase, Group V
C4B63_5g356	15.43	PRFA01000005:776,490..778,823(+)	trans-sialidase, Group V
C4B63_95g6	15.0927	PRFA01000095:10,668..13,016(+)	trans-sialidase, Group V
C4B63_27g327	14.6712	PRFA01000027:47,628..50,108(-)	trans-sialidase, Group V
C4B63_32g172	14.6712	PRFA01000032:428,939..431,188(+)	trans-sialidase, Group II
C4B63_31g233	14.5025	PRFA01000031:106,345..108,942(-)	trans-sialidase, Group V
C4B63_75g91	14.3339	PRFA01000075:59,858..62,374(-)	trans-sialidase, Group II
C4B63_35g143	13.828	PRFA01000035:295,763..298,270(+)	trans-sialidase, Group V
C4B63_60g110	13.4064	PRFA01000060:172,043..174,670(-)	trans-sialidase, Group V
C4B63_5g131	13.2378	PRFA01000005:303,345..305,744(+)	trans-sialidase, Group V
C4B63_12g268	12.9005	PRFA01000012:345,535..348,372(-)	trans-sialidase, Group VI
C4B63_27g282	12.9005	PRFA01000027:136,078..138,537(-)	trans-sialidase, Group V
C4B63_1g748	12.7319	PRFA01000001:1,569,094..1,572,237(-)	trans-sialidase, Group VIII
C4B63_39g377	12.6476	PRFA01000039:1,682..4,558(-)	trans-sialidase, Group VIII
C4B63_47g128	12.6476	PRFA01000047:299,654..302,398(+)	trans-sialidase
C4B63_148g10	12.226	PRFA01000148:13,536..16,949(+)	trans-sialidase, Group VIII
C4B63_111g12	11.973	PRFA01000111:23,438..26,056(+)	trans-sialidase, Group V
C4B63_31g230	11.6358	PRFA01000031:117,214..119,808(-)	trans-sialidase, Group V
C4B63_31g250	11.5514	PRFA01000031:62,906..65,686(-)	trans-sialidase, Group V
C4B63_37g206	11.5514	PRFA01000037:388,570..391,191(+)	trans-sialidase, Group VI
C4B63_1g176	11.3828	PRFA01000001:374,385..377,222(+)	trans-sialidase
C4B63_60g89	11.3828	PRFA01000060:206,350..209,010(-)	trans-sialidase, Group V
C4B63_31g257	11.0455	PRFA01000031:45,089..47,716(-)	trans-sialidase, Group V
C4B63_1g794	10.8769	PRFA01000001:1,445,059..1,447,425(-)	trans-sialidase, Group V
C4B63_118g10	10.6239	PRFA01000118:37,211..39,394(+)	trans-sialidase, Group II
C4B63_146g45	10.5396	PRFA01000146:22,084..24,801(-)	trans-sialidase, Group VI
C4B63_35g154	10.371	PRFA01000035:317,819..320,602(+)	trans-sialidase, Group V
C4B63_91g81	10.371	PRFA01000091:39,926..42,382(-)	trans-sialidase, Group II
C4B63_109g58	10.371	PRFA01000109:65,971..68,802(-)	trans-sialidase, Group V
C4B63_3g1037	10.118	PRFA01000003:214,189..216,876(-)	trans-sialidase, Group V
C4B63_5g44	10.118	PRFA01000005:99,687..102,368(+)	trans-sialidase, Group V
C4B63_68g134	10.118	PRFA01000068:10,310..12,529(-)	trans-sialidase, Group II
C4B63_31g260	9.94941	PRFA01000031:34,220..36,823(-)	trans-sialidase, Group V
C4B63_131g50	9.52782	PRFA01000131:28,317..30,872(-)	trans-sialidase, Group I
C4B63_37g189	9.27487	PRFA01000037:369,320..372,184(+)	trans-sialidase, Group VI
C4B63_31g238	9.19056	PRFA01000031:95,678..98,278(-)	trans-sialidase, Group V
C4B63_141g33	9.19056	PRFA01000141:69,994..72,696(+)	trans-sialidase, Group I
C4B63_53g223	9.02192	PRFA01000053:67,486..70,131(-)	trans-sialidase
C4B63_180g6	8.85329	PRFA01000180:8,959..11,220(+)	trans-sialidase, Group II
C4B63_11g376	8.68465	PRFA01000011:358,411..361,422(-)	trans-sialidase, Group VI
C4B63_305g1	8.60034	PRFA01000305:3,828..6,011(+)	trans-sialidase, Group II
C4B63_37g89	8.4317	PRFA01000037:203,044..205,914(+)	trans-sialidase, Group VI
C4B63_37g106	8.4317	PRFA01000037:239,436..242,204(+)	trans-sialidase, Group VI
C4B63_31g255	8.26307	PRFA01000031:51,974..54,586(-)	trans-sialidase, Group V
C4B63_39g154	8.26307	PRFA01000039:361,021..363,426(+)	trans-sialidase, Group V
C4B63_8g285	8.17875	PRFA01000008:690,013..692,379(-)	trans-sialidase, Group V
C4B63_1g782	8.01012	PRFA01000001:1,482,436..1,484,955(-)	trans-sialidase, Group V
C4B63_5g328	8.01012	PRFA01000005:718,572..721,232(+)	trans-sialidase, Group VI
C4B63_27g306	7.67285	PRFA01000027:85,847..88,330(-)	trans-sialidase, Group V
C4B63_75g84	7.58853	PRFA01000075:74,499..77,009(-)	trans-sialidase, Group VII
C4B63_1g702	7.25126	PRFA01000001:1,599,069..1,601,807(+)	trans-sialidase, Group V
C4B63_6g579	7.16695	PRFA01000006:62,302..64,377(-)	trans-sialidase, Group I
C4B63_35g148	7.16695	PRFA01000035:306,763..309,273(+)	trans-sialidase, Group V
C4B63_46g113	7.16695	PRFA01000046:314,707..317,025(+)	trans-sialidase, Group V
C4B63_49g199	7.16695	PRFA01000049:71,490..73,673(-)	trans-sialidase, Group II
C4B63_134g39	7.16695	PRFA01000134:64,917..67,412(-)	trans-sialidase, Group V
C4B63_77g53	6.914	PRFA01000077:112,536..115,550(+)	trans-sialidase, Group III
C4B63_106g19	6.914	PRFA01000106:36,145..38,850(+)	trans-sialidase, Group V
C4B63_41g277	6.74536	PRFA01000041:61,004..63,181(-)	trans-sialidase, Group II
C4B63_17g208	6.57673	PRFA01000017:474,010..477,420(-)	trans-sialidase, Group VIII
C4B63_39g55	6.57673	PRFA01000039:144,094..146,433(+)	trans-sialidase, Group V
C4B63_71g178	6.57673	PRFA01000071:63,111..65,753(-)	trans-sialidase, Group VI
C4B63_108g29	6.15514	PRFA01000108:63,381..65,555(+)	trans-sialidase, Group II
C4B63_134g59	6.07083	PRFA01000134:20,603..23,098(-)	trans-sialidase, Group V
C4B63_67g29	5.90219	PRFA01000067:46,850..49,465(+)	trans-sialidase, Group VI
C4B63_68g111	5.81788	PRFA01000068:53,256..55,460(-)	trans-sialidase, Group II
C4B63_61g27	5.64924	PRFA01000061:105,507..107,753(+)	trans-sialidase, Group I
C4B63_29g141	5.56492	PRFA01000029:282,353..285,058(+)	trans-sialidase, Group V
C4B63_88g29	5.56492	PRFA01000088:63,137..65,938(+)	trans-sialidase, Group V
C4B63_17g205	5.39629	PRFA01000017:483,248..486,661(-)	trans-sialidase, Group VIII
C4B63_66g146	5.31197	PRFA01000066:113,285..115,564(-)	trans-sialidase, Group V
C4B63_136g6	5.31197	PRFA01000136:12,982..15,984(+)	trans-sialidase, Group I
C4B63_8g240	5.14334	PRFA01000008:672,820..675,600(+)	trans-sialidase, Group VI
C4B63_50g193	5.14334	PRFA01000050:107,484..110,093(-)	trans-sialidase, Group VI
C4B63_146g39	5.14334	PRFA01000146:39,496..42,354(-)	trans-sialidase, Group V
C4B63_16g181	5.05902	PRFA01000016:474,095..477,115(+)	trans-sialidase, Group VIII
C4B63_134g44	4.89039	PRFA01000134:53,726..56,215(-)	trans-sialidase, Group V
C4B63_29g292	4.72175	PRFA01000029:301,383..303,998(-)	trans-sialidase, Group V
C4B63_94g89	4.72175	PRFA01000094:23,028..25,244(-)	trans-sialidase, Group II
C4B63_29g223	4.55312	PRFA01000029:436,970..439,138(+)	trans-sialidase, Group II
C4B63_1g585	4.38449	PRFA01000001:1,338,439..1,341,192(+)	trans-sialidase, Group V
C4B63_37g381	4.38449	PRFA01000037:99,345..101,534(-)	trans-sialidase, Group II
C4B63_3g1069	4.30017	PRFA01000003:144,195..146,816(-)	trans-sialidase, Group V
C4B63_96g38	4.30017	PRFA01000096:82,277..84,898(+)	trans-sialidase, Group V
C4B63_66g57	4.13153	PRFA01000066:140,104..142,950(+)	trans-sialidase, Group VI
C4B63_21g168	4.04722	PRFA01000021:454,990..457,206(+)	trans-sialidase, Group II
C4B63_27g322	4.04722	PRFA01000027:57,467..60,064(-)	trans-sialidase, Group V
C4B63_43g83	4.04722	PRFA01000043:324,804..327,029(+)	trans-sialidase, Group II
C4B63_64g133	3.87858	PRFA01000064:174,092..176,785(-)	trans-sialidase, Group V
C4B63_124g14	3.87858	PRFA01000124:19,259..21,700(+)	trans-sialidase, Group V
C4B63_13g14	3.79427	PRFA01000013:36,346..38,766(+)	trans-sialidase, Group V
C4B63_88g97	3.70995	PRFA01000088:42,203..44,686(-)	trans-sialidase, Group V
C4B63_21g182	3.457	PRFA01000021:489,376..491,592(+)	trans-sialidase, Group II
C4B63_77g60	3.457	PRFA01000077:122,003..125,029(+)	trans-sialidase, Group III
C4B63_60g204	3.37268	PRFA01000060:3,003..6,158(-)	trans-sialidase
C4B63_16g197	3.20405	PRFA01000016:526,611..529,733(+)	trans-sialidase, Group VIII
C4B63_166g26	3.11973	PRFA01000166:57,228..60,299(+)	trans-sialidase, Group VIII
C4B63_132g20	3.03541	PRFA01000132:55,925..58,396(+)	trans-sialidase, Group V
C4B63_223g5	2.78246	PRFA01000223:7,799..10,426(+)	trans-sialidase, Group VI
C4B63_15g389	2.69815	PRFA01000015:312,409..314,898(-)	trans-sialidase, Group II
C4B63_29g108	2.69815	PRFA01000029:210,837..213,728(+)	trans-sialidase, Group V
C4B63_67g177	2.69815	PRFA01000067:67,772..70,612(-)	trans-sialidase, Group VI
C4B63_158g35	2.69815	PRFA01000158:46,073..48,439(-)	trans-sialidase, Group II
C4B63_240g10	2.69815	PRFA01000240:25,502..27,745(+)	trans-sialidase, Group II
C4B63_3g1132	2.61383	PRFA01000003:27,211..29,661(-)	trans-sialidase, Group I
C4B63_56g144	2.61383	PRFA01000056:49,562..51,958(-)	trans-sialidase, Group V
C4B63_71g196	2.61383	PRFA01000071:32,848..35,460(-)	trans-sialidase, Group VI
C4B63_88g102	2.61383	PRFA01000088:31,196..33,796(-)	trans-sialidase, Group V
C4B63_98g22	2.61383	PRFA01000098:51,172..52,926(+)	trans-sialidase
C4B63_33g167	2.44519	PRFA01000033:368,510..370,675(+)	trans-sialidase, Group II
C4B63_72g6	2.44519	PRFA01000072:13,146..15,506(+)	trans-sialidase, Group II
C4B63_72g19	2.44519	PRFA01000072:108,008..110,512(+)	trans-sialidase, Group II
C4B63_99g72	2.44519	PRFA01000099:83,462..84,658(-)	trans-sialidase, Group V
C4B63_26g358	2.36088	PRFA01000026:4,310..7,117(-)	trans-sialidase, Group VI
C4B63_31g263	2.27656	PRFA01000031:23,429..26,176(-)	trans-sialidase, Group V
C4B63_37g98	2.27656	PRFA01000037:217,495..220,128(+)	trans-sialidase, Group VI
C4B63_296g27	2.27656	PRFA01000296:4,538..6,862(-)	trans-sialidase, Group V
C4B63_33g38	2.19224	PRFA01000033:85,763..88,132(+)	trans-sialidase, Group V
C4B63_72g4	2.19224	PRFA01000072:7,177..9,411(+)	trans-sialidase, Group II
C4B63_11g198	2.10793	PRFA01000011:472,746..475,766(+)	trans-sialidase, Group VI
C4B63_39g111	2.02361	PRFA01000039:268,190..270,583(+)	trans-sialidase, Group V
C4B63_60g203	1.93929	PRFA01000060:8,389..10,779(-)	trans-sialidase, Group II
C4B63_99g97	1.93929	PRFA01000099:32,257..34,839(-)	trans-sialidase, Group V
C4B63_299g15	1.93929	PRFA01000299:19,555..22,236(-)	trans-sialidase, Group V
C4B63_27g332	1.85497	PRFA01000027:36,671..39,268(-)	trans-sialidase, Group V
C4B63_27g292	1.85497	PRFA01000027:115,024..117,609(-)	trans-sialidase, Group V
C4B63_130g39	1.85497	PRFA01000130:29,592..32,090(-)	trans-sialidase, Group II
C4B63_5g374	1.77066	PRFA01000005:810,877..813,537(+)	trans-sialidase
C4B63_13g367	1.77066	PRFA01000013:77,359..80,046(-)	trans-sialidase, Group V
C4B63_27g337	1.77066	PRFA01000027:27,838..30,174(-)	trans-sialidase, Group V
C4B63_15g419	1.68634	PRFA01000015:253,587..256,349(-)	trans-sialidase, Group V
C4B63_116g59	1.68634	PRFA01000116:62,097..64,934(-)	trans-sialidase, Group VI
C4B63_5g426	1.60202	PRFA01000005:889,913..892,417(-)	trans-sialidase, Group II
C4B63_39g66	1.60202	PRFA01000039:165,864..168,182(+)	trans-sialidase, Group V
C4B63_75g82	1.60202	PRFA01000075:79,061..81,775(-)	trans-sialidase, Group IV
C4B63_191g3	1.60202	PRFA01000191:15,588..18,446(+)	trans-sialidase, Group VI
C4B63_1g666	1.51771	PRFA01000001:1,528,593..1,531,019(+)	trans-sialidase, Group V
C4B63_88g112	1.51771	PRFA01000088:11,255..13,573(-)	trans-sialidase, Group V
C4B63_3g760	1.43339	PRFA01000003:779,145..781,583(-)	trans-sialidase, Group V
C4B63_15g83	1.43339	PRFA01000015:155,134..157,929(+)	trans-sialidase, Group V
C4B63_126g15	1.43339	PRFA01000126:34,352..37,081(+)	trans-sialidase, Group V
C4B63_136g3	1.43339	PRFA01000136:2,972..5,830(+)	trans-sialidase, Group V
C4B63_155g10	1.43339	PRFA01000155:22,472..24,649(+)	trans-sialidase
C4B63_13g176	1.34907	PRFA01000013:564,130..566,337(+)	trans-sialidase, Group VIII
C4B63_29g134	1.34907	PRFA01000029:265,459..268,287(+)	trans-sialidase, Group VI
C4B63_41g263	1.34907	PRFA01000041:95,679..98,399(-)	trans-sialidase, Group IV
C4B63_8g82	1.26476	PRFA01000008:331,806..334,568(+)	trans-sialidase, Group V
C4B63_25g331	1.26476	PRFA01000025:7,231..9,360(-)	trans-sialidase, Group I
C4B63_26g55	1.26476	PRFA01000026:101,992..104,616(+)	trans-sialidase, Group V
C4B63_43g92	1.26476	PRFA01000043:345,624..348,758(+)	trans-sialidase, Group VIII
C4B63_50g188	1.26476	PRFA01000050:120,750..123,167(-)	trans-sialidase, Group V
C4B63_58g227	1.26476	PRFA01000058:28,956..32,099(-)	trans-sialidase, Group VIII
C4B63_60g82	1.26476	PRFA01000060:217,271..219,787(-)	trans-sialidase, Group V
C4B63_117g67	1.26476	PRFA01000117:23,547..26,312(-)	trans-sialidase, Group VIII
C4B63_121g88	1.26476	PRFA01000121:15,470..18,058(-)	trans-sialidase, Group V
C4B63_5g121	1.18044	PRFA01000005:280,559..283,225(+)	trans-sialidase, Group V
C4B63_15g269	1.18044	PRFA01000015:541,746..544,508(+)	trans-sialidase, Group V
C4B63_35g334	1.18044	PRFA01000035:131,305..134,436(-)	trans-sialidase, Group VIII
C4B63_54g93	1.18044	PRFA01000054:222,852..225,488(+)	trans-sialidase, Group V
C4B63_223g15	1.18044	PRFA01000223:19,069..21,462(+)	trans-sialidase, Group V
C4B63_1g806	1.09612	PRFA01000001:1,424,024..1,426,450(-)	trans-sialidase, Group V
C4B63_3g567	1.09612	PRFA01000003:1,195,129..1,197,474(-)	trans-sialidase, Group V
C4B63_5g349	1.09612	PRFA01000005:759,408..762,176(+)	trans-sialidase
C4B63_11g425	1.09612	PRFA01000011:251,963..254,827(-)	trans-sialidase, Group VI
C4B63_11g338	1.09612	PRFA01000011:435,810..438,578(-)	trans-sialidase, Group V
C4B63_36g364	1.09612	PRFA01000036:27,036..29,462(-)	trans-sialidase, Group V
C4B63_46g181	1.09612	PRFA01000046:23,225..26,356(-)	trans-sialidase, Group VIII
C4B63_75g77	1.09612	PRFA01000075:89,671..92,166(-)	trans-sialidase, Group II
C4B63_197g26	1.09612	PRFA01000197:23,058..25,829(-)	trans-sialidase, Group V
C4B63_1g780	1.0118	PRFA01000001:1,497,214..1,499,622(-)	trans-sialidase, Group V
C4B63_3g300	1.0118	PRFA01000003:678,889..681,321(+)	trans-sialidase, Group V
C4B63_3g467	1.0118	PRFA01000003:1,049,114..1,051,942(+)	trans-sialidase, Group VI
C4B63_3g621	1.0118	PRFA01000003:1,068,211..1,070,631(-)	trans-sialidase, Group V
C4B63_21g180	1.0118	PRFA01000021:483,980..487,126(+)	trans-sialidase, Group VIII
C4B63_154g15	1.0118	PRFA01000154:36,403..38,817(+)	trans-sialidase, Group I
C4B63_1g953	0.927487	PRFA01000001:1,059,998..1,062,358(-)	trans-sialidase, Group V
C4B63_5g125	0.927487	PRFA01000005:288,704..291,121(+)	trans-sialidase, Group V
C4B63_25g269	0.927487	PRFA01000025:147,303..149,504(-)	trans-sialidase, Group II
C4B63_74g55	0.927487	PRFA01000074:109,921..112,644(+)	trans-sialidase, Group V
C4B63_209g8	0.927487	PRFA01000209:22,653..24,860(+)	trans-sialidase, Group II
C4B63_1g164	0.84317	PRFA01000001:344,645..347,239(+)	trans-sialidase, Group V
C4B63_3g957	0.84317	PRFA01000003:369,104..371,902(-)	trans-sialidase, Group VI
C4B63_3g943	0.84317	PRFA01000003:399,286..401,730(-)	trans-sialidase, Group V
C4B63_3g815	0.84317	PRFA01000003:657,099..659,867(-)	trans-sialidase, Group V
C4B63_3g646	0.84317	PRFA01000003:1,000,130..1,002,976(-)	trans-sialidase, Group V
C4B63_5g298	0.84317	PRFA01000005:660,351..663,050(+)	trans-sialidase, Group V
C4B63_11g401	0.84317	PRFA01000011:309,664..312,369(-)	trans-sialidase, Group V
C4B63_23g10	0.84317	PRFA01000023:24,644..27,766(+)	trans-sialidase, Group VIII
C4B63_28g340	0.84317	PRFA01000028:21,847..25,014(-)	trans-sialidase, Group VIII
C4B63_33g278	0.84317	PRFA01000033:230,495..233,389(-)	trans-sialidase, Group VI
C4B63_39g175	0.84317	PRFA01000039:400,674..403,397(-)	trans-sialidase, Group V
C4B63_47g125	0.84317	PRFA01000047:287,975..290,725(+)	trans-sialidase
C4B63_53g228	0.84317	PRFA01000053:58,002..60,710(-)	trans-sialidase, Group V
C4B63_62g98	0.84317	PRFA01000062:186,458..189,598(+)	trans-sialidase, Group VIII
C4B63_78g60	0.84317	PRFA01000078:135,231..138,008(+)	trans-sialidase, Group V
C4B63_136g25	0.84317	PRFA01000136:49,782..52,400(+)	trans-sialidase, Group V
C4B63_167g33	0.84317	PRFA01000167:38,564..41,086(-)	trans-sialidase, Group II
C4B63_408g15	0.84317	PRFA01000408:8,827..11,952(-)	trans-sialidase, Group VIII
C4B63_3g791	0.758853	PRFA01000003:713,840..716,278(-)	trans-sialidase, Group V
C4B63_15g332	0.758853	PRFA01000015:445,563..448,286(-)	trans-sialidase, Group V
C4B63_22g131	0.758853	PRFA01000022:356,510..359,647(+)	trans-sialidase, Group VIII
C4B63_36g147	0.758853	PRFA01000036:317,078..319,876(+)	trans-sialidase, Group V
C4B63_37g122	0.758853	PRFA01000037:267,103..269,520(+)	trans-sialidase, Group V
C4B63_39g147	0.758853	PRFA01000039:346,738..349,041(+)	trans-sialidase, Group V
C4B63_134g38	0.758853	PRFA01000134:68,740..71,205(-)	trans-sialidase, Group V
C4B63_1g436	0.674536	PRFA01000001:1,020,171..1,022,861(+)	trans-sialidase
C4B63_1g819	0.674536	PRFA01000001:1,400,040..1,402,877(-)	trans-sialidase, Group VI
C4B63_3g575	0.674536	PRFA01000003:1,176,684..1,179,530(-)	trans-sialidase, Group VI
C4B63_8g313	0.674536	PRFA01000008:640,743..643,469(-)	trans-sialidase
C4B63_15g308	0.674536	PRFA01000015:496,654..499,080(-)	trans-sialidase, Group V
C4B63_24g250	0.674536	PRFA01000024:258,226..260,565(-)	trans-sialidase, Group V
C4B63_38g189	0.674536	PRFA01000038:393,107..395,422(+)	trans-sialidase, Group II
C4B63_43g95	0.674536	PRFA01000043:351,035..353,503(+)	trans-sialidase, Group II
C4B63_50g133	0.674536	PRFA01000050:247,425..249,839(-)	trans-sialidase, Group V
C4B63_169g40	0.674536	PRFA01000169:20,273..23,149(-)	trans-sialidase, Group VI
C4B63_417g17	0.674536	PRFA01000417:10,113..12,431(-)	trans-sialidase, Group V
C4B63_1g1255	0.590219	PRFA01000001:417,964..420,345(-)	trans-sialidase, Group V
C4B63_1g1100	0.590219	PRFA01000001:755,676..759,026(-)	trans-sialidase, Group VIII
C4B63_5g752	0.590219	PRFA01000005:118,763..121,180(-)	trans-sialidase, Group V
C4B63_5g156	0.590219	PRFA01000005:350,247..352,892(+)	trans-sialidase, Group V
C4B63_5g227	0.590219	PRFA01000005:524,130..526,802(+)	trans-sialidase, Group V
C4B63_21g165	0.590219	PRFA01000021:449,596..452,745(+)	trans-sialidase, Group VIII
C4B63_27g302	0.590219	PRFA01000027:96,382..98,700(-)	trans-sialidase, Group V
C4B63_29g85	0.590219	PRFA01000029:156,081..158,852(+)	trans-sialidase, Group V
C4B63_33g56	0.590219	PRFA01000033:132,818..135,724(+)	trans-sialidase, Group VI
C4B63_33g194	0.590219	PRFA01000033:419,910..423,053(+)	trans-sialidase
C4B63_51g213	0.590219	PRFA01000051:72,522..74,618(-)	trans-sialidase, Group V
C4B63_64g186	0.590219	PRFA01000064:48,361..50,751(-)	trans-sialidase, Group V
C4B63_67g71	0.590219	PRFA01000067:128,893..131,679(+)	trans-sialidase, Group VI
C4B63_91g93	0.590219	PRFA01000091:10,336..13,449(-)	trans-sialidase, Group VIII
C4B63_150g12	0.590219	PRFA01000150:43,990..46,857(+)	trans-sialidase, Group V
C4B63_159g15	0.590219	PRFA01000159:43,145..46,288(+)	trans-sialidase, Group VIII
C4B63_197g31	0.590219	PRFA01000197:14,138..16,909(-)	trans-sialidase, Group V
C4B63_259g18	0.590219	PRFA01000259:15,148..17,595(-)	trans-sialidase, Group II
C4B63_311g10	0.590219	PRFA01000311:9,680..12,058(+)	trans-sialidase, Group V
C4B63_1g623	0.505902	PRFA01000001:1,429,413..1,431,923(+)	trans-sialidase, Group V
C4B63_3g1046	0.505902	PRFA01000003:202,145..204,976(-)	trans-sialidase, Group VI
C4B63_3g911	0.505902	PRFA01000003:459,296..462,148(-)	trans-sialidase, Group V
C4B63_5g551	0.505902	PRFA01000005:620,860..623,235(-)	trans-sialidase, Group II
C4B63_5g75	0.505902	PRFA01000005:175,807..178,440(+)	trans-sialidase, Group V
C4B63_5g241	0.505902	PRFA01000005:544,855..547,620(+)	trans-sialidase, Group V
C4B63_11g373	0.505902	PRFA01000011:366,611..369,316(-)	trans-sialidase, Group V
C4B63_14g126	0.505902	PRFA01000014:284,930..287,284(+)	trans-sialidase, Group I
C4B63_15g253	0.505902	PRFA01000015:511,580..514,381(+)	trans-sialidase, Group V
C4B63_38g303	0.505902	PRFA01000038:50,741..53,128(-)	trans-sialidase, Group II
C4B63_39g144	0.505902	PRFA01000039:340,139..342,631(+)	trans-sialidase, Group V
C4B63_47g160	0.505902	PRFA01000047:14,170..17,295(-)	trans-sialidase, Group VIII
C4B63_50g158	0.505902	PRFA01000050:186,960..189,743(-)	trans-sialidase, Group VI
C4B63_53g178	0.505902	PRFA01000053:157,620..160,289(-)	trans-sialidase, Group V
C4B63_54g100	0.505902	PRFA01000054:239,440..242,037(+)	trans-sialidase, Group V
C4B63_62g3	0.505902	PRFA01000062:2,734..5,142(+)	trans-sialidase, Group V
C4B63_90g81	0.505902	PRFA01000090:76,306..79,011(-)	trans-sialidase, Group V
C4B63_98g38	0.505902	PRFA01000098:104,681..107,059(+)	trans-sialidase, Group II
C4B63_103g65	0.505902	PRFA01000103:48,989..51,736(-)	trans-sialidase, Group VI
C4B63_144g19	0.505902	PRFA01000144:40,803..43,355(+)	trans-sialidase
C4B63_169g33	0.505902	PRFA01000169:41,534..44,350(-)	trans-sialidase, Group VI
C4B63_1g1161	0.421585	PRFA01000001:613,678..616,170(-)	trans-sialidase, Group II
C4B63_1g1079	0.421585	PRFA01000001:800,976..803,354(-)	trans-sialidase, Group V
C4B63_3g105	0.421585	PRFA01000003:252,648..255,422(+)	trans-sialidase, Group V
C4B63_3g112	0.421585	PRFA01000003:267,639..270,449(+)	trans-sialidase, Group VI
C4B63_3g1003	0.421585	PRFA01000003:278,419..281,196(-)	trans-sialidase, Group V
C4B63_3g951	0.421585	PRFA01000003:382,103..384,862(-)	trans-sialidase, Group VI
C4B63_3g211	0.421585	PRFA01000003:480,378..483,236(+)	trans-sialidase, Group VI
C4B63_3g776	0.421585	PRFA01000003:744,634..747,477(-)	trans-sialidase, Group VI
C4B63_3g580	0.421585	PRFA01000003:1,153,054..1,155,921(-)	trans-sialidase, Group VI
C4B63_5g643	0.421585	PRFA01000005:382,226..384,967(-)	trans-sialidase, Group V
C4B63_5g222	0.421585	PRFA01000005:513,812..516,502(+)	trans-sialidase, Group V
C4B63_8g93	0.421585	PRFA01000008:349,537..352,257(+)	trans-sialidase, Group V
C4B63_9g109	0.421585	PRFA01000009:383,649..386,207(+)	trans-sialidase, Group V
C4B63_14g120	0.421585	PRFA01000014:268,964..271,351(+)	trans-sialidase, Group V
C4B63_15g34	0.421585	PRFA01000015:65,751..68,099(+)	trans-sialidase, Group V
C4B63_15g460	0.421585	PRFA01000015:175,165..177,900(-)	trans-sialidase, Group V
C4B63_15g125	0.421585	PRFA01000015:218,125..220,956(+)	trans-sialidase, Group VI
C4B63_15g224	0.421585	PRFA01000015:429,885..432,701(+)	trans-sialidase, Group VI
C4B63_26g53	0.421585	PRFA01000026:96,943..99,786(+)	trans-sialidase, Group VI
C4B63_36g184	0.421585	PRFA01000036:381,208..383,640(+)	trans-sialidase, Group V
C4B63_36g21	0.421585	PRFA01000036:41,068..43,494(+)	trans-sialidase, Group V
C4B63_49g193	0.421585	PRFA01000049:80,674..83,031(-)	trans-sialidase, Group II
C4B63_50g170	0.421585	PRFA01000050:166,013..168,424(-)	trans-sialidase, Group V
C4B63_53g214	0.421585	PRFA01000053:88,917..92,054(-)	trans-sialidase, Group VIII
C4B63_53g72	0.421585	PRFA01000053:137,140..139,818(+)	trans-sialidase
C4B63_60g90	0.421585	PRFA01000060:202,644..205,256(-)	trans-sialidase, Group V
C4B63_62g172	0.421585	PRFA01000062:87,106..89,847(-)	trans-sialidase, Group VI
C4B63_68g74	0.421585	PRFA01000068:177,160..180,297(-)	trans-sialidase, Group VIII
C4B63_74g138	0.421585	PRFA01000074:37,843..40,497(-)	trans-sialidase, Group V
C4B63_75g72	0.421585	PRFA01000075:100,520..103,231(-)	trans-sialidase, Group IV
C4B63_88g108	0.421585	PRFA01000088:21,140..23,926(-)	trans-sialidase, Group V
C4B63_99g71	0.421585	PRFA01000099:84,510..86,063(-)	trans-sialidase, Group V
C4B63_105g48	0.421585	PRFA01000105:86,128..88,809(-)	trans-sialidase, Group IV
C4B63_115g33	0.421585	PRFA01000115:76,015..78,369(+)	trans-sialidase, Group V
C4B63_121g1	0.421585	PRFA01000121:5,338..7,926(+)	trans-sialidase, Group V
C4B63_125g62	0.421585	PRFA01000125:45,996..48,830(-)	trans-sialidase, Group V
C4B63_147g50	0.421585	PRFA01000147:36,449..38,938(-)	trans-sialidase, Group V
C4B63_155g14	0.421585	PRFA01000155:45,509..47,569(+)	trans-sialidase, Group II
C4B63_325g12	0.421585	PRFA01000325:16,459..19,197(-)	trans-sialidase, Group V
C4B63_1g86	0.337268	PRFA01000001:184,965..187,430(+)	trans-sialidase, Group V
C4B63_5g588	0.337268	PRFA01000005:534,577..537,213(-)	trans-sialidase
C4B63_5g538	0.337268	PRFA01000005:645,772..648,177(-)	trans-sialidase, Group V
C4B63_5g319	0.337268	PRFA01000005:702,807..705,299(+)	trans-sialidase, Group VI
C4B63_5g368	0.337268	PRFA01000005:797,225..799,906(+)	trans-sialidase, Group V
C4B63_15g504	0.337268	PRFA01000015:95,946..98,780(-)	trans-sialidase, Group V
C4B63_15g107	0.337268	PRFA01000015:196,887..199,667(+)	trans-sialidase, Group VI
C4B63_15g133	0.337268	PRFA01000015:235,571..238,006(+)	trans-sialidase, Group V
C4B63_15g353	0.337268	PRFA01000015:404,106..406,940(-)	trans-sialidase, Group VI
C4B63_24g287	0.337268	PRFA01000024:177,254..179,605(-)	trans-sialidase, Group V
C4B63_36g130	0.337268	PRFA01000036:281,647..284,436(+)	trans-sialidase, Group VI
C4B63_38g310	0.337268	PRFA01000038:19,484..22,597(-)	trans-sialidase, Group VIII
C4B63_62g159	0.337268	PRFA01000062:104,566..107,274(-)	trans-sialidase, Group V
C4B63_63g143	0.337268	PRFA01000063:11,858..14,545(-)	trans-sialidase, Group IV
C4B63_68g131	0.337268	PRFA01000068:14,729..17,206(-)	trans-sialidase, Group II
C4B63_68g91	0.337268	PRFA01000068:125,009..128,143(-)	trans-sialidase, Group VIII
C4B63_82g111	0.337268	PRFA01000082:18,424..21,192(-)	trans-sialidase, Group IV
C4B63_99g80	0.337268	PRFA01000099:68,660..71,479(-)	trans-sialidase, Group VI
C4B63_107g93	0.337268	PRFA01000107:29,245..32,070(-)	trans-sialidase, Group VI
C4B63_107g30	0.337268	PRFA01000107:41,856..45,278(+)	trans-sialidase, Group VIII
C4B63_125g58	0.337268	PRFA01000125:54,737..57,685(-)	trans-sialidase, Group V
C4B63_132g12	0.337268	PRFA01000132:35,008..37,494(+)	trans-sialidase, Group V
C4B63_138g13	0.337268	PRFA01000138:19,736..22,111(+)	trans-sialidase, Group V
C4B63_159g21	0.337268	PRFA01000159:60,691..63,129(+)	trans-sialidase, Group VIII
C4B63_209g4	0.337268	PRFA01000209:7,396..9,720(+)	trans-sialidase, Group II
C4B63_240g3	0.337268	PRFA01000240:7,695..9,899(+)	trans-sialidase, Group II
C4B63_309g17	0.337268	PRFA01000309:3,884..5,890(-)	trans-sialidase, Group I
C4B63_310g9	0.337268	PRFA01000310:18,676..21,033(+)	trans-sialidase, Group I
C4B63_1g1397	0.252951	PRFA01000001:23,286..25,469(-)	trans-sialidase, Group II
C4B63_1g1234	0.252951	PRFA01000001:461,729..464,377(-)	trans-sialidase
C4B63_1g1091	0.252951	PRFA01000001:776,214..778,874(-)	trans-sialidase
C4B63_1g352	0.252951	PRFA01000001:841,895..844,546(+)	trans-sialidase
C4B63_1g388	0.252951	PRFA01000001:926,841..929,405(+)	trans-sialidase, Group V
C4B63_3g1059	0.252951	PRFA01000003:163,304..166,105(-)	trans-sialidase, Group V
C4B63_3g996	0.252951	PRFA01000003:294,076..296,898(-)	trans-sialidase, Group VI
C4B63_3g981	0.252951	PRFA01000003:322,088..324,541(-)	trans-sialidase, Group V
C4B63_3g865	0.252951	PRFA01000003:552,200..554,899(-)	trans-sialidase, Group V
C4B63_3g843	0.252951	PRFA01000003:596,302..599,070(-)	trans-sialidase, Group V
C4B63_3g756	0.252951	PRFA01000003:790,315..793,074(-)	trans-sialidase, Group V
C4B63_3g582	0.252951	PRFA01000003:1,144,867..1,147,563(-)	trans-sialidase, Group V
C4B63_5g102	0.252951	PRFA01000005:219,635..222,274(+)	trans-sialidase, Group V
C4B63_5g248	0.252951	PRFA01000005:561,173..563,518(+)	trans-sialidase, Group V
C4B63_5g385	0.252951	PRFA01000005:845,886..848,555(+)	trans-sialidase, Group V
C4B63_8g168	0.252951	PRFA01000008:500,768..503,344(+)	trans-sialidase, Group V
C4B63_11g419	0.252951	PRFA01000011:262,245..264,827(-)	trans-sialidase, Group V
C4B63_11g151	0.252951	PRFA01000011:339,431..342,262(+)	trans-sialidase, Group VI
C4B63_15g77	0.252951	PRFA01000015:143,536..146,259(+)	trans-sialidase, Group V
C4B63_15g411	0.252951	PRFA01000015:270,887..273,598(-)	trans-sialidase, Group V
C4B63_15g219	0.252951	PRFA01000015:418,340..420,931(+)	trans-sialidase, Group V
C4B63_27g262	0.252951	PRFA01000027:187,857..190,463(-)	trans-sialidase, Group V
C4B63_29g60	0.252951	PRFA01000029:118,317..121,013(+)	trans-sialidase, Group V
C4B63_29g325	0.252951	PRFA01000029:255,152..257,977(-)	trans-sialidase, Group V
C4B63_33g293	0.252951	PRFA01000033:209,015..211,597(-)	trans-sialidase, Group V
C4B63_36g60	0.252951	PRFA01000036:117,965..120,751(+)	trans-sialidase, Group V
C4B63_36g108	0.252951	PRFA01000036:226,462..229,284(+)	trans-sialidase, Group VI
C4B63_37g143	0.252951	PRFA01000037:292,745..295,495(+)	trans-sialidase, Group VI
C4B63_50g148	0.252951	PRFA01000050:208,684..211,560(-)	trans-sialidase, Group V
C4B63_57g39	0.252951	PRFA01000057:188,021..190,708(+)	trans-sialidase, Group V
C4B63_58g229	0.252951	PRFA01000058:18,952..21,339(-)	trans-sialidase, Group II
C4B63_65g103	0.252951	PRFA01000065:160,338..163,001(+)	trans-sialidase, Group VI
C4B63_67g58	0.252951	PRFA01000067:106,515..108,926(+)	trans-sialidase, Group V
C4B63_68g121	0.252951	PRFA01000068:32,935..35,403(-)	trans-sialidase, Group II
C4B63_69g42	0.252951	PRFA01000069:85,977..88,484(+)	trans-sialidase, Group V
C4B63_71g6	0.252951	PRFA01000071:16,957..19,779(+)	trans-sialidase, Group VI
C4B63_94g87	0.252951	PRFA01000094:27,387..30,533(-)	trans-sialidase, Group VIII
C4B63_98g20	0.252951	PRFA01000098:45,238..48,405(+)	trans-sialidase, Group IV
C4B63_115g23	0.252951	PRFA01000115:58,299..60,941(+)	trans-sialidase, Group V
C4B63_117g59	0.252951	PRFA01000117:48,849..51,236(-)	trans-sialidase, Group II
C4B63_121g77	0.252951	PRFA01000121:35,888..38,401(-)	trans-sialidase, Group V
C4B63_125g16	0.252951	PRFA01000125:32,837..35,692(+)	trans-sialidase, Group VI
C4B63_126g4	0.252951	PRFA01000126:5,677..8,040(+)	trans-sialidase, Group V
C4B63_131g40	0.252951	PRFA01000131:73,203..75,728(-)	trans-sialidase, Group II
C4B63_136g12	0.252951	PRFA01000136:27,750..30,608(+)	trans-sialidase, Group V
C4B63_138g18	0.252951	PRFA01000138:32,424..34,775(+)	trans-sialidase, Group V
C4B63_152g35	0.252951	PRFA01000152:25,645..27,801(-)	trans-sialidase, Group II
C4B63_157g44	0.252951	PRFA01000157:14,871..17,513(-)	trans-sialidase, Group IV
C4B63_157g36	0.252951	PRFA01000157:34,395..36,569(-)	trans-sialidase, Group II
C4B63_159g4	0.252951	PRFA01000159:11,558..14,065(+)	trans-sialidase, Group II
C4B63_169g36	0.252951	PRFA01000169:32,421..35,144(-)	trans-sialidase, Group V
C4B63_231g14	0.252951	PRFA01000231:22,499..25,630(+)	trans-sialidase, Group VIII
C4B63_1g1308	0.168634	PRFA01000001:309,008..311,614(-)	trans-sialidase
C4B63_1g240	0.168634	PRFA01000001:519,590..522,124(+)	trans-sialidase, Group V
C4B63_1g383	0.168634	PRFA01000001:916,531..919,029(+)	trans-sialidase, Group V
C4B63_1g998	0.168634	PRFA01000001:978,056..979,687(-)	trans-sialidase, Group V
C4B63_1g935	0.168634	PRFA01000001:1,088,876..1,091,557(-)	trans-sialidase, Group V
C4B63_1g596	0.168634	PRFA01000001:1,367,788..1,370,457(+)	trans-sialidase
C4B63_1g729	0.168634	PRFA01000001:1,610,714..1,613,038(-)	trans-sialidase, Group V
C4B63_3g205	0.168634	PRFA01000003:469,771..472,542(+)	trans-sialidase, Group VI
C4B63_3g618	0.168634	PRFA01000003:1,078,365..1,081,166(-)	trans-sialidase, Group V
C4B63_3g613	0.168634	PRFA01000003:1,088,776..1,091,586(-)	trans-sialidase, Group V
C4B63_3g501	0.168634	PRFA01000003:1,111,499..1,114,318(+)	trans-sialidase, Group VI
C4B63_5g778	0.168634	PRFA01000005:31,798..34,140(-)	trans-sialidase, Group V
C4B63_5g693	0.168634	PRFA01000005:242,164..244,839(-)	trans-sialidase, Group V
C4B63_5g544	0.168634	PRFA01000005:633,086..635,809(-)	trans-sialidase
C4B63_5g307	0.168634	PRFA01000005:678,652..681,366(+)	trans-sialidase, Group V
C4B63_8g97	0.168634	PRFA01000008:358,557..361,184(+)	trans-sialidase, Group VI
C4B63_11g122	0.168634	PRFA01000011:279,605..282,316(+)	trans-sialidase, Group VI
C4B63_11g147	0.168634	PRFA01000011:328,452..331,562(+)	trans-sialidase, Group VIII
C4B63_15g494	0.168634	PRFA01000015:121,875..124,634(-)	trans-sialidase, Group VI
C4B63_15g314	0.168634	PRFA01000015:484,960..487,665(-)	trans-sialidase, Group V
C4B63_24g328	0.168634	PRFA01000024:99,777..102,011(-)	trans-sialidase, Group II
C4B63_26g29	0.168634	PRFA01000026:59,896..63,087(+)	trans-sialidase, Group I
C4B63_27g274	0.168634	PRFA01000027:156,366..158,951(-)	trans-sialidase, Group V
C4B63_27g269	0.168634	PRFA01000027:167,251..169,989(-)	trans-sialidase, Group V
C4B63_29g38	0.168634	PRFA01000029:72,571..75,360(+)	trans-sialidase, Group VI
C4B63_33g274	0.168634	PRFA01000033:246,366..249,164(-)	trans-sialidase, Group VI
C4B63_36g369	0.168634	PRFA01000036:14,565..17,399(-)	trans-sialidase, Group VI
C4B63_36g57	0.168634	PRFA01000036:108,707..111,454(+)	trans-sialidase, Group VI
C4B63_36g101	0.168634	PRFA01000036:200,890..203,553(+)	trans-sialidase, Group VI
C4B63_36g195	0.168634	PRFA01000036:399,262..402,051(+)	trans-sialidase, Group V
C4B63_39g128	0.168634	PRFA01000039:310,125..312,812(+)	trans-sialidase, Group V
C4B63_50g208	0.168634	PRFA01000050:75,968..78,724(-)	trans-sialidase, Group VI
C4B63_50g142	0.168634	PRFA01000050:224,822..227,233(-)	trans-sialidase, Group V
C4B63_53g59	0.168634	PRFA01000053:112,117..114,762(+)	trans-sialidase
C4B63_53g171	0.168634	PRFA01000053:180,099..182,711(-)	trans-sialidase, Group V
C4B63_64g118	0.168634	PRFA01000064:212,311..214,998(-)	trans-sialidase, Group V
C4B63_65g113	0.168634	PRFA01000065:172,113..174,512(+)	trans-sialidase, Group V
C4B63_67g85	0.168634	PRFA01000067:153,686..156,049(+)	trans-sialidase, Group II
C4B63_68g107	0.168634	PRFA01000068:70,118..72,646(-)	trans-sialidase, Group II
C4B63_71g133	0.168634	PRFA01000071:126,699..129,329(-)	trans-sialidase, Group VI
C4B63_74g14	0.168634	PRFA01000074:25,644..28,364(+)	trans-sialidase, Group V
C4B63_74g124	0.168634	PRFA01000074:69,363..72,014(-)	trans-sialidase
C4B63_94g80	0.168634	PRFA01000094:56,651..59,800(-)	trans-sialidase, Group VIII
C4B63_103g75	0.168634	PRFA01000103:24,336..27,056(-)	trans-sialidase, Group VI
C4B63_115g14	0.168634	PRFA01000115:27,481..30,345(+)	trans-sialidase, Group V
C4B63_125g45	0.168634	PRFA01000125:73,196..75,904(-)	trans-sialidase, Group V
C4B63_145g8	0.168634	PRFA01000145:10,715..13,483(+)	trans-sialidase, Group IV
C4B63_153g14	0.168634	PRFA01000153:44,717..47,857(+)	trans-sialidase, Group VIII
C4B63_196g41	0.168634	PRFA01000196:22,503..24,860(-)	trans-sialidase, Group V
C4B63_226g20	0.168634	PRFA01000226:18,692..21,841(-)	trans-sialidase, Group VIII
C4B63_319g8	0.168634	PRFA01000319:16,126..18,264(+)	trans-sialidase, Group II
C4B63_1g94	0.084317	PRFA01000001:201,704..204,193(+)	trans-sialidase, Group II
C4B63_1g106	0.084317	PRFA01000001:231,804..234,290(+)	trans-sialidase, Group II
C4B63_1g1312	0.084317	PRFA01000001:298,097..300,733(-)	trans-sialidase
C4B63_1g1263	0.084317	PRFA01000001:399,835..402,318(-)	trans-sialidase, Group V
C4B63_1g226	0.084317	PRFA01000001:491,561..494,215(+)	trans-sialidase, Group V
C4B63_1g282	0.084317	PRFA01000001:658,799..661,288(+)	trans-sialidase, Group V
C4B63_1g1097	0.084317	PRFA01000001:764,602..767,766(-)	trans-sialidase, Group VIII
C4B63_1g965	0.084317	PRFA01000001:1,031,046..1,033,706(-)	trans-sialidase
C4B63_1g931	0.084317	PRFA01000001:1,097,723..1,100,407(-)	trans-sialidase, Group V
C4B63_1g508	0.084317	PRFA01000001:1,193,105..1,195,450(+)	trans-sialidase, Group V
C4B63_1g546	0.084317	PRFA01000001:1,268,981..1,271,719(+)	trans-sialidase, Group V
C4B63_1g564	0.084317	PRFA01000001:1,298,212..1,301,373(+)	trans-sialidase, Group VIII
C4B63_1g791	0.084317	PRFA01000001:1,458,769..1,461,327(-)	trans-sialidase
C4B63_3g1077	0.084317	PRFA01000003:128,207..130,702(-)	trans-sialidase, Group V
C4B63_3g916	0.084317	PRFA01000003:448,460..451,192(-)	trans-sialidase, Group V
C4B63_3g897	0.084317	PRFA01000003:491,854..494,664(-)	trans-sialidase, Group VI
C4B63_3g799	0.084317	PRFA01000003:697,715..700,489(-)	trans-sialidase, Group V
C4B63_3g767	0.084317	PRFA01000003:765,223..768,033(-)	trans-sialidase, Group V
C4B63_3g357	0.084317	PRFA01000003:805,024..807,723(+)	trans-sialidase, Group V
C4B63_3g392	0.084317	PRFA01000003:877,940..880,777(+)	trans-sialidase, Group VI
C4B63_3g400	0.084317	PRFA01000003:896,031..898,712(+)	trans-sialidase, Group VI
C4B63_3g449	0.084317	PRFA01000003:1,015,346..1,018,144(+)	trans-sialidase, Group V
C4B63_3g495	0.084317	PRFA01000003:1,098,875..1,101,589(+)	trans-sialidase, Group VI
C4B63_3g561	0.084317	PRFA01000003:1,205,452..1,208,154(-)	trans-sialidase
C4B63_5g782	0.084317	PRFA01000005:21,136..23,484(-)	trans-sialidase, Group V
C4B63_5g26	0.084317	PRFA01000005:65,051..67,402(+)	trans-sialidase, Group V
C4B63_5g117	0.084317	PRFA01000005:269,107..272,274(+)	trans-sialidase, Group VIII
C4B63_5g152	0.084317	PRFA01000005:341,940..344,591(+)	trans-sialidase, Group V
C4B63_8g143	0.084317	PRFA01000008:448,196..450,850(+)	trans-sialidase, Group V
C4B63_8g186	0.084317	PRFA01000008:547,399..550,056(+)	trans-sialidase
C4B63_8g254	0.084317	PRFA01000008:726,875..729,700(+)	trans-sialidase, Group VI
C4B63_9g97	0.084317	PRFA01000009:364,216..366,936(+)	trans-sialidase, Group V
C4B63_11g252	0.084317	PRFA01000011:569,989..572,829(+)	trans-sialidase, Group VI
C4B63_15g137	0.084317	PRFA01000015:242,876..245,635(+)	trans-sialidase, Group V
C4B63_15g397	0.084317	PRFA01000015:297,319..300,126(-)	trans-sialidase, Group V
C4B63_15g370	0.084317	PRFA01000015:363,236..365,935(-)	trans-sialidase, Group VI
C4B63_15g360	0.084317	PRFA01000015:380,347..383,175(-)	trans-sialidase, Group VI
C4B63_16g33	0.084317	PRFA01000016:65,468..67,915(+)	trans-sialidase, Group VIII
C4B63_16g142	0.084317	PRFA01000016:405,252..407,780(+)	trans-sialidase, Group II
C4B63_29g449	0.084317	PRFA01000029:21,292..24,078(-)	trans-sialidase, Group VI
C4B63_29g15	0.084317	PRFA01000029:36,775..39,528(+)	trans-sialidase, Group V
C4B63_29g89	0.084317	PRFA01000029:167,122..169,728(+)	trans-sialidase, Group V
C4B63_32g139	0.084317	PRFA01000032:377,181..380,183(+)	trans-sialidase, Group VI
C4B63_32g187	0.084317	PRFA01000032:387,776..390,559(-)	trans-sialidase, Group V
C4B63_33g308	0.084317	PRFA01000033:175,475..178,468(-)	trans-sialidase, Group V
C4B63_33g276	0.084317	PRFA01000033:238,455..241,319(-)	trans-sialidase, Group VI
C4B63_36g85	0.084317	PRFA01000036:167,148..169,838(+)	trans-sialidase, Group V
C4B63_36g112	0.084317	PRFA01000036:236,314..239,136(+)	trans-sialidase, Group V
C4B63_36g117	0.084317	PRFA01000036:249,416..252,202(+)	trans-sialidase, Group V
C4B63_36g228	0.084317	PRFA01000036:345,700..348,540(-)	trans-sialidase, Group VI
C4B63_46g117	0.084317	PRFA01000046:325,822..327,147(+)	trans-sialidase, Group V
C4B63_49g216	0.084317	PRFA01000049:30,073..32,253(-)	trans-sialidase, Group II
C4B63_50g176	0.084317	PRFA01000050:152,737..155,499(-)	trans-sialidase, Group VI
C4B63_50g167	0.084317	PRFA01000050:174,364..177,246(-)	trans-sialidase, Group V
C4B63_59g231	0.084317	PRFA01000059:63,141..65,747(-)	trans-sialidase, Group V
C4B63_62g140	0.084317	PRFA01000062:134,851..137,487(-)	trans-sialidase, Group VI
C4B63_64g57	0.084317	PRFA01000064:97,929..100,406(+)	trans-sialidase, Group V
C4B63_65g19	0.084317	PRFA01000065:32,052..35,189(+)	trans-sialidase, Group VIII
C4B63_65g151	0.084317	PRFA01000065:185,588..188,218(-)	trans-sialidase, Group VI
C4B63_66g68	0.084317	PRFA01000066:163,226..165,697(+)	trans-sialidase, Group V
C4B63_67g211	0.084317	PRFA01000067:13,691..16,297(-)	trans-sialidase, Group VI
C4B63_67g15	0.084317	PRFA01000067:24,346..27,126(+)	trans-sialidase, Group VI
C4B63_69g50	0.084317	PRFA01000069:105,048..107,204(+)	trans-sialidase, Group I
C4B63_71g118	0.084317	PRFA01000071:153,176..155,929(-)	trans-sialidase, Group VI
C4B63_74g119	0.084317	PRFA01000074:79,714..82,380(-)	trans-sialidase, Group V
C4B63_86g82	0.084317	PRFA01000086:55,855..58,410(-)	trans-sialidase, Group V
C4B63_98g34	0.084317	PRFA01000098:82,037..84,211(+)	trans-sialidase
C4B63_105g64	0.084317	PRFA01000105:30,619..33,087(-)	trans-sialidase, Group II
C4B63_106g72	0.084317	PRFA01000106:24,160..26,715(-)	trans-sialidase, Group V
C4B63_107g78	0.084317	PRFA01000107:64,123..66,963(-)	trans-sialidase, Group VI
C4B63_109g65	0.084317	PRFA01000109:48,316..50,940(-)	trans-sialidase, Group IV
C4B63_109g60	0.084317	PRFA01000109:61,279..63,903(-)	trans-sialidase, Group IV
C4B63_122g41	0.084317	PRFA01000122:67,303..70,059(-)	trans-sialidase, Group V
C4B63_126g23	0.084317	PRFA01000126:51,573..54,305(+)	trans-sialidase, Group V
C4B63_141g8	0.084317	PRFA01000141:10,863..13,385(+)	trans-sialidase, Group II
C4B63_144g11	0.084317	PRFA01000144:21,477..24,029(+)	trans-sialidase, Group V
C4B63_157g40	0.084317	PRFA01000157:25,402..27,789(-)	trans-sialidase, Group II
C4B63_160g23	0.084317	PRFA01000160:44,838..47,285(+)	trans-sialidase, Group VIII
C4B63_167g40	0.084317	PRFA01000167:11,636..14,146(-)	trans-sialidase, Group I
C4B63_172g39	0.084317	PRFA01000172:19,219..21,837(-)	trans-sialidase, Group V
C4B63_240g5	0.084317	PRFA01000240:13,637..15,841(+)	trans-sialidase, Group II
C4B63_1g1147	0	PRFA01000001:641,015..643,501(-)	trans-sialidase
C4B63_1g1122	0	PRFA01000001:701,698..704,346(-)	trans-sialidase, Group V
C4B63_1g302	0	PRFA01000001:713,493..715,808(+)	trans-sialidase, Group VIII
C4B63_1g1075	0	PRFA01000001:810,382..813,084(-)	trans-sialidase, Group V
C4B63_1g1052	0	PRFA01000001:860,465..863,113(-)	trans-sialidase, Group V
C4B63_1g402	0	PRFA01000001:949,433..951,931(+)	trans-sialidase, Group VI
C4B63_1g941	0	PRFA01000001:1,078,012..1,080,369(-)	trans-sialidase, Group V
C4B63_1g604	0	PRFA01000001:1,387,028..1,389,694(+)	trans-sialidase
C4B63_3g938	0	PRFA01000003:407,483..410,248(-)	trans-sialidase, Group VI
C4B63_3g888	0	PRFA01000003:511,751..514,615(-)	trans-sialidase, Group VI
C4B63_3g405	0	PRFA01000003:907,102..909,897(+)	trans-sialidase, Group V
C4B63_3g667	0	PRFA01000003:958,812..961,604(-)	trans-sialidase, Group V
C4B63_8g102	0	PRFA01000008:371,675..374,452(+)	trans-sialidase, Group V
C4B63_8g123	0	PRFA01000008:409,931..412,708(+)	trans-sialidase, Group V
C4B63_8g129	0	PRFA01000008:423,432..426,200(+)	trans-sialidase, Group VI
C4B63_8g134	0	PRFA01000008:432,284..435,055(+)	trans-sialidase, Group V
C4B63_8g148	0	PRFA01000008:456,830..459,484(+)	trans-sialidase, Group V
C4B63_8g152	0	PRFA01000008:465,481..468,219(+)	trans-sialidase, Group V
C4B63_8g156	0	PRFA01000008:474,210..476,894(+)	trans-sialidase, Group V
C4B63_8g159	0	PRFA01000008:482,941..485,679(+)	trans-sialidase, Group V
C4B63_9g94	0	PRFA01000009:354,482..357,196(+)	trans-sialidase, Group V
C4B63_11g169	0	PRFA01000011:381,232..384,072(+)	trans-sialidase, Group VI
C4B63_11g196	0	PRFA01000011:464,535..467,645(+)	trans-sialidase, Group VIII
C4B63_14g140	0	PRFA01000014:312,873..315,230(+)	trans-sialidase, Group I
C4B63_14g128	0	PRFA01000014:289,585..291,942(+)	trans-sialidase, Group I
C4B63_15g27	0	PRFA01000015:55,105..57,777(+)	trans-sialidase
C4B63_15g501	0	PRFA01000015:104,750..107,503(-)	trans-sialidase, Group V
C4B63_15g382	0	PRFA01000015:335,816..338,524(-)	trans-sialidase, Group VI
C4B63_15g380	0	PRFA01000015:343,422..346,205(-)	trans-sialidase, Group V
C4B63_16g202	0	PRFA01000016:546,227..548,788(+)	trans-sialidase, Group II
C4B63_25g29	0	PRFA01000025:122,166..124,295(+)	trans-sialidase, Group I
C4B63_26g37	0	PRFA01000026:74,950..77,814(+)	trans-sialidase, Group V
C4B63_29g428	0	PRFA01000029:57,149..59,896(-)	trans-sialidase, Group V
C4B63_29g49	0	PRFA01000029:89,914..92,619(+)	trans-sialidase, Group V
C4B63_29g57	0	PRFA01000029:110,291..112,978(+)	trans-sialidase, Group V
C4B63_29g328	0	PRFA01000029:247,342..250,224(-)	trans-sialidase, Group VI
C4B63_33g41	0	PRFA01000033:93,377..96,139(+)	trans-sialidase, Group V
C4B63_33g44	0	PRFA01000033:101,376..104,069(+)	trans-sialidase, Group V
C4B63_33g61	0	PRFA01000033:143,885..146,455(+)	trans-sialidase, Group V
C4B63_33g67	0	PRFA01000033:151,461..154,274(+)	trans-sialidase, Group V
C4B63_34g136	0	PRFA01000034:371,906..374,566(+)	trans-sialidase, Group V
C4B63_36g54	0	PRFA01000036:102,343..105,114(+)	trans-sialidase, Group V
C4B63_36g308	0	PRFA01000036:156,563..159,400(-)	trans-sialidase, Group VI
C4B63_36g87	0	PRFA01000036:174,832..177,543(+)	trans-sialidase, Group V
C4B63_36g92	0	PRFA01000036:186,262..189,051(+)	trans-sialidase, Group V
C4B63_36g122	0	PRFA01000036:261,764..264,559(+)	trans-sialidase, Group V
C4B63_36g171	0	PRFA01000036:356,299..359,010(+)	trans-sialidase, Group V
C4B63_36g177	0	PRFA01000036:367,718..370,150(+)	trans-sialidase, Group V
C4B63_37g376	0	PRFA01000037:113,008..115,200(-)	trans-sialidase, Group II
C4B63_37g68	0	PRFA01000037:175,326..177,977(+)	trans-sialidase, Group VI
C4B63_37g181	0	PRFA01000037:354,996..357,737(+)	trans-sialidase, Group VI
C4B63_40g167	0	PRFA01000040:339,527..341,773(+)	trans-sialidase, Group II
C4B63_40g169	0	PRFA01000040:343,671..345,917(+)	trans-sialidase, Group II
C4B63_40g171	0	PRFA01000040:347,805..349,976(+)	trans-sialidase, Group II
C4B63_40g175	0	PRFA01000040:356,070..358,319(+)	trans-sialidase, Group II
C4B63_40g176	0	PRFA01000040:360,202..362,454(+)	trans-sialidase, Group II
C4B63_40g178	0	PRFA01000040:368,467..370,719(+)	trans-sialidase, Group II
C4B63_40g179	0	PRFA01000040:372,595..374,847(+)	trans-sialidase, Group II
C4B63_50g240	0	PRFA01000050:26,337..29,087(-)	trans-sialidase, Group VI
C4B63_50g228	0	PRFA01000050:46,964..49,708(-)	trans-sialidase, Group VI
C4B63_50g180	0	PRFA01000050:143,431..145,842(-)	trans-sialidase, Group V
C4B63_50g139	0	PRFA01000050:234,130..236,778(-)	trans-sialidase, Group VI
C4B63_51g225	0	PRFA01000051:39,854..40,951(-)	trans-sialidase, Group V
C4B63_52g93	0	PRFA01000052:267,382..269,550(-)	trans-sialidase
C4B63_59g222	0	PRFA01000059:81,316..83,922(-)	trans-sialidase, Group V
C4B63_62g184	0	PRFA01000062:70,265..71,509(-)	trans-sialidase, Group VI
C4B63_62g100	0	PRFA01000062:191,734..194,241(+)	trans-sialidase, Group II
C4B63_62g102	0	PRFA01000062:196,452..198,959(+)	trans-sialidase, Group II
C4B63_62g108	0	PRFA01000062:205,890..208,397(+)	trans-sialidase, Group II
C4B63_65g44	0	PRFA01000065:67,665..70,034(+)	trans-sialidase, Group II
C4B63_65g127	0	PRFA01000065:195,966..198,590(+)	trans-sialidase, Group VI
C4B63_66g53	0	PRFA01000066:127,409..130,255(+)	trans-sialidase, Group VI
C4B63_66g71	0	PRFA01000066:169,801..172,128(+)	trans-sialidase
C4B63_67g166	0	PRFA01000067:85,049..87,790(-)	trans-sialidase, Group VI
C4B63_71g168	0	PRFA01000071:85,103..87,766(-)	trans-sialidase, Group VI
C4B63_71g106	0	PRFA01000071:173,717..176,458(-)	trans-sialidase, Group VI
C4B63_93g4	0	PRFA01000093:5,685..7,958(+)	trans-sialidase, Group II
C4B63_93g6	0	PRFA01000093:9,838..12,111(+)	trans-sialidase, Group II
C4B63_94g93	0	PRFA01000094:15,786..18,260(-)	trans-sialidase, Group II
C4B63_96g86	0	PRFA01000096:29,613..32,306(-)	trans-sialidase, Group V
C4B63_96g82	0	PRFA01000096:37,556..40,369(-)	trans-sialidase, Group VI
C4B63_96g77	0	PRFA01000096:45,671..48,469(-)	trans-sialidase, Group V
C4B63_96g34	0	PRFA01000096:71,408..74,029(+)	trans-sialidase, Group V
C4B63_98g6	0	PRFA01000098:13,713..16,055(+)	trans-sialidase
C4B63_106g60	0	PRFA01000106:48,609..49,706(-)	trans-sialidase, Group V
C4B63_106g54	0	PRFA01000106:58,177..60,906(-)	trans-sialidase, Group V
C4B63_106g50	0	PRFA01000106:67,956..70,514(-)	trans-sialidase, Group V
C4B63_111g8	0	PRFA01000111:11,804..14,401(+)	trans-sialidase, Group V
C4B63_115g3	0	PRFA01000115:5,868..8,519(+)	trans-sialidase, Group V
C4B63_120g24	0	PRFA01000120:33,749..36,334(+)	trans-sialidase, Group V
C4B63_121g82	0	PRFA01000121:24,631..27,396(-)	trans-sialidase, Group VI
C4B63_125g69	0	PRFA01000125:22,157..25,021(-)	trans-sialidase, Group VI
C4B63_132g23	0	PRFA01000132:62,500..64,827(+)	trans-sialidase
C4B63_135g24	0	PRFA01000135:60,711..63,152(-)	trans-sialidase, Group V
C4B63_139g8	0	PRFA01000139:18,325..21,027(+)	trans-sialidase, Group V
C4B63_139g14	0	PRFA01000139:35,484..38,189(+)	trans-sialidase, Group V
C4B63_139g40	0	PRFA01000139:58,847..61,636(-)	trans-sialidase, Group V
C4B63_139g34	0	PRFA01000139:71,522..74,359(-)	trans-sialidase, Group VI
C4B63_144g5	0	PRFA01000144:6,744..8,936(+)	trans-sialidase, Group I
C4B63_151g45	0	PRFA01000151:30,993..33,581(-)	trans-sialidase, Group VI
C4B63_151g44	0	PRFA01000151:35,712..38,300(-)	trans-sialidase, Group VI
C4B63_173g10	0	PRFA01000173:16,520..17,683(+)	trans-sialidase, Group II
C4B63_232g21	0	PRFA01000232:33,473..35,635(-)	trans-sialidase, Group I
C4B63_244g6	0	PRFA01000244:10,600..12,729(+)	trans-sialidase, Group I
C4B63_244g7	0	PRFA01000244:13,906..16,035(+)	trans-sialidase, Group I
C4B63_244g8	0	PRFA01000244:17,211..19,340(+)	trans-sialidase, Group I
C4B63_244g9	0	PRFA01000244:20,515..22,644(+)	trans-sialidase, Group I
C4B63_305g4	0	PRFA01000305:12,691..14,874(+)	trans-sialidase, Group II
C4B63_319g9	0	PRFA01000319:20,144..22,396(+)	trans-sialidase, Group II
C4B63_387g18	0	PRFA01000387:7,056..9,305(-)	trans-sialidase, Group II
C4B63_387g14	0	PRFA01000387:15,340..17,589(-)	trans-sialidase, Group II

## Sheet: c) trypo 1
Supplementary File 4. Percentage of cells in which each TcTS is expressed in trypomastigote cell population
c) Trypomastigote cells corresponding to the trypo_ 1 cluster
Gene	Percent_Expressed	Genomic Location	Product Description
C4B63_84g32	73.9901	PRFA01000084:112,926..115,919(+)	trans-sialidase, Group VIII
C4B63_156g20	64.0394	PRFA01000156:62,715..65,828(+)	trans-sialidase, Group VIII
C4B63_22g135	61.6749	PRFA01000022:368,932..371,229(+)	trans-sialidase, Group V
C4B63_86g95	57.0443	PRFA01000086:19,909..22,740(-)	trans-sialidase, Group III
C4B63_260g23	55.468	PRFA01000260:12,692..15,079(-)	trans-sialidase, Group II
C4B63_14g229	48.1773	PRFA01000014:514,917..517,280(+)	trans-sialidase, Group II
C4B63_135g26	46.4039	PRFA01000135:56,137..58,578(-)	trans-sialidase, Group V
C4B63_40g138	44.6305	PRFA01000040:281,437..283,686(+)	trans-sialidase, Group II
C4B63_361g15	43.4483	PRFA01000361:7,220..9,532(-)	trans-sialidase, Group V
C4B63_419g2	42.1675	PRFA01000419:7,079..9,895(+)	trans-sialidase
C4B63_51g210	41.4778	PRFA01000051:83,519..85,831(-)	trans-sialidase, Group V
C4B63_568g1	40.5911	PRFA01000568:701..3,013(+)	trans-sialidase, Group II
C4B63_145g11	39.0148	PRFA01000145:18,864..21,878(+)	trans-sialidase, Group III
C4B63_65g71	36.4532	PRFA01000065:109,450..111,816(+)	trans-sialidase, Group II
C4B63_49g210	35.8621	PRFA01000049:41,857..44,958(-)	trans-sialidase, Group VIII
C4B63_47g122	33.7931	PRFA01000047:276,278..279,022(+)	trans-sialidase
C4B63_1g82	32.8079	PRFA01000001:172,679..175,297(+)	trans-sialidase, Group II
C4B63_8g108	32.2167	PRFA01000008:385,177..387,945(+)	trans-sialidase, Group VI
C4B63_35g193	31.7241	PRFA01000035:399,901..403,020(+)	trans-sialidase, Group VIII
C4B63_8g77	30.8374	PRFA01000008:322,968..325,751(+)	trans-sialidase, Group VI
C4B63_47g92	30.8374	PRFA01000047:221,928..224,669(+)	trans-sialidase
C4B63_156g18	30.7389	PRFA01000156:46,341..49,283(+)	trans-sialidase
C4B63_1g480	30.3448	PRFA01000001:1,136,009..1,138,369(+)	trans-sialidase, Group V
C4B63_145g23	29.7537	PRFA01000145:44,960..47,980(+)	trans-sialidase, Group III
C4B63_1g788	28.5714	PRFA01000001:1,471,299..1,474,469(-)	trans-sialidase, Group VIII
C4B63_387g16	28.1773	PRFA01000387:11,197..13,446(-)	trans-sialidase, Group II
C4B63_8g282	27.9803	PRFA01000008:699,125..701,524(-)	trans-sialidase, Group V
C4B63_35g347	26.5025	PRFA01000035:98,010..101,138(-)	trans-sialidase, Group VIII
C4B63_72g38	26.2069	PRFA01000072:171,093..173,552(+)	trans-sialidase, Group II
C4B63_31g119	26.1084	PRFA01000031:348,644..350,296(+)	trans-sialidase, Group II
C4B63_41g261	26.0099	PRFA01000041:100,724..103,444(-)	trans-sialidase, Group IV
C4B63_73g11	25.6158	PRFA01000073:19,000..21,672(+)	trans-sialidase, Group IV
C4B63_1g1102	23.7438	PRFA01000001:746,689..749,064(-)	trans-sialidase, Group V
C4B63_77g67	23.1527	PRFA01000077:131,426..134,452(+)	trans-sialidase, Group III
C4B63_124g40	23.1527	PRFA01000124:73,808..76,945(+)	trans-sialidase, Group VIII
C4B63_5g740	22.7586	PRFA01000005:141,333..143,702(-)	trans-sialidase, Group V
C4B63_77g40	21.7734	PRFA01000077:83,041..86,067(+)	trans-sialidase, Group III
C4B63_67g26	21.5764	PRFA01000067:42,473..44,839(+)	trans-sialidase, Group II
C4B63_68g103	21.3793	PRFA01000068:89,317..91,599(-)	trans-sialidase, Group II
C4B63_455g9	21.3793	PRFA01000455:8,884..11,385(+)	trans-sialidase, Group VII
C4B63_155g17	20.5911	PRFA01000155:55,219..57,597(+)	trans-sialidase, Group II
C4B63_14g138	20.0985	PRFA01000014:308,216..310,573(+)	trans-sialidase, Group I
C4B63_35g363	20.0985	PRFA01000035:64,808..68,272(-)	trans-sialidase, Group VIII
C4B63_1g368	19.803	PRFA01000001:870,745..873,915(+)	trans-sialidase, Group VIII
C4B63_75g105	19.6059	PRFA01000075:20,689..23,199(-)	trans-sialidase, Group II
C4B63_164g14	19.6059	PRFA01000164:36,856..39,270(+)	trans-sialidase, Group II
C4B63_157g46	19.4089	PRFA01000157:4,994..7,174(-)	trans-sialidase, Group II
C4B63_131g42	19.3103	PRFA01000131:68,466..70,952(-)	trans-sialidase, Group II
C4B63_156g6	19.3103	PRFA01000156:11,865..14,609(+)	trans-sialidase
C4B63_5g493	19.2118	PRFA01000005:732,084..734,423(-)	trans-sialidase, Group V
C4B63_69g34	19.0148	PRFA01000069:71,267..73,945(+)	trans-sialidase, Group I
C4B63_5g393	18.6207	PRFA01000005:861,389..863,737(+)	trans-sialidase, Group V
C4B63_34g137	17.8325	PRFA01000034:376,631..379,315(+)	trans-sialidase, Group IV
C4B63_1g201	17.5369	PRFA01000001:439,502..441,838(+)	trans-sialidase, Group V
C4B63_27g266	17.5369	PRFA01000027:178,047..180,377(-)	trans-sialidase, Group V
C4B63_154g5	17.3399	PRFA01000154:9,166..11,688(+)	trans-sialidase, Group II
C4B63_145g21	17.1429	PRFA01000145:36,872..39,640(+)	trans-sialidase, Group IV
C4B63_260g20	17.0443	PRFA01000260:21,258..23,423(-)	trans-sialidase, Group II
C4B63_42g262	16.6502	PRFA01000042:17,498..20,617(-)	trans-sialidase, Group VIII
C4B63_105g53	16.6502	PRFA01000105:59,307..62,435(-)	trans-sialidase, Group VIII
C4B63_50g98	16.2562	PRFA01000050:274,407..276,740(+)	trans-sialidase, Group V
C4B63_131g47	16.0591	PRFA01000131:45,359..47,881(-)	trans-sialidase, Group II
C4B63_5g433	15.8621	PRFA01000005:879,574..881,370(-)	trans-sialidase, Group V
C4B63_77g50	15.665	PRFA01000077:101,051..103,819(+)	trans-sialidase, Group IV
C4B63_305g8	15.468	PRFA01000305:21,580..23,763(+)	trans-sialidase, Group II
C4B63_64g80	15.2709	PRFA01000064:142,317..144,785(+)	trans-sialidase, Group V
C4B63_119g19	15.1724	PRFA01000119:44,859..47,987(+)	trans-sialidase, Group VIII
C4B63_37g415	15.0739	PRFA01000037:14,305..17,439(-)	trans-sialidase, Group VIII
C4B63_1g473	14.0887	PRFA01000001:1,118,975..1,121,704(+)	trans-sialidase
C4B63_105g61	13.4975	PRFA01000105:38,825..41,008(-)	trans-sialidase, Group II
C4B63_360g18	13.3005	PRFA01000360:4,370..6,733(-)	trans-sialidase, Group II
C4B63_162g7	12.8079	PRFA01000162:30,539..33,244(+)	trans-sialidase, Group II
C4B63_5g376	12.7094	PRFA01000005:818,787..821,297(+)	trans-sialidase, Group V
C4B63_71g189	12.7094	PRFA01000071:51,916..54,288(-)	trans-sialidase, Group II
C4B63_5g356	12.5123	PRFA01000005:776,490..778,823(+)	trans-sialidase, Group V
C4B63_95g6	12.5123	PRFA01000095:10,668..13,016(+)	trans-sialidase, Group V
C4B63_109g61	12.3153	PRFA01000109:56,679..58,856(-)	trans-sialidase, Group II
C4B63_64g142	12.1182	PRFA01000064:163,872..165,713(-)	trans-sialidase, Group V
C4B63_23g158	11.9212	PRFA01000023:465,478..468,426(-)	trans-sialidase
C4B63_311g19	11.8227	PRFA01000311:19,592..22,063(-)	trans-sialidase, Group V
C4B63_111g19	11.6256	PRFA01000111:39,478..42,114(+)	trans-sialidase, Group V
C4B63_32g172	10.936	PRFA01000032:428,939..431,188(+)	trans-sialidase, Group II
C4B63_35g136	10.936	PRFA01000035:284,751..287,267(+)	trans-sialidase, Group V
C4B63_105g66	10.6404	PRFA01000105:19,602..22,724(-)	trans-sialidase, Group VIII
C4B63_59g52	10.3448	PRFA01000059:53,109..55,514(+)	trans-sialidase, Group V
C4B63_134g49	9.26108	PRFA01000134:42,534..45,068(-)	trans-sialidase, Group V
C4B63_105g45	9.06404	PRFA01000105:96,607..99,732(-)	trans-sialidase, Group VIII
C4B63_10g538	8.96552	PRFA01000010:13,600..15,972(-)	trans-sialidase, Group II
C4B63_134g54	8.96552	PRFA01000134:31,543..34,077(-)	trans-sialidase, Group V
C4B63_39g233	8.867	PRFA01000039:291,339..294,047(-)	trans-sialidase, Group V
C4B63_131g50	8.57143	PRFA01000131:28,317..30,872(-)	trans-sialidase, Group I
C4B63_47g128	8.27586	PRFA01000047:299,654..302,398(+)	trans-sialidase
C4B63_119g31	8.07882	PRFA01000119:63,765..66,887(+)	trans-sialidase, Group VIII
C4B63_35g143	7.9803	PRFA01000035:295,763..298,270(+)	trans-sialidase, Group V
C4B63_1g748	7.68473	PRFA01000001:1,569,094..1,572,237(-)	trans-sialidase, Group VIII
C4B63_111g12	7.68473	PRFA01000111:23,438..26,056(+)	trans-sialidase, Group V
C4B63_141g33	7.68473	PRFA01000141:69,994..72,696(+)	trans-sialidase, Group I
C4B63_146g45	7.68473	PRFA01000146:22,084..24,801(-)	trans-sialidase, Group VI
C4B63_75g91	7.38916	PRFA01000075:59,858..62,374(-)	trans-sialidase, Group II
C4B63_34g140	7.0936	PRFA01000034:387,220..389,931(+)	trans-sialidase, Group IV
C4B63_119g5	6.99507	PRFA01000119:12,073..15,201(+)	trans-sialidase, Group VIII
C4B63_31g250	6.79803	PRFA01000031:62,906..65,686(-)	trans-sialidase, Group V
C4B63_35g131	6.69951	PRFA01000035:273,505..275,994(+)	trans-sialidase, Group V
C4B63_60g89	6.69951	PRFA01000060:206,350..209,010(-)	trans-sialidase, Group V
C4B63_174g27	6.69951	PRFA01000174:39,635..42,118(-)	trans-sialidase, Group V
C4B63_91g81	6.50246	PRFA01000091:39,926..42,382(-)	trans-sialidase, Group II
C4B63_148g10	6.50246	PRFA01000148:13,536..16,949(+)	trans-sialidase, Group VIII
C4B63_1g794	6.40394	PRFA01000001:1,445,059..1,447,425(-)	trans-sialidase, Group V
C4B63_12g268	6.40394	PRFA01000012:345,535..348,372(-)	trans-sialidase, Group VI
C4B63_27g282	6.2069	PRFA01000027:136,078..138,537(-)	trans-sialidase, Group V
C4B63_27g327	6.10837	PRFA01000027:47,628..50,108(-)	trans-sialidase, Group V
C4B63_3g1132	6.00985	PRFA01000003:27,211..29,661(-)	trans-sialidase, Group I
C4B63_31g257	6.00985	PRFA01000031:45,089..47,716(-)	trans-sialidase, Group V
C4B63_3g1037	5.91133	PRFA01000003:214,189..216,876(-)	trans-sialidase, Group V
C4B63_31g230	5.91133	PRFA01000031:117,214..119,808(-)	trans-sialidase, Group V
C4B63_37g106	5.81281	PRFA01000037:239,436..242,204(+)	trans-sialidase, Group VI
C4B63_61g27	5.81281	PRFA01000061:105,507..107,753(+)	trans-sialidase, Group I
C4B63_8g285	5.61576	PRFA01000008:690,013..692,379(-)	trans-sialidase, Group V
C4B63_60g110	5.51724	PRFA01000060:172,043..174,670(-)	trans-sialidase, Group V
C4B63_49g199	5.41872	PRFA01000049:71,490..73,673(-)	trans-sialidase, Group II
C4B63_5g131	5.3202	PRFA01000005:303,345..305,744(+)	trans-sialidase, Group V
C4B63_41g277	5.3202	PRFA01000041:61,004..63,181(-)	trans-sialidase, Group II
C4B63_39g377	5.22167	PRFA01000039:1,682..4,558(-)	trans-sialidase, Group VIII
C4B63_68g134	5.22167	PRFA01000068:10,310..12,529(-)	trans-sialidase, Group II
C4B63_136g6	5.22167	PRFA01000136:12,982..15,984(+)	trans-sialidase, Group I
C4B63_1g176	5.12315	PRFA01000001:374,385..377,222(+)	trans-sialidase
C4B63_31g233	5.12315	PRFA01000031:106,345..108,942(-)	trans-sialidase, Group V
C4B63_39g154	5.12315	PRFA01000039:361,021..363,426(+)	trans-sialidase, Group V
C4B63_75g84	5.02463	PRFA01000075:74,499..77,009(-)	trans-sialidase, Group VII
C4B63_118g10	4.92611	PRFA01000118:37,211..39,394(+)	trans-sialidase, Group II
C4B63_37g89	4.72906	PRFA01000037:203,044..205,914(+)	trans-sialidase, Group VI
C4B63_109g58	4.72906	PRFA01000109:65,971..68,802(-)	trans-sialidase, Group V
C4B63_180g6	4.72906	PRFA01000180:8,959..11,220(+)	trans-sialidase, Group II
C4B63_31g260	4.63054	PRFA01000031:34,220..36,823(-)	trans-sialidase, Group V
C4B63_1g782	4.53202	PRFA01000001:1,482,436..1,484,955(-)	trans-sialidase, Group V
C4B63_6g579	4.53202	PRFA01000006:62,302..64,377(-)	trans-sialidase, Group I
C4B63_1g702	4.4335	PRFA01000001:1,599,069..1,601,807(+)	trans-sialidase, Group V
C4B63_11g376	4.4335	PRFA01000011:358,411..361,422(-)	trans-sialidase, Group VI
C4B63_37g189	4.4335	PRFA01000037:369,320..372,184(+)	trans-sialidase, Group VI
C4B63_305g1	4.4335	PRFA01000305:3,828..6,011(+)	trans-sialidase, Group II
C4B63_31g238	4.33498	PRFA01000031:95,678..98,278(-)	trans-sialidase, Group V
C4B63_17g208	4.23645	PRFA01000017:474,010..477,420(-)	trans-sialidase, Group VIII
C4B63_31g255	4.13793	PRFA01000031:51,974..54,586(-)	trans-sialidase, Group V
C4B63_35g154	4.13793	PRFA01000035:317,819..320,602(+)	trans-sialidase, Group V
C4B63_5g328	3.94089	PRFA01000005:718,572..721,232(+)	trans-sialidase, Group VI
C4B63_29g223	3.94089	PRFA01000029:436,970..439,138(+)	trans-sialidase, Group II
C4B63_37g206	3.84236	PRFA01000037:388,570..391,191(+)	trans-sialidase, Group VI
C4B63_53g223	3.84236	PRFA01000053:67,486..70,131(-)	trans-sialidase
C4B63_106g19	3.84236	PRFA01000106:36,145..38,850(+)	trans-sialidase, Group V
C4B63_27g306	3.74384	PRFA01000027:85,847..88,330(-)	trans-sialidase, Group V
C4B63_43g83	3.64532	PRFA01000043:324,804..327,029(+)	trans-sialidase, Group II
C4B63_134g39	3.64532	PRFA01000134:64,917..67,412(-)	trans-sialidase, Group V
C4B63_77g53	3.5468	PRFA01000077:112,536..115,550(+)	trans-sialidase, Group III
C4B63_108g29	3.5468	PRFA01000108:63,381..65,555(+)	trans-sialidase, Group II
C4B63_146g39	3.5468	PRFA01000146:39,496..42,354(-)	trans-sialidase, Group V
C4B63_29g292	3.44828	PRFA01000029:301,383..303,998(-)	trans-sialidase, Group V
C4B63_21g168	3.34975	PRFA01000021:454,990..457,206(+)	trans-sialidase, Group II
C4B63_37g381	3.34975	PRFA01000037:99,345..101,534(-)	trans-sialidase, Group II
C4B63_94g89	3.34975	PRFA01000094:23,028..25,244(-)	trans-sialidase, Group II
C4B63_5g44	3.25123	PRFA01000005:99,687..102,368(+)	trans-sialidase, Group V
C4B63_46g113	3.15271	PRFA01000046:314,707..317,025(+)	trans-sialidase, Group V
C4B63_68g111	3.15271	PRFA01000068:53,256..55,460(-)	trans-sialidase, Group II
C4B63_96g38	3.15271	PRFA01000096:82,277..84,898(+)	trans-sialidase, Group V
C4B63_67g29	3.05419	PRFA01000067:46,850..49,465(+)	trans-sialidase, Group VI
C4B63_13g14	2.95567	PRFA01000013:36,346..38,766(+)	trans-sialidase, Group V
C4B63_17g205	2.95567	PRFA01000017:483,248..486,661(-)	trans-sialidase, Group VIII
C4B63_35g148	2.95567	PRFA01000035:306,763..309,273(+)	trans-sialidase, Group V
C4B63_1g585	2.85714	PRFA01000001:1,338,439..1,341,192(+)	trans-sialidase, Group V
C4B63_134g44	2.75862	PRFA01000134:53,726..56,215(-)	trans-sialidase, Group V
C4B63_26g358	2.46305	PRFA01000026:4,310..7,117(-)	trans-sialidase, Group VI
C4B63_29g141	2.46305	PRFA01000029:282,353..285,058(+)	trans-sialidase, Group V
C4B63_166g26	2.46305	PRFA01000166:57,228..60,299(+)	trans-sialidase, Group VIII
C4B63_240g10	2.46305	PRFA01000240:25,502..27,745(+)	trans-sialidase, Group II
C4B63_72g4	2.36453	PRFA01000072:7,177..9,411(+)	trans-sialidase, Group II
C4B63_60g204	2.26601	PRFA01000060:3,003..6,158(-)	trans-sialidase
C4B63_77g60	2.26601	PRFA01000077:122,003..125,029(+)	trans-sialidase, Group III
C4B63_88g29	2.26601	PRFA01000088:63,137..65,938(+)	trans-sialidase, Group V
C4B63_50g193	2.16749	PRFA01000050:107,484..110,093(-)	trans-sialidase, Group VI
C4B63_64g133	2.16749	PRFA01000064:174,092..176,785(-)	trans-sialidase, Group V
C4B63_71g178	2.16749	PRFA01000071:63,111..65,753(-)	trans-sialidase, Group VI
C4B63_134g59	2.16749	PRFA01000134:20,603..23,098(-)	trans-sialidase, Group V
C4B63_155g10	2.16749	PRFA01000155:22,472..24,649(+)	trans-sialidase
C4B63_124g14	2.06897	PRFA01000124:19,259..21,700(+)	trans-sialidase, Group V
C4B63_158g35	1.97044	PRFA01000158:46,073..48,439(-)	trans-sialidase, Group II
C4B63_8g240	1.87192	PRFA01000008:672,820..675,600(+)	trans-sialidase, Group VI
C4B63_16g181	1.87192	PRFA01000016:474,095..477,115(+)	trans-sialidase, Group VIII
C4B63_21g182	1.87192	PRFA01000021:489,376..491,592(+)	trans-sialidase, Group II
C4B63_66g57	1.87192	PRFA01000066:140,104..142,950(+)	trans-sialidase, Group VI
C4B63_66g146	1.87192	PRFA01000066:113,285..115,564(-)	trans-sialidase, Group V
C4B63_67g177	1.87192	PRFA01000067:67,772..70,612(-)	trans-sialidase, Group VI
C4B63_33g167	1.7734	PRFA01000033:368,510..370,675(+)	trans-sialidase, Group II
C4B63_39g55	1.7734	PRFA01000039:144,094..146,433(+)	trans-sialidase, Group V
C4B63_39g66	1.7734	PRFA01000039:165,864..168,182(+)	trans-sialidase, Group V
C4B63_132g20	1.7734	PRFA01000132:55,925..58,396(+)	trans-sialidase, Group V
C4B63_3g1069	1.67488	PRFA01000003:144,195..146,816(-)	trans-sialidase, Group V
C4B63_13g176	1.67488	PRFA01000013:564,130..566,337(+)	trans-sialidase, Group VIII
C4B63_16g197	1.57635	PRFA01000016:526,611..529,733(+)	trans-sialidase, Group VIII
C4B63_39g111	1.57635	PRFA01000039:268,190..270,583(+)	trans-sialidase, Group V
C4B63_43g92	1.57635	PRFA01000043:345,624..348,758(+)	trans-sialidase, Group VIII
C4B63_60g203	1.57635	PRFA01000060:8,389..10,779(-)	trans-sialidase, Group II
C4B63_72g6	1.57635	PRFA01000072:13,146..15,506(+)	trans-sialidase, Group II
C4B63_99g97	1.57635	PRFA01000099:32,257..34,839(-)	trans-sialidase, Group V
C4B63_299g15	1.57635	PRFA01000299:19,555..22,236(-)	trans-sialidase, Group V
C4B63_56g144	1.47783	PRFA01000056:49,562..51,958(-)	trans-sialidase, Group V
C4B63_72g19	1.47783	PRFA01000072:108,008..110,512(+)	trans-sialidase, Group II
C4B63_223g5	1.47783	PRFA01000223:7,799..10,426(+)	trans-sialidase, Group VI
C4B63_3g567	1.37931	PRFA01000003:1,195,129..1,197,474(-)	trans-sialidase, Group V
C4B63_27g322	1.37931	PRFA01000027:57,467..60,064(-)	trans-sialidase, Group V
C4B63_99g72	1.28079	PRFA01000099:83,462..84,658(-)	trans-sialidase, Group V
C4B63_15g389	1.18227	PRFA01000015:312,409..314,898(-)	trans-sialidase, Group II
C4B63_15g419	1.18227	PRFA01000015:253,587..256,349(-)	trans-sialidase, Group V
C4B63_58g227	1.18227	PRFA01000058:28,956..32,099(-)	trans-sialidase, Group VIII
C4B63_116g59	1.18227	PRFA01000116:62,097..64,934(-)	trans-sialidase, Group VI
C4B63_3g943	1.08374	PRFA01000003:399,286..401,730(-)	trans-sialidase, Group V
C4B63_296g27	1.08374	PRFA01000296:4,538..6,862(-)	trans-sialidase, Group V
C4B63_1g806	0.985222	PRFA01000001:1,424,024..1,426,450(-)	trans-sialidase, Group V
C4B63_27g337	0.985222	PRFA01000027:27,838..30,174(-)	trans-sialidase, Group V
C4B63_88g102	0.985222	PRFA01000088:31,196..33,796(-)	trans-sialidase, Group V
C4B63_98g22	0.985222	PRFA01000098:51,172..52,926(+)	trans-sialidase
C4B63_154g15	0.985222	PRFA01000154:36,403..38,817(+)	trans-sialidase, Group I
C4B63_3g760	0.8867	PRFA01000003:779,145..781,583(-)	trans-sialidase, Group V
C4B63_37g122	0.8867	PRFA01000037:267,103..269,520(+)	trans-sialidase, Group V
C4B63_39g175	0.8867	PRFA01000039:400,674..403,397(-)	trans-sialidase, Group V
C4B63_50g133	0.8867	PRFA01000050:247,425..249,839(-)	trans-sialidase, Group V
C4B63_223g15	0.8867	PRFA01000223:19,069..21,462(+)	trans-sialidase, Group V
C4B63_310g9	0.8867	PRFA01000310:18,676..21,033(+)	trans-sialidase, Group I
C4B63_5g349	0.788177	PRFA01000005:759,408..762,176(+)	trans-sialidase
C4B63_23g10	0.788177	PRFA01000023:24,644..27,766(+)	trans-sialidase, Group VIII
C4B63_25g331	0.788177	PRFA01000025:7,231..9,360(-)	trans-sialidase, Group I
C4B63_31g263	0.788177	PRFA01000031:23,429..26,176(-)	trans-sialidase, Group V
C4B63_36g369	0.788177	PRFA01000036:14,565..17,399(-)	trans-sialidase, Group VI
C4B63_38g189	0.788177	PRFA01000038:393,107..395,422(+)	trans-sialidase, Group II
C4B63_126g15	0.788177	PRFA01000126:34,352..37,081(+)	trans-sialidase, Group V
C4B63_172g39	0.788177	PRFA01000172:19,219..21,837(-)	trans-sialidase, Group V
C4B63_191g3	0.788177	PRFA01000191:15,588..18,446(+)	trans-sialidase, Group VI
C4B63_240g3	0.788177	PRFA01000240:7,695..9,899(+)	trans-sialidase, Group II
C4B63_1g164	0.689655	PRFA01000001:344,645..347,239(+)	trans-sialidase, Group V
C4B63_1g666	0.689655	PRFA01000001:1,528,593..1,531,019(+)	trans-sialidase, Group V
C4B63_3g815	0.689655	PRFA01000003:657,099..659,867(-)	trans-sialidase, Group V
C4B63_3g791	0.689655	PRFA01000003:713,840..716,278(-)	trans-sialidase, Group V
C4B63_3g646	0.689655	PRFA01000003:1,000,130..1,002,976(-)	trans-sialidase, Group V
C4B63_3g621	0.689655	PRFA01000003:1,068,211..1,070,631(-)	trans-sialidase, Group V
C4B63_5g121	0.689655	PRFA01000005:280,559..283,225(+)	trans-sialidase, Group V
C4B63_5g538	0.689655	PRFA01000005:645,772..648,177(-)	trans-sialidase, Group V
C4B63_9g109	0.689655	PRFA01000009:383,649..386,207(+)	trans-sialidase, Group V
C4B63_11g198	0.689655	PRFA01000011:472,746..475,766(+)	trans-sialidase, Group VI
C4B63_25g269	0.689655	PRFA01000025:147,303..149,504(-)	trans-sialidase, Group II
C4B63_37g98	0.689655	PRFA01000037:217,495..220,128(+)	trans-sialidase, Group VI
C4B63_41g263	0.689655	PRFA01000041:95,679..98,399(-)	trans-sialidase, Group IV
C4B63_50g188	0.689655	PRFA01000050:120,750..123,167(-)	trans-sialidase, Group V
C4B63_78g60	0.689655	PRFA01000078:135,231..138,008(+)	trans-sialidase, Group V
C4B63_136g25	0.689655	PRFA01000136:49,782..52,400(+)	trans-sialidase, Group V
C4B63_15g332	0.591133	PRFA01000015:445,563..448,286(-)	trans-sialidase, Group V
C4B63_15g269	0.591133	PRFA01000015:541,746..544,508(+)	trans-sialidase, Group V
C4B63_27g302	0.591133	PRFA01000027:96,382..98,700(-)	trans-sialidase, Group V
C4B63_27g292	0.591133	PRFA01000027:115,024..117,609(-)	trans-sialidase, Group V
C4B63_29g108	0.591133	PRFA01000029:210,837..213,728(+)	trans-sialidase, Group V
C4B63_33g38	0.591133	PRFA01000033:85,763..88,132(+)	trans-sialidase, Group V
C4B63_33g278	0.591133	PRFA01000033:230,495..233,389(-)	trans-sialidase, Group VI
C4B63_37g143	0.591133	PRFA01000037:292,745..295,495(+)	trans-sialidase, Group VI
C4B63_60g90	0.591133	PRFA01000060:202,644..205,256(-)	trans-sialidase, Group V
C4B63_74g14	0.591133	PRFA01000074:25,644..28,364(+)	trans-sialidase, Group V
C4B63_74g55	0.591133	PRFA01000074:109,921..112,644(+)	trans-sialidase, Group V
C4B63_105g48	0.591133	PRFA01000105:86,128..88,809(-)	trans-sialidase, Group IV
C4B63_1g1079	0.492611	PRFA01000001:800,976..803,354(-)	trans-sialidase, Group V
C4B63_1g780	0.492611	PRFA01000001:1,497,214..1,499,622(-)	trans-sialidase, Group V
C4B63_3g582	0.492611	PRFA01000003:1,144,867..1,147,563(-)	trans-sialidase, Group V
C4B63_3g580	0.492611	PRFA01000003:1,153,054..1,155,921(-)	trans-sialidase, Group VI
C4B63_5g551	0.492611	PRFA01000005:620,860..623,235(-)	trans-sialidase, Group II
C4B63_5g374	0.492611	PRFA01000005:810,877..813,537(+)	trans-sialidase
C4B63_11g338	0.492611	PRFA01000011:435,810..438,578(-)	trans-sialidase, Group V
C4B63_15g308	0.492611	PRFA01000015:496,654..499,080(-)	trans-sialidase, Group V
C4B63_24g250	0.492611	PRFA01000024:258,226..260,565(-)	trans-sialidase, Group V
C4B63_26g55	0.492611	PRFA01000026:101,992..104,616(+)	trans-sialidase, Group V
C4B63_33g293	0.492611	PRFA01000033:209,015..211,597(-)	trans-sialidase, Group V
C4B63_35g334	0.492611	PRFA01000035:131,305..134,436(-)	trans-sialidase, Group VIII
C4B63_36g364	0.492611	PRFA01000036:27,036..29,462(-)	trans-sialidase, Group V
C4B63_46g181	0.492611	PRFA01000046:23,225..26,356(-)	trans-sialidase, Group VIII
C4B63_53g214	0.492611	PRFA01000053:88,917..92,054(-)	trans-sialidase, Group VIII
C4B63_68g131	0.492611	PRFA01000068:14,729..17,206(-)	trans-sialidase, Group II
C4B63_71g196	0.492611	PRFA01000071:32,848..35,460(-)	trans-sialidase, Group VI
C4B63_88g97	0.492611	PRFA01000088:42,203..44,686(-)	trans-sialidase, Group V
C4B63_98g38	0.492611	PRFA01000098:104,681..107,059(+)	trans-sialidase, Group II
C4B63_130g39	0.492611	PRFA01000130:29,592..32,090(-)	trans-sialidase, Group II
C4B63_159g15	0.492611	PRFA01000159:43,145..46,288(+)	trans-sialidase, Group VIII
C4B63_417g17	0.492611	PRFA01000417:10,113..12,431(-)	trans-sialidase, Group V
C4B63_1g1397	0.394089	PRFA01000001:23,286..25,469(-)	trans-sialidase, Group II
C4B63_1g819	0.394089	PRFA01000001:1,400,040..1,402,877(-)	trans-sialidase, Group VI
C4B63_3g112	0.394089	PRFA01000003:267,639..270,449(+)	trans-sialidase, Group VI
C4B63_3g1003	0.394089	PRFA01000003:278,419..281,196(-)	trans-sialidase, Group V
C4B63_3g400	0.394089	PRFA01000003:896,031..898,712(+)	trans-sialidase, Group VI
C4B63_5g752	0.394089	PRFA01000005:118,763..121,180(-)	trans-sialidase, Group V
C4B63_5g75	0.394089	PRFA01000005:175,807..178,440(+)	trans-sialidase, Group V
C4B63_5g102	0.394089	PRFA01000005:219,635..222,274(+)	trans-sialidase, Group V
C4B63_8g143	0.394089	PRFA01000008:448,196..450,850(+)	trans-sialidase, Group V
C4B63_11g425	0.394089	PRFA01000011:251,963..254,827(-)	trans-sialidase, Group VI
C4B63_11g151	0.394089	PRFA01000011:339,431..342,262(+)	trans-sialidase, Group VI
C4B63_14g140	0.394089	PRFA01000014:312,873..315,230(+)	trans-sialidase, Group I
C4B63_15g34	0.394089	PRFA01000015:65,751..68,099(+)	trans-sialidase, Group V
C4B63_15g397	0.394089	PRFA01000015:297,319..300,126(-)	trans-sialidase, Group V
C4B63_36g85	0.394089	PRFA01000036:167,148..169,838(+)	trans-sialidase, Group V
C4B63_38g310	0.394089	PRFA01000038:19,484..22,597(-)	trans-sialidase, Group VIII
C4B63_47g125	0.394089	PRFA01000047:287,975..290,725(+)	trans-sialidase
C4B63_62g172	0.394089	PRFA01000062:87,106..89,847(-)	trans-sialidase, Group VI
C4B63_64g186	0.394089	PRFA01000064:48,361..50,751(-)	trans-sialidase, Group V
C4B63_69g42	0.394089	PRFA01000069:85,977..88,484(+)	trans-sialidase, Group V
C4B63_74g138	0.394089	PRFA01000074:37,843..40,497(-)	trans-sialidase, Group V
C4B63_75g72	0.394089	PRFA01000075:100,520..103,231(-)	trans-sialidase, Group IV
C4B63_91g93	0.394089	PRFA01000091:10,336..13,449(-)	trans-sialidase, Group VIII
C4B63_157g40	0.394089	PRFA01000157:25,402..27,789(-)	trans-sialidase, Group II
C4B63_197g26	0.394089	PRFA01000197:23,058..25,829(-)	trans-sialidase, Group V
C4B63_1g94	0.295567	PRFA01000001:201,704..204,193(+)	trans-sialidase, Group II
C4B63_1g1308	0.295567	PRFA01000001:309,008..311,614(-)	trans-sialidase
C4B63_1g1263	0.295567	PRFA01000001:399,835..402,318(-)	trans-sialidase, Group V
C4B63_1g1075	0.295567	PRFA01000001:810,382..813,084(-)	trans-sialidase, Group V
C4B63_1g436	0.295567	PRFA01000001:1,020,171..1,022,861(+)	trans-sialidase
C4B63_3g1046	0.295567	PRFA01000003:202,145..204,976(-)	trans-sialidase, Group VI
C4B63_3g105	0.295567	PRFA01000003:252,648..255,422(+)	trans-sialidase, Group V
C4B63_3g981	0.295567	PRFA01000003:322,088..324,541(-)	trans-sialidase, Group V
C4B63_3g211	0.295567	PRFA01000003:480,378..483,236(+)	trans-sialidase, Group VI
C4B63_3g776	0.295567	PRFA01000003:744,634..747,477(-)	trans-sialidase, Group VI
C4B63_3g357	0.295567	PRFA01000003:805,024..807,723(+)	trans-sialidase, Group V
C4B63_3g613	0.295567	PRFA01000003:1,088,776..1,091,586(-)	trans-sialidase, Group V
C4B63_3g575	0.295567	PRFA01000003:1,176,684..1,179,530(-)	trans-sialidase, Group VI
C4B63_5g588	0.295567	PRFA01000005:534,577..537,213(-)	trans-sialidase
C4B63_5g426	0.295567	PRFA01000005:889,913..892,417(-)	trans-sialidase, Group II
C4B63_8g313	0.295567	PRFA01000008:640,743..643,469(-)	trans-sialidase
C4B63_11g373	0.295567	PRFA01000011:366,611..369,316(-)	trans-sialidase, Group V
C4B63_13g367	0.295567	PRFA01000013:77,359..80,046(-)	trans-sialidase, Group V
C4B63_15g219	0.295567	PRFA01000015:418,340..420,931(+)	trans-sialidase, Group V
C4B63_15g224	0.295567	PRFA01000015:429,885..432,701(+)	trans-sialidase, Group VI
C4B63_15g253	0.295567	PRFA01000015:511,580..514,381(+)	trans-sialidase, Group V
C4B63_16g202	0.295567	PRFA01000016:546,227..548,788(+)	trans-sialidase, Group II
C4B63_26g53	0.295567	PRFA01000026:96,943..99,786(+)	trans-sialidase, Group VI
C4B63_27g332	0.295567	PRFA01000027:36,671..39,268(-)	trans-sialidase, Group V
C4B63_27g274	0.295567	PRFA01000027:156,366..158,951(-)	trans-sialidase, Group V
C4B63_27g269	0.295567	PRFA01000027:167,251..169,989(-)	trans-sialidase, Group V
C4B63_27g262	0.295567	PRFA01000027:187,857..190,463(-)	trans-sialidase, Group V
C4B63_28g340	0.295567	PRFA01000028:21,847..25,014(-)	trans-sialidase, Group VIII
C4B63_29g85	0.295567	PRFA01000029:156,081..158,852(+)	trans-sialidase, Group V
C4B63_33g194	0.295567	PRFA01000033:419,910..423,053(+)	trans-sialidase
C4B63_36g60	0.295567	PRFA01000036:117,965..120,751(+)	trans-sialidase, Group V
C4B63_36g147	0.295567	PRFA01000036:317,078..319,876(+)	trans-sialidase, Group V
C4B63_49g193	0.295567	PRFA01000049:80,674..83,031(-)	trans-sialidase, Group II
C4B63_50g228	0.295567	PRFA01000050:46,964..49,708(-)	trans-sialidase, Group VI
C4B63_53g228	0.295567	PRFA01000053:58,002..60,710(-)	trans-sialidase, Group V
C4B63_54g93	0.295567	PRFA01000054:222,852..225,488(+)	trans-sialidase, Group V
C4B63_62g159	0.295567	PRFA01000062:104,566..107,274(-)	trans-sialidase, Group V
C4B63_68g74	0.295567	PRFA01000068:177,160..180,297(-)	trans-sialidase, Group VIII
C4B63_74g124	0.295567	PRFA01000074:69,363..72,014(-)	trans-sialidase
C4B63_75g82	0.295567	PRFA01000075:79,061..81,775(-)	trans-sialidase, Group IV
C4B63_90g81	0.295567	PRFA01000090:76,306..79,011(-)	trans-sialidase, Group V
C4B63_99g80	0.295567	PRFA01000099:68,660..71,479(-)	trans-sialidase, Group VI
C4B63_117g67	0.295567	PRFA01000117:23,547..26,312(-)	trans-sialidase, Group VIII
C4B63_121g77	0.295567	PRFA01000121:35,888..38,401(-)	trans-sialidase, Group V
C4B63_125g58	0.295567	PRFA01000125:54,737..57,685(-)	trans-sialidase, Group V
C4B63_138g18	0.295567	PRFA01000138:32,424..34,775(+)	trans-sialidase, Group V
C4B63_141g8	0.295567	PRFA01000141:10,863..13,385(+)	trans-sialidase, Group II
C4B63_147g50	0.295567	PRFA01000147:36,449..38,938(-)	trans-sialidase, Group V
C4B63_150g12	0.295567	PRFA01000150:43,990..46,857(+)	trans-sialidase, Group V
C4B63_169g40	0.295567	PRFA01000169:20,273..23,149(-)	trans-sialidase, Group VI
C4B63_169g33	0.295567	PRFA01000169:41,534..44,350(-)	trans-sialidase, Group VI
C4B63_209g4	0.295567	PRFA01000209:7,396..9,720(+)	trans-sialidase, Group II
C4B63_226g20	0.295567	PRFA01000226:18,692..21,841(-)	trans-sialidase, Group VIII
C4B63_231g14	0.295567	PRFA01000231:22,499..25,630(+)	trans-sialidase, Group VIII
C4B63_408g15	0.295567	PRFA01000408:8,827..11,952(-)	trans-sialidase, Group VIII
C4B63_1g86	0.197044	PRFA01000001:184,965..187,430(+)	trans-sialidase, Group V
C4B63_1g1122	0.197044	PRFA01000001:701,698..704,346(-)	trans-sialidase, Group V
C4B63_1g965	0.197044	PRFA01000001:1,031,046..1,033,706(-)	trans-sialidase
C4B63_1g941	0.197044	PRFA01000001:1,078,012..1,080,369(-)	trans-sialidase, Group V
C4B63_1g596	0.197044	PRFA01000001:1,367,788..1,370,457(+)	trans-sialidase
C4B63_3g1059	0.197044	PRFA01000003:163,304..166,105(-)	trans-sialidase, Group V
C4B63_3g951	0.197044	PRFA01000003:382,103..384,862(-)	trans-sialidase, Group VI
C4B63_3g911	0.197044	PRFA01000003:459,296..462,148(-)	trans-sialidase, Group V
C4B63_3g205	0.197044	PRFA01000003:469,771..472,542(+)	trans-sialidase, Group VI
C4B63_3g865	0.197044	PRFA01000003:552,200..554,899(-)	trans-sialidase, Group V
C4B63_3g300	0.197044	PRFA01000003:678,889..681,321(+)	trans-sialidase, Group V
C4B63_3g495	0.197044	PRFA01000003:1,098,875..1,101,589(+)	trans-sialidase, Group VI
C4B63_5g26	0.197044	PRFA01000005:65,051..67,402(+)	trans-sialidase, Group V
C4B63_5g125	0.197044	PRFA01000005:288,704..291,121(+)	trans-sialidase, Group V
C4B63_5g227	0.197044	PRFA01000005:524,130..526,802(+)	trans-sialidase, Group V
C4B63_5g544	0.197044	PRFA01000005:633,086..635,809(-)	trans-sialidase
C4B63_5g368	0.197044	PRFA01000005:797,225..799,906(+)	trans-sialidase, Group V
C4B63_14g120	0.197044	PRFA01000014:268,964..271,351(+)	trans-sialidase, Group V
C4B63_15g27	0.197044	PRFA01000015:55,105..57,777(+)	trans-sialidase
C4B63_15g504	0.197044	PRFA01000015:95,946..98,780(-)	trans-sialidase, Group V
C4B63_15g133	0.197044	PRFA01000015:235,571..238,006(+)	trans-sialidase, Group V
C4B63_15g382	0.197044	PRFA01000015:335,816..338,524(-)	trans-sialidase, Group VI
C4B63_16g33	0.197044	PRFA01000016:65,468..67,915(+)	trans-sialidase, Group VIII
C4B63_21g180	0.197044	PRFA01000021:483,980..487,126(+)	trans-sialidase, Group VIII
C4B63_22g131	0.197044	PRFA01000022:356,510..359,647(+)	trans-sialidase, Group VIII
C4B63_24g328	0.197044	PRFA01000024:99,777..102,011(-)	trans-sialidase, Group II
C4B63_24g287	0.197044	PRFA01000024:177,254..179,605(-)	trans-sialidase, Group V
C4B63_29g449	0.197044	PRFA01000029:21,292..24,078(-)	trans-sialidase, Group VI
C4B63_29g38	0.197044	PRFA01000029:72,571..75,360(+)	trans-sialidase, Group VI
C4B63_29g328	0.197044	PRFA01000029:247,342..250,224(-)	trans-sialidase, Group VI
C4B63_33g56	0.197044	PRFA01000033:132,818..135,724(+)	trans-sialidase, Group VI
C4B63_33g308	0.197044	PRFA01000033:175,475..178,468(-)	trans-sialidase, Group V
C4B63_33g274	0.197044	PRFA01000033:246,366..249,164(-)	trans-sialidase, Group VI
C4B63_36g184	0.197044	PRFA01000036:381,208..383,640(+)	trans-sialidase, Group V
C4B63_36g54	0.197044	PRFA01000036:102,343..105,114(+)	trans-sialidase, Group V
C4B63_36g108	0.197044	PRFA01000036:226,462..229,284(+)	trans-sialidase, Group VI
C4B63_36g112	0.197044	PRFA01000036:236,314..239,136(+)	trans-sialidase, Group V
C4B63_36g130	0.197044	PRFA01000036:281,647..284,436(+)	trans-sialidase, Group VI
C4B63_39g144	0.197044	PRFA01000039:340,139..342,631(+)	trans-sialidase, Group V
C4B63_39g147	0.197044	PRFA01000039:346,738..349,041(+)	trans-sialidase, Group V
C4B63_43g95	0.197044	PRFA01000043:351,035..353,503(+)	trans-sialidase, Group II
C4B63_47g160	0.197044	PRFA01000047:14,170..17,295(-)	trans-sialidase, Group VIII
C4B63_50g180	0.197044	PRFA01000050:143,431..145,842(-)	trans-sialidase, Group V
C4B63_50g170	0.197044	PRFA01000050:166,013..168,424(-)	trans-sialidase, Group V
C4B63_50g158	0.197044	PRFA01000050:186,960..189,743(-)	trans-sialidase, Group VI
C4B63_53g171	0.197044	PRFA01000053:180,099..182,711(-)	trans-sialidase, Group V
C4B63_54g100	0.197044	PRFA01000054:239,440..242,037(+)	trans-sialidase, Group V
C4B63_60g82	0.197044	PRFA01000060:217,271..219,787(-)	trans-sialidase, Group V
C4B63_62g140	0.197044	PRFA01000062:134,851..137,487(-)	trans-sialidase, Group VI
C4B63_62g98	0.197044	PRFA01000062:186,458..189,598(+)	trans-sialidase, Group VIII
C4B63_63g143	0.197044	PRFA01000063:11,858..14,545(-)	trans-sialidase, Group IV
C4B63_65g19	0.197044	PRFA01000065:32,052..35,189(+)	trans-sialidase, Group VIII
C4B63_67g15	0.197044	PRFA01000067:24,346..27,126(+)	trans-sialidase, Group VI
C4B63_67g58	0.197044	PRFA01000067:106,515..108,926(+)	trans-sialidase, Group V
C4B63_69g50	0.197044	PRFA01000069:105,048..107,204(+)	trans-sialidase, Group I
C4B63_75g77	0.197044	PRFA01000075:89,671..92,166(-)	trans-sialidase, Group II
C4B63_82g111	0.197044	PRFA01000082:18,424..21,192(-)	trans-sialidase, Group IV
C4B63_88g108	0.197044	PRFA01000088:21,140..23,926(-)	trans-sialidase, Group V
C4B63_94g87	0.197044	PRFA01000094:27,387..30,533(-)	trans-sialidase, Group VIII
C4B63_98g20	0.197044	PRFA01000098:45,238..48,405(+)	trans-sialidase, Group IV
C4B63_103g65	0.197044	PRFA01000103:48,989..51,736(-)	trans-sialidase, Group VI
C4B63_107g78	0.197044	PRFA01000107:64,123..66,963(-)	trans-sialidase, Group VI
C4B63_109g60	0.197044	PRFA01000109:61,279..63,903(-)	trans-sialidase, Group IV
C4B63_115g14	0.197044	PRFA01000115:27,481..30,345(+)	trans-sialidase, Group V
C4B63_117g59	0.197044	PRFA01000117:48,849..51,236(-)	trans-sialidase, Group II
C4B63_120g24	0.197044	PRFA01000120:33,749..36,334(+)	trans-sialidase, Group V
C4B63_121g88	0.197044	PRFA01000121:15,470..18,058(-)	trans-sialidase, Group V
C4B63_121g82	0.197044	PRFA01000121:24,631..27,396(-)	trans-sialidase, Group VI
C4B63_125g62	0.197044	PRFA01000125:45,996..48,830(-)	trans-sialidase, Group V
C4B63_132g12	0.197044	PRFA01000132:35,008..37,494(+)	trans-sialidase, Group V
C4B63_136g3	0.197044	PRFA01000136:2,972..5,830(+)	trans-sialidase, Group V
C4B63_138g13	0.197044	PRFA01000138:19,736..22,111(+)	trans-sialidase, Group V
C4B63_144g11	0.197044	PRFA01000144:21,477..24,029(+)	trans-sialidase, Group V
C4B63_152g35	0.197044	PRFA01000152:25,645..27,801(-)	trans-sialidase, Group II
C4B63_157g44	0.197044	PRFA01000157:14,871..17,513(-)	trans-sialidase, Group IV
C4B63_159g21	0.197044	PRFA01000159:60,691..63,129(+)	trans-sialidase, Group VIII
C4B63_160g23	0.197044	PRFA01000160:44,838..47,285(+)	trans-sialidase, Group VIII
C4B63_197g31	0.197044	PRFA01000197:14,138..16,909(-)	trans-sialidase, Group V
C4B63_209g8	0.197044	PRFA01000209:22,653..24,860(+)	trans-sialidase, Group II
C4B63_309g17	0.197044	PRFA01000309:3,884..5,890(-)	trans-sialidase, Group I
C4B63_311g10	0.197044	PRFA01000311:9,680..12,058(+)	trans-sialidase, Group V
C4B63_325g12	0.197044	PRFA01000325:16,459..19,197(-)	trans-sialidase, Group V
C4B63_1g106	0.0985222	PRFA01000001:231,804..234,290(+)	trans-sialidase, Group II
C4B63_1g1255	0.0985222	PRFA01000001:417,964..420,345(-)	trans-sialidase, Group V
C4B63_1g1234	0.0985222	PRFA01000001:461,729..464,377(-)	trans-sialidase
C4B63_1g240	0.0985222	PRFA01000001:519,590..522,124(+)	trans-sialidase, Group V
C4B63_1g1161	0.0985222	PRFA01000001:613,678..616,170(-)	trans-sialidase, Group II
C4B63_1g282	0.0985222	PRFA01000001:658,799..661,288(+)	trans-sialidase, Group V
C4B63_1g302	0.0985222	PRFA01000001:713,493..715,808(+)	trans-sialidase, Group VIII
C4B63_1g1100	0.0985222	PRFA01000001:755,676..759,026(-)	trans-sialidase, Group VIII
C4B63_1g352	0.0985222	PRFA01000001:841,895..844,546(+)	trans-sialidase
C4B63_1g1052	0.0985222	PRFA01000001:860,465..863,113(-)	trans-sialidase, Group V
C4B63_1g383	0.0985222	PRFA01000001:916,531..919,029(+)	trans-sialidase, Group V
C4B63_1g953	0.0985222	PRFA01000001:1,059,998..1,062,358(-)	trans-sialidase, Group V
C4B63_1g935	0.0985222	PRFA01000001:1,088,876..1,091,557(-)	trans-sialidase, Group V
C4B63_1g931	0.0985222	PRFA01000001:1,097,723..1,100,407(-)	trans-sialidase, Group V
C4B63_1g546	0.0985222	PRFA01000001:1,268,981..1,271,719(+)	trans-sialidase, Group V
C4B63_1g564	0.0985222	PRFA01000001:1,298,212..1,301,373(+)	trans-sialidase, Group VIII
C4B63_1g604	0.0985222	PRFA01000001:1,387,028..1,389,694(+)	trans-sialidase
C4B63_1g791	0.0985222	PRFA01000001:1,458,769..1,461,327(-)	trans-sialidase
C4B63_3g996	0.0985222	PRFA01000003:294,076..296,898(-)	trans-sialidase, Group VI
C4B63_3g957	0.0985222	PRFA01000003:369,104..371,902(-)	trans-sialidase, Group VI
C4B63_3g799	0.0985222	PRFA01000003:697,715..700,489(-)	trans-sialidase, Group V
C4B63_3g767	0.0985222	PRFA01000003:765,223..768,033(-)	trans-sialidase, Group V
C4B63_3g756	0.0985222	PRFA01000003:790,315..793,074(-)	trans-sialidase, Group V
C4B63_3g392	0.0985222	PRFA01000003:877,940..880,777(+)	trans-sialidase, Group VI
C4B63_3g405	0.0985222	PRFA01000003:907,102..909,897(+)	trans-sialidase, Group V
C4B63_3g449	0.0985222	PRFA01000003:1,015,346..1,018,144(+)	trans-sialidase, Group V
C4B63_3g467	0.0985222	PRFA01000003:1,049,114..1,051,942(+)	trans-sialidase, Group VI
C4B63_5g693	0.0985222	PRFA01000005:242,164..244,839(-)	trans-sialidase, Group V
C4B63_5g117	0.0985222	PRFA01000005:269,107..272,274(+)	trans-sialidase, Group VIII
C4B63_5g156	0.0985222	PRFA01000005:350,247..352,892(+)	trans-sialidase, Group V
C4B63_5g643	0.0985222	PRFA01000005:382,226..384,967(-)	trans-sialidase, Group V
C4B63_5g222	0.0985222	PRFA01000005:513,812..516,502(+)	trans-sialidase, Group V
C4B63_5g241	0.0985222	PRFA01000005:544,855..547,620(+)	trans-sialidase, Group V
C4B63_5g298	0.0985222	PRFA01000005:660,351..663,050(+)	trans-sialidase, Group V
C4B63_5g319	0.0985222	PRFA01000005:702,807..705,299(+)	trans-sialidase, Group VI
C4B63_5g385	0.0985222	PRFA01000005:845,886..848,555(+)	trans-sialidase, Group V
C4B63_8g82	0.0985222	PRFA01000008:331,806..334,568(+)	trans-sialidase, Group V
C4B63_8g93	0.0985222	PRFA01000008:349,537..352,257(+)	trans-sialidase, Group V
C4B63_8g97	0.0985222	PRFA01000008:358,557..361,184(+)	trans-sialidase, Group VI
C4B63_9g97	0.0985222	PRFA01000009:364,216..366,936(+)	trans-sialidase, Group V
C4B63_11g419	0.0985222	PRFA01000011:262,245..264,827(-)	trans-sialidase, Group V
C4B63_14g126	0.0985222	PRFA01000014:284,930..287,284(+)	trans-sialidase, Group I
C4B63_15g494	0.0985222	PRFA01000015:121,875..124,634(-)	trans-sialidase, Group VI
C4B63_15g460	0.0985222	PRFA01000015:175,165..177,900(-)	trans-sialidase, Group V
C4B63_15g125	0.0985222	PRFA01000015:218,125..220,956(+)	trans-sialidase, Group VI
C4B63_15g370	0.0985222	PRFA01000015:363,236..365,935(-)	trans-sialidase, Group VI
C4B63_15g353	0.0985222	PRFA01000015:404,106..406,940(-)	trans-sialidase, Group VI
C4B63_15g314	0.0985222	PRFA01000015:484,960..487,665(-)	trans-sialidase, Group V
C4B63_16g142	0.0985222	PRFA01000016:405,252..407,780(+)	trans-sialidase, Group II
C4B63_26g37	0.0985222	PRFA01000026:74,950..77,814(+)	trans-sialidase, Group V
C4B63_29g15	0.0985222	PRFA01000029:36,775..39,528(+)	trans-sialidase, Group V
C4B63_29g60	0.0985222	PRFA01000029:118,317..121,013(+)	trans-sialidase, Group V
C4B63_32g139	0.0985222	PRFA01000032:377,181..380,183(+)	trans-sialidase, Group VI
C4B63_33g41	0.0985222	PRFA01000033:93,377..96,139(+)	trans-sialidase, Group V
C4B63_33g44	0.0985222	PRFA01000033:101,376..104,069(+)	trans-sialidase, Group V
C4B63_33g61	0.0985222	PRFA01000033:143,885..146,455(+)	trans-sialidase, Group V
C4B63_33g276	0.0985222	PRFA01000033:238,455..241,319(-)	trans-sialidase, Group VI
C4B63_36g21	0.0985222	PRFA01000036:41,068..43,494(+)	trans-sialidase, Group V
C4B63_36g57	0.0985222	PRFA01000036:108,707..111,454(+)	trans-sialidase, Group VI
C4B63_36g101	0.0985222	PRFA01000036:200,890..203,553(+)	trans-sialidase, Group VI
C4B63_37g68	0.0985222	PRFA01000037:175,326..177,977(+)	trans-sialidase, Group VI
C4B63_37g181	0.0985222	PRFA01000037:354,996..357,737(+)	trans-sialidase, Group VI
C4B63_38g303	0.0985222	PRFA01000038:50,741..53,128(-)	trans-sialidase, Group II
C4B63_46g117	0.0985222	PRFA01000046:325,822..327,147(+)	trans-sialidase, Group V
C4B63_50g208	0.0985222	PRFA01000050:75,968..78,724(-)	trans-sialidase, Group VI
C4B63_50g139	0.0985222	PRFA01000050:234,130..236,778(-)	trans-sialidase, Group VI
C4B63_51g225	0.0985222	PRFA01000051:39,854..40,951(-)	trans-sialidase, Group V
C4B63_51g213	0.0985222	PRFA01000051:72,522..74,618(-)	trans-sialidase, Group V
C4B63_52g93	0.0985222	PRFA01000052:267,382..269,550(-)	trans-sialidase
C4B63_53g59	0.0985222	PRFA01000053:112,117..114,762(+)	trans-sialidase
C4B63_53g178	0.0985222	PRFA01000053:157,620..160,289(-)	trans-sialidase, Group V
C4B63_57g39	0.0985222	PRFA01000057:188,021..190,708(+)	trans-sialidase, Group V
C4B63_62g3	0.0985222	PRFA01000062:2,734..5,142(+)	trans-sialidase, Group V
C4B63_64g118	0.0985222	PRFA01000064:212,311..214,998(-)	trans-sialidase, Group V
C4B63_65g113	0.0985222	PRFA01000065:172,113..174,512(+)	trans-sialidase, Group V
C4B63_65g127	0.0985222	PRFA01000065:195,966..198,590(+)	trans-sialidase, Group VI
C4B63_67g211	0.0985222	PRFA01000067:13,691..16,297(-)	trans-sialidase, Group VI
C4B63_68g121	0.0985222	PRFA01000068:32,935..35,403(-)	trans-sialidase, Group II
C4B63_68g107	0.0985222	PRFA01000068:70,118..72,646(-)	trans-sialidase, Group II
C4B63_68g91	0.0985222	PRFA01000068:125,009..128,143(-)	trans-sialidase, Group VIII
C4B63_71g6	0.0985222	PRFA01000071:16,957..19,779(+)	trans-sialidase, Group VI
C4B63_71g133	0.0985222	PRFA01000071:126,699..129,329(-)	trans-sialidase, Group VI
C4B63_71g106	0.0985222	PRFA01000071:173,717..176,458(-)	trans-sialidase, Group VI
C4B63_86g82	0.0985222	PRFA01000086:55,855..58,410(-)	trans-sialidase, Group V
C4B63_88g112	0.0985222	PRFA01000088:11,255..13,573(-)	trans-sialidase, Group V
C4B63_93g4	0.0985222	PRFA01000093:5,685..7,958(+)	trans-sialidase, Group II
C4B63_96g82	0.0985222	PRFA01000096:37,556..40,369(-)	trans-sialidase, Group VI
C4B63_96g77	0.0985222	PRFA01000096:45,671..48,469(-)	trans-sialidase, Group V
C4B63_98g6	0.0985222	PRFA01000098:13,713..16,055(+)	trans-sialidase
C4B63_105g64	0.0985222	PRFA01000105:30,619..33,087(-)	trans-sialidase, Group II
C4B63_106g54	0.0985222	PRFA01000106:58,177..60,906(-)	trans-sialidase, Group V
C4B63_106g50	0.0985222	PRFA01000106:67,956..70,514(-)	trans-sialidase, Group V
C4B63_121g1	0.0985222	PRFA01000121:5,338..7,926(+)	trans-sialidase, Group V
C4B63_122g41	0.0985222	PRFA01000122:67,303..70,059(-)	trans-sialidase, Group V
C4B63_125g16	0.0985222	PRFA01000125:32,837..35,692(+)	trans-sialidase, Group VI
C4B63_126g4	0.0985222	PRFA01000126:5,677..8,040(+)	trans-sialidase, Group V
C4B63_131g40	0.0985222	PRFA01000131:73,203..75,728(-)	trans-sialidase, Group II
C4B63_134g38	0.0985222	PRFA01000134:68,740..71,205(-)	trans-sialidase, Group V
C4B63_139g40	0.0985222	PRFA01000139:58,847..61,636(-)	trans-sialidase, Group V
C4B63_145g8	0.0985222	PRFA01000145:10,715..13,483(+)	trans-sialidase, Group IV
C4B63_151g45	0.0985222	PRFA01000151:30,993..33,581(-)	trans-sialidase, Group VI
C4B63_153g14	0.0985222	PRFA01000153:44,717..47,857(+)	trans-sialidase, Group VIII
C4B63_155g14	0.0985222	PRFA01000155:45,509..47,569(+)	trans-sialidase, Group II
C4B63_157g36	0.0985222	PRFA01000157:34,395..36,569(-)	trans-sialidase, Group II
C4B63_159g4	0.0985222	PRFA01000159:11,558..14,065(+)	trans-sialidase, Group II
C4B63_167g33	0.0985222	PRFA01000167:38,564..41,086(-)	trans-sialidase, Group II
C4B63_169g36	0.0985222	PRFA01000169:32,421..35,144(-)	trans-sialidase, Group V
C4B63_196g41	0.0985222	PRFA01000196:22,503..24,860(-)	trans-sialidase, Group V
C4B63_232g21	0.0985222	PRFA01000232:33,473..35,635(-)	trans-sialidase, Group I
C4B63_259g18	0.0985222	PRFA01000259:15,148..17,595(-)	trans-sialidase, Group II
C4B63_319g8	0.0985222	PRFA01000319:16,126..18,264(+)	trans-sialidase, Group II
C4B63_319g9	0.0985222	PRFA01000319:20,144..22,396(+)	trans-sialidase, Group II
C4B63_1g1312	0	PRFA01000001:298,097..300,733(-)	trans-sialidase
C4B63_1g226	0	PRFA01000001:491,561..494,215(+)	trans-sialidase, Group V
C4B63_1g1147	0	PRFA01000001:641,015..643,501(-)	trans-sialidase
C4B63_1g1097	0	PRFA01000001:764,602..767,766(-)	trans-sialidase, Group VIII
C4B63_1g1091	0	PRFA01000001:776,214..778,874(-)	trans-sialidase
C4B63_1g388	0	PRFA01000001:926,841..929,405(+)	trans-sialidase, Group V
C4B63_1g402	0	PRFA01000001:949,433..951,931(+)	trans-sialidase, Group VI
C4B63_1g998	0	PRFA01000001:978,056..979,687(-)	trans-sialidase, Group V
C4B63_1g508	0	PRFA01000001:1,193,105..1,195,450(+)	trans-sialidase, Group V
C4B63_1g623	0	PRFA01000001:1,429,413..1,431,923(+)	trans-sialidase, Group V
C4B63_1g729	0	PRFA01000001:1,610,714..1,613,038(-)	trans-sialidase, Group V
C4B63_3g1077	0	PRFA01000003:128,207..130,702(-)	trans-sialidase, Group V
C4B63_3g938	0	PRFA01000003:407,483..410,248(-)	trans-sialidase, Group VI
C4B63_3g916	0	PRFA01000003:448,460..451,192(-)	trans-sialidase, Group V
C4B63_3g897	0	PRFA01000003:491,854..494,664(-)	trans-sialidase, Group VI
C4B63_3g888	0	PRFA01000003:511,751..514,615(-)	trans-sialidase, Group VI
C4B63_3g843	0	PRFA01000003:596,302..599,070(-)	trans-sialidase, Group V
C4B63_3g667	0	PRFA01000003:958,812..961,604(-)	trans-sialidase, Group V
C4B63_3g618	0	PRFA01000003:1,078,365..1,081,166(-)	trans-sialidase, Group V
C4B63_3g501	0	PRFA01000003:1,111,499..1,114,318(+)	trans-sialidase, Group VI
C4B63_3g561	0	PRFA01000003:1,205,452..1,208,154(-)	trans-sialidase
C4B63_5g782	0	PRFA01000005:21,136..23,484(-)	trans-sialidase, Group V
C4B63_5g778	0	PRFA01000005:31,798..34,140(-)	trans-sialidase, Group V
C4B63_5g152	0	PRFA01000005:341,940..344,591(+)	trans-sialidase, Group V
C4B63_5g248	0	PRFA01000005:561,173..563,518(+)	trans-sialidase, Group V
C4B63_5g307	0	PRFA01000005:678,652..681,366(+)	trans-sialidase, Group V
C4B63_8g102	0	PRFA01000008:371,675..374,452(+)	trans-sialidase, Group V
C4B63_8g123	0	PRFA01000008:409,931..412,708(+)	trans-sialidase, Group V
C4B63_8g129	0	PRFA01000008:423,432..426,200(+)	trans-sialidase, Group VI
C4B63_8g134	0	PRFA01000008:432,284..435,055(+)	trans-sialidase, Group V
C4B63_8g148	0	PRFA01000008:456,830..459,484(+)	trans-sialidase, Group V
C4B63_8g152	0	PRFA01000008:465,481..468,219(+)	trans-sialidase, Group V
C4B63_8g156	0	PRFA01000008:474,210..476,894(+)	trans-sialidase, Group V
C4B63_8g159	0	PRFA01000008:482,941..485,679(+)	trans-sialidase, Group V
C4B63_8g168	0	PRFA01000008:500,768..503,344(+)	trans-sialidase, Group V
C4B63_8g186	0	PRFA01000008:547,399..550,056(+)	trans-sialidase
C4B63_8g254	0	PRFA01000008:726,875..729,700(+)	trans-sialidase, Group VI
C4B63_9g94	0	PRFA01000009:354,482..357,196(+)	trans-sialidase, Group V
C4B63_11g122	0	PRFA01000011:279,605..282,316(+)	trans-sialidase, Group VI
C4B63_11g401	0	PRFA01000011:309,664..312,369(-)	trans-sialidase, Group V
C4B63_11g147	0	PRFA01000011:328,452..331,562(+)	trans-sialidase, Group VIII
C4B63_11g169	0	PRFA01000011:381,232..384,072(+)	trans-sialidase, Group VI
C4B63_11g196	0	PRFA01000011:464,535..467,645(+)	trans-sialidase, Group VIII
C4B63_11g252	0	PRFA01000011:569,989..572,829(+)	trans-sialidase, Group VI
C4B63_14g128	0	PRFA01000014:289,585..291,942(+)	trans-sialidase, Group I
C4B63_15g501	0	PRFA01000015:104,750..107,503(-)	trans-sialidase, Group V
C4B63_15g77	0	PRFA01000015:143,536..146,259(+)	trans-sialidase, Group V
C4B63_15g83	0	PRFA01000015:155,134..157,929(+)	trans-sialidase, Group V
C4B63_15g107	0	PRFA01000015:196,887..199,667(+)	trans-sialidase, Group VI
C4B63_15g137	0	PRFA01000015:242,876..245,635(+)	trans-sialidase, Group V
C4B63_15g411	0	PRFA01000015:270,887..273,598(-)	trans-sialidase, Group V
C4B63_15g380	0	PRFA01000015:343,422..346,205(-)	trans-sialidase, Group V
C4B63_15g360	0	PRFA01000015:380,347..383,175(-)	trans-sialidase, Group VI
C4B63_21g165	0	PRFA01000021:449,596..452,745(+)	trans-sialidase, Group VIII
C4B63_25g29	0	PRFA01000025:122,166..124,295(+)	trans-sialidase, Group I
C4B63_26g29	0	PRFA01000026:59,896..63,087(+)	trans-sialidase, Group I
C4B63_29g428	0	PRFA01000029:57,149..59,896(-)	trans-sialidase, Group V
C4B63_29g49	0	PRFA01000029:89,914..92,619(+)	trans-sialidase, Group V
C4B63_29g57	0	PRFA01000029:110,291..112,978(+)	trans-sialidase, Group V
C4B63_29g89	0	PRFA01000029:167,122..169,728(+)	trans-sialidase, Group V
C4B63_29g325	0	PRFA01000029:255,152..257,977(-)	trans-sialidase, Group V
C4B63_29g134	0	PRFA01000029:265,459..268,287(+)	trans-sialidase, Group VI
C4B63_32g187	0	PRFA01000032:387,776..390,559(-)	trans-sialidase, Group V
C4B63_33g67	0	PRFA01000033:151,461..154,274(+)	trans-sialidase, Group V
C4B63_34g136	0	PRFA01000034:371,906..374,566(+)	trans-sialidase, Group V
C4B63_36g308	0	PRFA01000036:156,563..159,400(-)	trans-sialidase, Group VI
C4B63_36g87	0	PRFA01000036:174,832..177,543(+)	trans-sialidase, Group V
C4B63_36g92	0	PRFA01000036:186,262..189,051(+)	trans-sialidase, Group V
C4B63_36g117	0	PRFA01000036:249,416..252,202(+)	trans-sialidase, Group V
C4B63_36g122	0	PRFA01000036:261,764..264,559(+)	trans-sialidase, Group V
C4B63_36g228	0	PRFA01000036:345,700..348,540(-)	trans-sialidase, Group VI
C4B63_36g171	0	PRFA01000036:356,299..359,010(+)	trans-sialidase, Group V
C4B63_36g177	0	PRFA01000036:367,718..370,150(+)	trans-sialidase, Group V
C4B63_36g195	0	PRFA01000036:399,262..402,051(+)	trans-sialidase, Group V
C4B63_37g376	0	PRFA01000037:113,008..115,200(-)	trans-sialidase, Group II
C4B63_39g128	0	PRFA01000039:310,125..312,812(+)	trans-sialidase, Group V
C4B63_40g167	0	PRFA01000040:339,527..341,773(+)	trans-sialidase, Group II
C4B63_40g169	0	PRFA01000040:343,671..345,917(+)	trans-sialidase, Group II
C4B63_40g171	0	PRFA01000040:347,805..349,976(+)	trans-sialidase, Group II
C4B63_40g175	0	PRFA01000040:356,070..358,319(+)	trans-sialidase, Group II
C4B63_40g176	0	PRFA01000040:360,202..362,454(+)	trans-sialidase, Group II
C4B63_40g178	0	PRFA01000040:368,467..370,719(+)	trans-sialidase, Group II
C4B63_40g179	0	PRFA01000040:372,595..374,847(+)	trans-sialidase, Group II
C4B63_49g216	0	PRFA01000049:30,073..32,253(-)	trans-sialidase, Group II
C4B63_50g240	0	PRFA01000050:26,337..29,087(-)	trans-sialidase, Group VI
C4B63_50g176	0	PRFA01000050:152,737..155,499(-)	trans-sialidase, Group VI
C4B63_50g167	0	PRFA01000050:174,364..177,246(-)	trans-sialidase, Group V
C4B63_50g148	0	PRFA01000050:208,684..211,560(-)	trans-sialidase, Group V
C4B63_50g142	0	PRFA01000050:224,822..227,233(-)	trans-sialidase, Group V
C4B63_53g72	0	PRFA01000053:137,140..139,818(+)	trans-sialidase
C4B63_58g229	0	PRFA01000058:18,952..21,339(-)	trans-sialidase, Group II
C4B63_59g231	0	PRFA01000059:63,141..65,747(-)	trans-sialidase, Group V
C4B63_59g222	0	PRFA01000059:81,316..83,922(-)	trans-sialidase, Group V
C4B63_62g184	0	PRFA01000062:70,265..71,509(-)	trans-sialidase, Group VI
C4B63_62g100	0	PRFA01000062:191,734..194,241(+)	trans-sialidase, Group II
C4B63_62g102	0	PRFA01000062:196,452..198,959(+)	trans-sialidase, Group II
C4B63_62g108	0	PRFA01000062:205,890..208,397(+)	trans-sialidase, Group II
C4B63_64g57	0	PRFA01000064:97,929..100,406(+)	trans-sialidase, Group V
C4B63_65g44	0	PRFA01000065:67,665..70,034(+)	trans-sialidase, Group II
C4B63_65g103	0	PRFA01000065:160,338..163,001(+)	trans-sialidase, Group VI
C4B63_65g151	0	PRFA01000065:185,588..188,218(-)	trans-sialidase, Group VI
C4B63_66g68	0	PRFA01000066:163,226..165,697(+)	trans-sialidase, Group V
C4B63_66g53	0	PRFA01000066:127,409..130,255(+)	trans-sialidase, Group VI
C4B63_66g71	0	PRFA01000066:169,801..172,128(+)	trans-sialidase
C4B63_67g166	0	PRFA01000067:85,049..87,790(-)	trans-sialidase, Group VI
C4B63_67g71	0	PRFA01000067:128,893..131,679(+)	trans-sialidase, Group VI
C4B63_67g85	0	PRFA01000067:153,686..156,049(+)	trans-sialidase, Group II
C4B63_71g168	0	PRFA01000071:85,103..87,766(-)	trans-sialidase, Group VI
C4B63_71g118	0	PRFA01000071:153,176..155,929(-)	trans-sialidase, Group VI
C4B63_74g119	0	PRFA01000074:79,714..82,380(-)	trans-sialidase, Group V
C4B63_93g6	0	PRFA01000093:9,838..12,111(+)	trans-sialidase, Group II
C4B63_94g93	0	PRFA01000094:15,786..18,260(-)	trans-sialidase, Group II
C4B63_94g80	0	PRFA01000094:56,651..59,800(-)	trans-sialidase, Group VIII
C4B63_96g86	0	PRFA01000096:29,613..32,306(-)	trans-sialidase, Group V
C4B63_96g34	0	PRFA01000096:71,408..74,029(+)	trans-sialidase, Group V
C4B63_98g34	0	PRFA01000098:82,037..84,211(+)	trans-sialidase
C4B63_99g71	0	PRFA01000099:84,510..86,063(-)	trans-sialidase, Group V
C4B63_103g75	0	PRFA01000103:24,336..27,056(-)	trans-sialidase, Group VI
C4B63_106g72	0	PRFA01000106:24,160..26,715(-)	trans-sialidase, Group V
C4B63_106g60	0	PRFA01000106:48,609..49,706(-)	trans-sialidase, Group V
C4B63_107g93	0	PRFA01000107:29,245..32,070(-)	trans-sialidase, Group VI
C4B63_107g30	0	PRFA01000107:41,856..45,278(+)	trans-sialidase, Group VIII
C4B63_109g65	0	PRFA01000109:48,316..50,940(-)	trans-sialidase, Group IV
C4B63_111g8	0	PRFA01000111:11,804..14,401(+)	trans-sialidase, Group V
C4B63_115g3	0	PRFA01000115:5,868..8,519(+)	trans-sialidase, Group V
C4B63_115g23	0	PRFA01000115:58,299..60,941(+)	trans-sialidase, Group V
C4B63_115g33	0	PRFA01000115:76,015..78,369(+)	trans-sialidase, Group V
C4B63_125g69	0	PRFA01000125:22,157..25,021(-)	trans-sialidase, Group VI
C4B63_125g45	0	PRFA01000125:73,196..75,904(-)	trans-sialidase, Group V
C4B63_126g23	0	PRFA01000126:51,573..54,305(+)	trans-sialidase, Group V
C4B63_132g23	0	PRFA01000132:62,500..64,827(+)	trans-sialidase
C4B63_135g24	0	PRFA01000135:60,711..63,152(-)	trans-sialidase, Group V
C4B63_136g12	0	PRFA01000136:27,750..30,608(+)	trans-sialidase, Group V
C4B63_139g8	0	PRFA01000139:18,325..21,027(+)	trans-sialidase, Group V
C4B63_139g14	0	PRFA01000139:35,484..38,189(+)	trans-sialidase, Group V
C4B63_139g34	0	PRFA01000139:71,522..74,359(-)	trans-sialidase, Group VI
C4B63_144g5	0	PRFA01000144:6,744..8,936(+)	trans-sialidase, Group I
C4B63_144g19	0	PRFA01000144:40,803..43,355(+)	trans-sialidase
C4B63_151g44	0	PRFA01000151:35,712..38,300(-)	trans-sialidase, Group VI
C4B63_167g40	0	PRFA01000167:11,636..14,146(-)	trans-sialidase, Group I
C4B63_173g10	0	PRFA01000173:16,520..17,683(+)	trans-sialidase, Group II
C4B63_240g5	0	PRFA01000240:13,637..15,841(+)	trans-sialidase, Group II
C4B63_244g6	0	PRFA01000244:10,600..12,729(+)	trans-sialidase, Group I
C4B63_244g7	0	PRFA01000244:13,906..16,035(+)	trans-sialidase, Group I
C4B63_244g8	0	PRFA01000244:17,211..19,340(+)	trans-sialidase, Group I
C4B63_244g9	0	PRFA01000244:20,515..22,644(+)	trans-sialidase, Group I
C4B63_305g4	0	PRFA01000305:12,691..14,874(+)	trans-sialidase, Group II
C4B63_387g18	0	PRFA01000387:7,056..9,305(-)	trans-sialidase, Group II
C4B63_387g14	0	PRFA01000387:15,340..17,589(-)	trans-sialidase, Group II
